# Supplementary material for: Genome sequence of the barred knifejaw Oplegnathus fasciatus (Temminck & Schlegel, 1844): the first chromosome-level draft genome in the family Oplegnathidae
Source: PubMed Central journal article supplement (PMC6423371; doi:10.1093/gigascience/giz013), 2019-02-01

## Genome sequence of rock bream, *Oplegnathus fasciatus* (Temminck & Schlegel, 1884): the first draft genome in family Oplegnathidae --Manuscript Draft--

|                                                      |                                                                                                                                                                                                                                                                                                                                                                                                                                                                                                                                                                                                                                                                                                                                                                                                                                                                                                                                                                                                                                                                                                                                                                                                                                                                                                                                                                                                                                                                                                                                                                                                                                                                                                                                                                                                                                                                                                                                                                                                                                                                                                                                                                                                                                                                                                                                                                                                                                                                                                                                                                       |                     |
|------------------------------------------------------|-----------------------------------------------------------------------------------------------------------------------------------------------------------------------------------------------------------------------------------------------------------------------------------------------------------------------------------------------------------------------------------------------------------------------------------------------------------------------------------------------------------------------------------------------------------------------------------------------------------------------------------------------------------------------------------------------------------------------------------------------------------------------------------------------------------------------------------------------------------------------------------------------------------------------------------------------------------------------------------------------------------------------------------------------------------------------------------------------------------------------------------------------------------------------------------------------------------------------------------------------------------------------------------------------------------------------------------------------------------------------------------------------------------------------------------------------------------------------------------------------------------------------------------------------------------------------------------------------------------------------------------------------------------------------------------------------------------------------------------------------------------------------------------------------------------------------------------------------------------------------------------------------------------------------------------------------------------------------------------------------------------------------------------------------------------------------------------------------------------------------------------------------------------------------------------------------------------------------------------------------------------------------------------------------------------------------------------------------------------------------------------------------------------------------------------------------------------------------------------------------------------------------------------------------------------------------|---------------------|
| <b>Manuscript Number:</b>                            | GIGA-D-18-00300                                                                                                                                                                                                                                                                                                                                                                                                                                                                                                                                                                                                                                                                                                                                                                                                                                                                                                                                                                                                                                                                                                                                                                                                                                                                                                                                                                                                                                                                                                                                                                                                                                                                                                                                                                                                                                                                                                                                                                                                                                                                                                                                                                                                                                                                                                                                                                                                                                                                                                                                                       |                     |
| <b>Full Title:</b>                                   | Genome sequence of rock bream, <i>Oplegnathus fasciatus</i> (Temminck & Schlegel, 1884): the first draft genome in family Oplegnathidae                                                                                                                                                                                                                                                                                                                                                                                                                                                                                                                                                                                                                                                                                                                                                                                                                                                                                                                                                                                                                                                                                                                                                                                                                                                                                                                                                                                                                                                                                                                                                                                                                                                                                                                                                                                                                                                                                                                                                                                                                                                                                                                                                                                                                                                                                                                                                                                                                               |                     |
| <b>Article Type:</b>                                 | Data Note                                                                                                                                                                                                                                                                                                                                                                                                                                                                                                                                                                                                                                                                                                                                                                                                                                                                                                                                                                                                                                                                                                                                                                                                                                                                                                                                                                                                                                                                                                                                                                                                                                                                                                                                                                                                                                                                                                                                                                                                                                                                                                                                                                                                                                                                                                                                                                                                                                                                                                                                                             |                     |
| <b>Funding Information:</b>                          | Shandong Province Key Research and Invention Program (2017GHY15102, 2017GHY15106)                                                                                                                                                                                                                                                                                                                                                                                                                                                                                                                                                                                                                                                                                                                                                                                                                                                                                                                                                                                                                                                                                                                                                                                                                                                                                                                                                                                                                                                                                                                                                                                                                                                                                                                                                                                                                                                                                                                                                                                                                                                                                                                                                                                                                                                                                                                                                                                                                                                                                     | Dr. Yongshuang Xiao |
|                                                      | Young Scientists Fund (41506170)                                                                                                                                                                                                                                                                                                                                                                                                                                                                                                                                                                                                                                                                                                                                                                                                                                                                                                                                                                                                                                                                                                                                                                                                                                                                                                                                                                                                                                                                                                                                                                                                                                                                                                                                                                                                                                                                                                                                                                                                                                                                                                                                                                                                                                                                                                                                                                                                                                                                                                                                      | Dr. Yongshuang Xiao |
| <b>Abstract:</b>                                     | <p><b>Background</b><br/>The rock bream (<i>Oplegnathus fasciatus</i>), a member of the Oplegnathidae family of the Perciformes, is a commercially important rocky reef fish native to East Asia. <i>O. fasciatus</i> has become an important fishery resource for offshore cage aquaculture and fish stocking of marine ranching in China, Japan and Korea. Recently, growth of sexual dimorphism with neo-sex chromosome and widespread biotic diseases in <i>O. fasciatus</i> has received increasing concern. However, the adequate genome resources to make insight into sex-determining mechanism and to establish genetically basing resistant breeding systems for <i>O. fasciatus</i> have been lacking. Here, we performed whole genome of female fish for <i>O. fasciatus</i> using long-read sequencing and Hi-C data to generate chromosome-length scaffolds with highly contiguous genome assembly.</p> <p><b>Findings</b><br/>We assembled the <i>O. fasciatus</i> with a total of 245.0 Gb of raw reads, which were generated using both of PacBio Sequel and Illumina HiSeq 2000 platforms. The final draft genome assembly was approximately 778.7 Mb, which reached a remarkable high level of continuity with contig N50 of 2.1 Mb. The genome size was consistent with the estimated genome size (808.9 Mb) based on k-mer analysis. The identified repeat sequences account for 32.2% of the whole genome and 24 003 protein-coding genes with an average of 10.1 exons per gene were annotated using de novo method and with RNA-seq data and homologies to other teleosts. We combined Hi-C data with draft genome assembly to generate chromosome-length scaffolds. Twenty-four scaffolds corresponding to the twenty-four chromosomes were assembled to a final size of 768.8 Mb with contig N50 2.1 Mb and scaffold N50 of 33.5 Mb using 1372 contigs. According to the phylogenetic analysis using protein-coding genes, the <i>O. fasciatus</i> was close related to <i>Larimichthys crocea</i> and <i>O. fasciatus</i> diverged from their ancestor was at about 70.3-87.3 million years ago.</p> <p><b>Conclusions</b><br/>We generated high-quality draft genome and chromosomes assembly for <i>O. fasciatus</i> using long reads generated using PacBio sequencing technologies, which is the first reference genome for Oplegnathidae species. The genome assembly will provide insight into sex-determining mechanism and serve as a resource for accelerating the genome-assisted improvement of resistant breeding systems.</p> |                     |
| <b>Corresponding Author:</b>                         | Yongshuang Xiao<br><br>CHINA                                                                                                                                                                                                                                                                                                                                                                                                                                                                                                                                                                                                                                                                                                                                                                                                                                                                                                                                                                                                                                                                                                                                                                                                                                                                                                                                                                                                                                                                                                                                                                                                                                                                                                                                                                                                                                                                                                                                                                                                                                                                                                                                                                                                                                                                                                                                                                                                                                                                                                                                          |                     |
| <b>Corresponding Author Secondary Information:</b>   |                                                                                                                                                                                                                                                                                                                                                                                                                                                                                                                                                                                                                                                                                                                                                                                                                                                                                                                                                                                                                                                                                                                                                                                                                                                                                                                                                                                                                                                                                                                                                                                                                                                                                                                                                                                                                                                                                                                                                                                                                                                                                                                                                                                                                                                                                                                                                                                                                                                                                                                                                                       |                     |
| <b>Corresponding Author's Institution:</b>           |                                                                                                                                                                                                                                                                                                                                                                                                                                                                                                                                                                                                                                                                                                                                                                                                                                                                                                                                                                                                                                                                                                                                                                                                                                                                                                                                                                                                                                                                                                                                                                                                                                                                                                                                                                                                                                                                                                                                                                                                                                                                                                                                                                                                                                                                                                                                                                                                                                                                                                                                                                       |                     |
| <b>Corresponding Author's Secondary Institution:</b> |                                                                                                                                                                                                                                                                                                                                                                                                                                                                                                                                                                                                                                                                                                                                                                                                                                                                                                                                                                                                                                                                                                                                                                                                                                                                                                                                                                                                                                                                                                                                                                                                                                                                                                                                                                                                                                                                                                                                                                                                                                                                                                                                                                                                                                                                                                                                                                                                                                                                                                                                                                       |                     |
| <b>First Author:</b>                                 | Yongshuang Xiao                                                                                                                                                                                                                                                                                                                                                                                                                                                                                                                                                                                                                                                                                                                                                                                                                                                                                                                                                                                                                                                                                                                                                                                                                                                                                                                                                                                                                                                                                                                                                                                                                                                                                                                                                                                                                                                                                                                                                                                                                                                                                                                                                                                                                                                                                                                                                                                                                                                                                                                                                       |                     |

|                                                                                                                                                                                                                                                                                                                                                                                                                                                                                                                                     |                 |
|-------------------------------------------------------------------------------------------------------------------------------------------------------------------------------------------------------------------------------------------------------------------------------------------------------------------------------------------------------------------------------------------------------------------------------------------------------------------------------------------------------------------------------------|-----------------|
| <b>First Author Secondary Information:</b>                                                                                                                                                                                                                                                                                                                                                                                                                                                                                          |                 |
| <b>Order of Authors:</b>                                                                                                                                                                                                                                                                                                                                                                                                                                                                                                            | Yongshuang Xiao |
|                                                                                                                                                                                                                                                                                                                                                                                                                                                                                                                                     | Zhizhong Xiao   |
|                                                                                                                                                                                                                                                                                                                                                                                                                                                                                                                                     | Jing Liu        |
|                                                                                                                                                                                                                                                                                                                                                                                                                                                                                                                                     | Daoyuan Ma      |
|                                                                                                                                                                                                                                                                                                                                                                                                                                                                                                                                     | Jun Li          |
| <b>Order of Authors Secondary Information:</b>                                                                                                                                                                                                                                                                                                                                                                                                                                                                                      |                 |
| <b>Additional Information:</b>                                                                                                                                                                                                                                                                                                                                                                                                                                                                                                      |                 |
| <b>Question</b>                                                                                                                                                                                                                                                                                                                                                                                                                                                                                                                     | <b>Response</b> |
| Are you submitting this manuscript to a special series or article collection?                                                                                                                                                                                                                                                                                                                                                                                                                                                       | No              |
| <p><b>Experimental design and statistics</b></p> <p>Full details of the experimental design and statistical methods used should be given in the Methods section, as detailed in our <a href="#">Minimum Standards Reporting Checklist</a>. Information essential to interpreting the data presented should be made available in the figure legends.</p> <p>Have you included all the information requested in your manuscript?</p>                                                                                                  | Yes             |
| <p><b>Resources</b></p> <p>A description of all resources used, including antibodies, cell lines, animals and software tools, with enough information to allow them to be uniquely identified, should be included in the Methods section. Authors are strongly encouraged to cite <a href="#">Research Resource Identifiers</a> (RRIDs) for antibodies, model organisms and tools, where possible.</p> <p>Have you included the information requested as detailed in our <a href="#">Minimum Standards Reporting Checklist</a>?</p> | Yes             |
| <p><b>Availability of data and materials</b></p> <p>All datasets and code on which the</p>                                                                                                                                                                                                                                                                                                                                                                                                                                          | Yes             |

conclusions of the paper rely must be either included in your submission or deposited in [publicly available repositories](#) (where available and ethically appropriate), referencing such data using a unique identifier in the references and in the “Availability of Data and Materials” section of your manuscript.

Have you have met the above requirement as detailed in our [Minimum Standards Reporting Checklist](#)?

[Click here to view linked References](#)

1 **Genome sequence of rock bream, *Oplegnathus fasciatus***  
2 **(Temminck & Schlegel, 1884): the first draft genome in**  
3 **family Oplegnathidae**

4  
5 Yongshuang Xiao<sup>1,2,3, †</sup>, Zhizhong Xiao<sup>1,2,3, †</sup>, Jing Liu<sup>2,4\*</sup>, Daoyuan Ma<sup>1,2,3\*</sup>, Jun  
6 Li<sup>1,2,3\*</sup>

7 <sup>1</sup>CAS Key Laboratory of Experimental Marine Biology, Institute of Oceanology,  
8 Chinese Academy of Sciences, 7 Nanhai Road, Qingdao, 266071, China, <sup>2</sup>Laboratory  
9 for Marine Biology and Biotechnology, Qingdao National Laboratory for Marine  
10 Science and Technology, 7 Nanhai Road, Qingdao, 266071, China, <sup>3</sup>Center for Ocean  
11 Mega-Science, Chinese Academy of Sciences, 7 Nanhai Road, Qingdao, 266071,  
12 China.

13  
14 \*Correspondence address: Jing Liu, Institute of Oceanology, Chinese Academy of  
15 Sciences, 7 Nanhai Road, Qingdao, 266071, China; Tel: +86-053282898790; E-mail:  
16 jliu@qdio.ac.cn; Daoyuan Ma, Mega-Science, Chinese Academy of Sciences, 7  
17 Nanhai Road, Qingdao, 266071, China; Tel: +86-053282898717; E-mail:  
18 madaoyuan1@163.com; Jun Li, Institute of Oceanology, Chinese Academy of  
19 Sciences, 7 Nanhai Road, Qingdao, 266071, China; Tel: +86-053282898718; E-mail:  
20 junli@qdio.ac.cn.

21 †Contributed equally to this work.

1  
2  
3  
4  
5  
6  
7  
8  
9  
10  
11  
12  
13  
14  
15  
16  
17  
18  
19  
20  
21  
22  
23  
24  
25  
26  
27  
28  
29 **Abstract**

30 **Background**

31 The rock bream (*Oplegnathus fasciatus*), a member of the Oplegnathidae family of  
32 the Perciformes, is a commercially important rocky reef fish native to East Asia. *O.*  
33 *fasciatus* has become an important fishery resource for offshore cage aquaculture and  
34 fish stocking of marine ranching in China, Japan and Korea. Recently, growth of  
35 sexual dimorphism with neo-sex chromosome and widespread biotic diseases in *O.*  
36 *fasciatus* has received increasing concern. However, the adequate genome resources  
37 to make insight into sex-determining mechanism and to establish genetically basing  
38 resistant breeding systems for *O. fasciatus* have been lacking. Here, we performed  
39 whole genome of female fish for *O. fasciatus* using long-read sequencing and Hi-C  
40 data to generate chromosome-length scaffolds with highly contiguous genome  
41 assembly.

42 **Findings**

43 We assembled the *O. fasciatus* with a total of 245.0 Gb of raw reads, which were  
44 generated using both of PacBio Sequel and Illumina Hiseq 2000 platforms. The final  
45 draft genome assembly was approximately 778.7 Mb, which reached a remarkable  
46 high level of continuity with contig N50 of 2.1 Mb. The genome size was consistent  
47 with the estimated genome size (808.9 Mb) based on *k*-mer analysis. The identified  
48 repeat sequences account for 32.2% of the whole genome and 24 003 protein-coding  
49 genes with an average of 10.1 exons per gene were annotated using *de novo* method  
50 and with RNA-seq data and homologies to other teleosts. We combined Hi-C data  
51 with draft genome assembly to generate chromosome-length scaffolds. Twenty-four  
52 scaffolds corresponding to the twenty-four chromosomes were assembled to a final  
53 size of 768.8 Mb with contig N50 2.1 Mb and scaffold N50 of 33.5 Mb using 1372  
54 contigs. According to the phylogenetic analysis using protein-coding genes, the *O.*  
55 *fasciatus* was close related to *Larimichthys crocea* and *O. fasciatus* diverged from  
56 their ancestor was at about 70.3-87.3 million years ago.

57 **Conclusions**

58 We generated high-quality draft genome and chromosomes assembly for *O. fasciatus*  
59  
60  
61  
62  
63  
64  
65

1 59 using long reads generated using PacBio sequencing technologies, which is the first  
2 60 reference genome for Oplegnathidae species. The genome assembly will provide  
3  
4 61 insight into sex-determining mechanism and serve as a resource for accelerating the  
5  
6 62 genome-assisted improvement of resistant breeding systems.

7  
8  
9 63 *Keywords: Oplegnathus fasciatus*; genome assembly; Hi-C assembly; sex-determining  
10 64 mechanism

## 11 12 13 65 **Data description**

### 14 15 66 **Introduction of *O. fasciatus***

16  
17 67 The family Oplegnathidae belongs to the order Perciformes, including only one genus  
18  
19 68 *Oplegnathus* comprised of two species, *O. fasciatus* and *O. punctatus* that are of  
20  
21 69 commercial values. The rock bream, *O. fasciatus* (Temminck & Schlegel, 1844), is  
22  
23 70 one of the two species in the *Oplegnathus*, which is commonly found at the depth of  
24  
25 71 one to ten meters in association with rocky reefs<sup>1,2</sup>, being distributed in a wide range  
26  
27 72 of shallow waters around Korea, Japan, China and Hawaii<sup>1,3,4</sup> (Fig. 1). *O. fasciatus*  
28  
29 73 has become an important fishery resource for offshore cage aquaculture and fish  
30  
31 74 stocking of marine ranching in China, Japan and Korea<sup>5</sup>. It was reported that the male  
32  
33 75 of *Oplegnathus* has a neo-sex chromosome, possibly a sex chromosome Y, and the sex  
34  
35 76 chromosome system for *Oplegnathus* was considered to be X<sub>1</sub> X<sub>1</sub> X<sub>2</sub> X<sub>2</sub> / X<sub>1</sub> X<sub>2</sub> Y  
36  
37 77 based on the karyotype analyses<sup>6,7</sup>. Furthermore, the growth sexual dimorphism was  
38  
39 78 detected in the *O. fasciatus* and the male fish showed a faster growth advantage than  
40  
41 79 the female, may be due to the sex chromosome system of *Oplegnathus*<sup>8</sup>. *O. fasciatus*  
42  
43 80 is vulnerable to viruses (eg. Iridovirus) and genetic degradation caused by inbreeding  
44  
45 81 has led to higher susceptibility to diseases<sup>9,10</sup>. It is vital to develop genomic resources  
46  
47 82 for making insight into sex-determining mechanism and accelerating the  
48  
49 83 genome-assisted improvement of resistant breeding systems.

50  
51  
52 84 So far, the genome sequence and the chromosomes assembly of *O. fasciatus*  
53  
54 85 have not been reported. Here we performed a high-quality reference genome assembly  
55  
56 86 for *O. fasciatus* constructed using long reads by the PacBio DNA sequencing platform,  
57  
58 87 and using a genome assembly strategy by taking advantage of genome assembler  
59  
60  
61  
62  
63  
64  
65

1 88 Canu<sup>11</sup>. The genome assembly of *O. fasciatus* is the first reference genome  
2 89 constructed for the family Oplegnathidae. The completeness and continuity of the  
3 90 genome will provide high quality genomic resources for studies on sex-determining  
4 91 mechanism and for accelerating the genome-assisted improvement of resistant  
5 92 breeding systems.  
6  
7  
8  
9

10 93

#### 11 94 **Genomic DNA extraction, genome size estimation and Hi-C library construction**

12 95 High-quality genomic DNA for Illumina platform (Illumina Inc., San Diego, CA,  
13 96 USA) and PacBio Sequel sequencing (Pacific Biosciences of California, Menlo Park,  
14 97 CA, USA) was extracted from fresh muscle tissue and blood sample of a single  
15 98 female *O. fasciatus*. The fish was collected from the near-shore area of Qingdao city  
16 99 (Yellow Sea), Shandong province. A whole-genome using Illumina DNA sequencing  
17 100 technology was applied to estimate *O. fasciatus* genome size. A short-insert library  
18 101 (300~350 bp) was constructed and generated a total of ~90.7 Gb of raw reads using  
19 102 the standard protocol provided by Illumina HiSeq X Ten platform (Illumina Inc., San  
20 103 Diego, CA, USA). After removal of low-quality and redundant reads, we obtained  
21 104 about ~80.8 Gb of clean data for *de novo* assembly to estimate the genome size (S  
22 105 Table 1, Fig. 2). All the cleaned reads were subjected to 17-mer frequency distribution  
23 106 analysis<sup>12</sup>. As the total number of *k*-mers was about  $8.09 \times 10^{10}$  and the peak of *k*-mers  
24 107 at a depth of 100, the genome size of *O. fasciatus* was calculated to be 808.9 Mb  
25 108 using the following formula: genome size = *k*-mer number / peak depth (Fig. 2).  
26 109 Meanwhile, the estimated heterozygosity of 0.29% and a repeat content of 38.46%  
27 110 were detected for *O. fasciatus* in this work. A pilot genome assembly was  
28 111 approximately 808.9 Mb with a contig N50 7.2 kb and scaffold N50 84.1kb using the  
29 112 Illumina data and the assembly program Platanus package<sup>13</sup> (S Table 2). The GC  
30 113 content was 41% (S Fig. 1). This genome assembly was of low-quality partly due to  
31 114 its high genomics repeat content.  
32  
33  
34  
35  
36  
37  
38  
39  
40  
41  
42  
43  
44  
45  
46  
47  
48  
49  
50  
51  
52  
53  
54

55 115 The genomic DNA for Hi-C library was extracted from the whole-blood cell of  
56 116 *O. fasciatus* as described<sup>14</sup>. The cells were fixed with formaldehyde and lysed, and the  
57 117 cross-linked DNA digested with MboI. Sticky ends were biotin-labeled and proximity  
58  
59  
60  
61  
62  
63  
64  
65

1 118 ligated to form chimeric junctions that were enriched for and then physically sheared  
2 119 to a size of 300–500 bp<sup>14</sup>. Chimeric fragments representing the original cross-linked  
3  
4 120 long-distance physical interactions were then processed into paired-end sequencing  
5  
6 121 libraries, and 629 million 150-bp paired-end Illumina reads (91.5 Gb) with Q20 and  
7  
8 122 Q30 of ~94.0% were produced (S Table 1, S Table 3). As a result, the paired data, data  
9  
10 123 with mate mapped to a different contig (or scaffold) and data with mapped to a  
11  
12 124 different contig (or scaffold) (map Q5  $\geq$  5) were 593.7 Mb (94.4%), 240.5 Mb  
13  
14 125 (40.5%) and 205.1 Mb (34.6%), respectively (S Table 3).  
15  
16  
17 126

### 18 127 **Genome assembly using PacBio long reads**

19 128 Two 20 kb genomic DNA libraries were constructed and sequenced using PacBio  
20  
21 129 Sequel platform, generating 62.9 Gb raw DNA reads. We obtain 4.8 million subreads  
22  
23 130 (totally 62.8 Gb) with a read N50 length of ~22 kb after removing adaptor (S Table  
24  
25 131 1).  
26  
27  
28

29 132 The Canu v1.4 was firstly used to assemble the genome with the  
30  
31 133 Corrected-Error-Rate parameter set at 0.040<sup>11</sup>. As a result, a total length of 875.9 Mb  
32  
33 134 genome assembly was achieved for *O. fasciatus*, which was consistent with the  
34  
35 135 estimated genome size in 17-mer analysis based on the Illumina data (S Table 2). We  
36  
37 136 applied Redundans v0.13c<sup>15</sup> to remove the sequence redundancy and obtain genome  
38  
39 137 assembly size of 778.0 Mb. We then used the Arrow of Smrtlink 5.0 with the  
40  
41 138 minCoverage parameter set at 15 to implement the error correction based on the  
42  
43 139 PacBio long reads data (Table 1). The resulting genome assembly was further  
44  
45 140 polished using NGS data, which were used in the genome survey analysis above. The  
46  
47 141 final draft genome assembly was 778.7 Mb, which reached a remarkable high level of  
48  
49 142 continuity with contig N50 length of 2.1 Mb (Table 1). The contig N50 of *O. fasciatus*  
50  
51 143 was much higher than those of previous fish genome assemblies constructed using  
52  
53 144 NGS DNA sequencing technologies, and is comparable with those of recently  
54  
55 145 reported model fish species (S Table 4)  
56  
57  
58  
59 146

### 60 147 **Genome quality evaluation**

61  
62  
63  
64  
65



1 148 To assess the completeness of the assembled *O. fasciatus* genome, we subjected the  
2  
3 149 sequences to BUSCO version 3 evaluation (BUSCO, actinopterygii\_odb9)<sup>16</sup>. Overall,  
4  
5 150 96.6% and 1.5 % of the 4 584 expected actinopterygii genes were identified in the  
6  
7 151 assembled genome as complete and partial BUSCO profiles, respectively.  
8  
9 152 Approximately 85 genes could be considered missing in our assembly (S Table 5).  
10  
11 153 Among the expected complete actinopterygii genes, both of 4 259 and 171 were  
12  
13 154 identified as single copy and duplicated BUSCOs, respectively (S Table 5). We then  
14  
15 155 used the Minimap2 to estimate the completeness and homogeneity of genome  
16  
17 156 assembly based on the CLR (Continuous Long Reads) subreads. A high quality of  
18  
19 157 completeness and homogeneity was checked for genome assembly, and the mapping  
20  
21 158 rate, coverage rate and average sequencing depth were reached to 90.2%, 99.9% and  
22  
23 159 80.6, respectively (S Table 6).

24  
25 160 To further evaluate the accuracy of *O. fasciatus* genome assembly, we aligned  
26  
27 161 the NGS-based short reads from whole-genome sequencing data against the reference  
28  
29 162 genome using BWA<sup>17</sup>. We then used the GATK to implement the SNP calling and  
30  
31 163 filter work, the result showed 99.8% and 0.2 % of the  $1.6 \times 10^6$  expected SNP reads  
32  
33 164 were identified in the assembled genome as heterozygosis and homology SNPs,  
34  
35 165 respectively. SNP calling on the final assembly also yield a heterozygosity rate of  
36  
37 166 0.20%, supporting the estimate from *k*-mer analysis (0.29%) (S Table 7).

38  
39  
40 167

#### 41 168 **Repeat sequence within the *O. fasciatus* genome assembly**

42  
43 169 To identify tandem repeats, we utilized Tandem Repeat Finder to annotate repetitive  
44  
45 170 elements in the *O. fasciatus* genome. RepeatModeler (version 1.04) and  
46  
47 171 LTR\_FINDER<sup>18</sup> were used to construct a *de novo* repeat library with default  
48  
49 172 parameters. Subsequently, we used RepeatMasker<sup>19</sup> (version 3.2.9) to map our  
50  
51 173 assembled sequences on the Repbase TE (version 14.04)<sup>20</sup> and the *de novo* repeat  
52  
53 174 library to identify known and novel transposable elements (TEs). In addition, the  
54  
55 175 TE-related proteins were annotated by using RepeatProteinMask software (version  
56  
57 176 3.2.2)<sup>19</sup>.

58  
59  
60 177 The total identified repeat sequences accounted for 23.6% of the *O. fasciatus*

61  
62  
63  
64  
65

1 178 genome based on the *de novo* repeat library (Table 2). Approximately 23.41% of the  
2 179 *O. fasciatus* genome was identified as interspersed repeats (most often TEs). Among  
3  
4 180 them, DNA transposable elements were the most abundant type of repeat sequences,  
5  
6 181 which occupied 11.5% of the whole genome. The long interspersed nuclear elements  
7  
8 182 (LINE) and long terminal repeat (LTR) took up 7.3% and 4.0% of the whole genome  
9  
10 183 (Table 2, S Fig. 2).

#### 11 184 **RNA preparation and sequencing**

12 185 We sequenced cDNA libraries prepared from the eggs of *O. fasciatus* used for genome  
13  
14 186 annotation using Illumina sequencing technologies. High quality of RNA were  
15  
16 187 detected based on the estimation of the absorbance at 260nm / 280nm (OD = 2.0) and  
17  
18 188 the RIN (value = 9.2) by Nanodrop ND-1000 spectrophotometer (LabTech, USA) and  
19  
20 189 2100 Bioanalyzer (Agilent Technologies, USA), respectively. We used the Clontech  
21  
22 190 SMARTer cDNA synthesis kit to complete the process of reverse transcription. The  
23  
24 191 paired-end library was prepared following the manual of the Paired-End Sample  
25  
26 192 Preparation Kit (Illumina Inc., San Diego, CA, USA). Finally, the library with an  
27  
28 193 insert length of 300 bp was sequenced by Illumina HiSeq X Ten in 150PE mode  
29  
30 194 (Illumina Inc., San Diego, CA, USA). As a result, we obtained ~42.2 Gb high-quality  
31  
32 195 transcriptome data from RNA-seq (S Table 1, S Table 8)

#### 33 196 **Gene annotation**

34 197 Gene annotation of the *O. fasciatus* genome was performed using *de novo*,  
35  
36 198 homology-based and transcriptome sequencing-based prediction. We employed  
37  
38 199 Augustus (version 2.5.5)<sup>21</sup> and GenScan (version 1.0)<sup>22</sup> softwares to predict  
39  
40 200 protein-coding genes of *O. fasciatus* genome assembly. Protein sequences of closely  
41  
42 201 related fish species including *Larimichthys crocea*, *Lates calcarifer*, *Gasterosteus*  
43  
44 202 *aculeatus*, *Paralichthys olivaceus*, *Cynoglossus semilaevis* and *Gadus morhua* were  
45  
46 203 downloaded from Ensembl<sup>23</sup> and aligned against to *O. fasciatus* genome using  
47  
48 204 TBLASTN software<sup>24</sup>. Subsequently, Genewise2.2.0 software<sup>25</sup> was employed to  
49  
50 205 predict the potential gene structures on all alignments.

51  
52 206 We also mapped these NGS transcriptome short reads onto our genome assembly  
53  
54 207 using TopHat1.2 software<sup>26</sup>, and then we employed Cufflinks<sup>27</sup> to predict the gene

1 208 structures (S Table 9). All gene models were then integrated using MAKER to obtain  
2 209 a consensus gene set<sup>28</sup>. The final total gene set was composed of 24 003 genes, with  
3 210 an average of 10.1 exons per gene in *O. fasciatus* genome (Table 1). The gene number,  
4 211 gene length distribution, CDS length distribution, exon length distribution and intron  
5 212 length distribution were all comparable with those in other teleost fish species (S  
6 213 Table 9, S Fig. 3).

7 214 In order to further obtain functional annotation of the protein-coding genes in *O.*  
8 215 *fasciatus* genome, we employed local BLASTX and BLASTN programs to align upon  
9 216 the non-redundant protein (NR), non-redundant nucleotide (NT) and Swissprot  
10 217 database with an e-value  $\leq 1e-5^{29}$ . We also used Blast2GO software to search the  
11 218 Gene ontology (GO), Kyoto Encyclopedia of Genes and Genomes (KEGG) pathway  
12 219 database<sup>30, 31, 32</sup>. Finally, 97.3% (23 364 genes) of the 24 003 genes were annotated by  
13 220 at least one database (S Table10). Four types of non-coding RNAs (microRNAs,  
14 221 transfer RNAs, ribosomal RNAs, and small nuclear RNAs) were also annotated using  
15 222 tRNAscan-SE and the Rfam database in this study<sup>33, 34</sup> (S Table11).

### 16 223 **Hi-C assembly and chromosome interactions**

17 224 Hi-C was a sequencing-based approach for determining chromosome interactions by  
18 225 calculating the contact frequency between pairs of loci, which depended strongly on  
19 226 the one-dimensional distance, in base pairs, between a pair of loci<sup>35, 36</sup>. We employed  
20 227 BWA and Lachesis softwares to align paired-end reads to the draft genome assembly  
21 228 and filtered all base sequences other than 500bp from each restriction site<sup>37</sup>.  
22 229 According to the conduct of clustering, ordering, and orienting to the assembly  
23 230 contigs (1 692), those were grouped into 24 chromosome clusters and scaffolded  
24 231 using Lachesis software with tuned parameters<sup>38</sup> (Table 3, Fig. 3). Finally, we  
25 232 constructed the chromosome interactions map using Juicer software and employed the  
26 233 JucieBox to complete the visual correction of interactions map. We obtained polished  
27 234 1 756 contigs by interrupting misassembly from the 1 692 contigs. Twenty-four  
28 235 scaffolds corresponding to the 24 chromosomes of *O. fasciatus* based on the  
29 236 karyotype analyses were assembled<sup>6, 7</sup> (Table 3, Fig. 3). A final size of 768.8 Mb  
30 237 accounting for the 98.7% draft genome was assembled, which remarkable high level

1 238 of continuity with contig N50 of 2.1 Mb and scaffold N50 of 33.5 Mb using 1372  
2 239 contigs. The anchor rate of contigs (> 100 kb) to chromosomes was reached up to the  
3  
4 240 99.7% based on the Hi-C assembly (Table 4). The contig N50 and scaffold N50 of *O.*  
5  
6 241 *fasciatus* were much higher than those of previous fish genome assemblies  
7  
8 242 constructed using NGS DNA sequencing technologies based on the genome assembly  
9  
10 243 using PacBio long reads and Hi-C assembly (S Table 4).

#### 11 244 **Gene family identification and phylogenetic tree construction**

12 245 We employed the BLASTP program<sup>39</sup> with an e-value threshold of 1e-5 to identify  
13 246 gene family based on the transcripts alignments of each gene from *O. fasciatus* and  
14 247 other fish species, which included *Larimichthys crocea*, *Gadus morhua*, *Paralichthys*  
15 248 *olivaceus*, *Cynoglossus semilaevis*, *Notothenia coriiceps*, *Boleophthalmus*  
16 249 *pectinirostris*, *Branchiostoma floridae*, *Gasterosteus aculeatus*, *Callorhinchus milii*,  
17 250 *Danio rerio*, *Salmo salar* and *Oryzias latipes*. 23273 gene families were identified by  
18 251 clustering of homologous gene sequences based on H-scores calculated from  
19 252 Bit-score in Hcluster\_sg software (S Fig. 4). Subsequently, we selected 812  
20 253 single-copy orthogroups from the above-mentioned species to construct the  
21 254 phylogenetic relationship between *O. fasciatus* and the other fish species. We used the  
22 255 Clustal W program<sup>40</sup> to extract and align coding sequences of single-copy gene from  
23 256 the 765 orthogroups with length filter, respectively (S Fig. 5). All the alignments were  
24 257 concatenated as a single data set for each species. Nondegenerated sites extracted  
25 258 from the data set were then joined into new sequence of each species to construct a  
26 259 phylogenetic tree based on the maximum-likelihood method implemented in the  
27 260 PhyML package<sup>41</sup> (with the -m PROTGAMMAAUTO model). We used the  
28 261 MCMCtree program to estimate divergence times among species based on the  
29 262 approximate likelihood method<sup>42</sup> and a molecular clock data from the divergence time  
30 263 between medaka from the TimeTree database<sup>43</sup>. According to the phylogenetic  
31 264 analysis *O. fasciatus* were clustered together with *Larimichthys crocea* belonged to  
32 265 the order Perciformes, which was consistent with the fish species taxonomy. The  
33 266 taxonomy of Notothenioidei should be elevated to the order level from the  
34 267 Perciformes and be paralleled with Gasterosteiformes (Fig. 4). The divergence time  
35  
36  
37  
38  
39  
40  
41  
42  
43  
44  
45  
46  
47  
48  
49  
50  
51  
52  
53  
54  
55  
56  
57  
58  
59  
60  
61  
62  
63  
64  
65

1 268 between *O. fasciatus* and the common ancestor with *Larimichthys crocea* was at about  
2 269 70.3-87.3 Ma.

## 3 270 **Conclusion**

4 271 We successfully assembled the genome of *O. fasciatus* and reported the first whole  
5 272 genome sequencing, assembly and annotation based on long reads from the  
6 273 third-generation PacBio Sequel sequencing platform. The final draft genome  
7 274 assembly is approximately 778.7 Mb, accounting for 96.3% of the estimated genome  
8 275 size (808.9 Mb) based on *k*-mer analysis. The genome assembly of *O. fasciatus* was  
9 276 also the first high-quality genome of all species in Oplegnathidae family, which  
10 277 reached a remarkable high level of continuity with contig N50 of 2.1 Mb and scaffold  
11 278 N50 of 33.5 Mb. The contig N50 was remarkably longer than those of most fish  
12 279 genome assemblies, and was comparable with those of recently reported model fish  
13 280 species. We also predicated 24 003 protein-coding genes from the generated assembly,  
14 281 and 97.3% (23 364 genes) of all protein-coding genes were annotated. Twenty-four  
15 282 scaffolds corresponding to the twenty-four chromosomes were assembled to a final  
16 283 size of 768.8 Mb using 1372 contigs based on the Hi-C assembly. We found the  
17 284 taxonomy of Notothenioidei should be elevated to the order level and the divergence  
18 285 time between *O. fasciatus* and the common ancestor with *Larimichthys crocea* was at  
19 286 about 70.3-87.3 Ma. The genome assembly, together with gene annotation data  
20 287 generated in this work provided a valuable resource for research on sex-determining  
21 288 mechanism and for accelerating the genome-wide association studies on resistant  
22 289 breeding systems.

## 23 290 24 291 **Ethics Statement**

25 292 This research was approved by the Animal Care and Use committee of Chinese  
26 293 Academic Science. All participants consent the study under the 'Ethics, consent and  
27 294 permissions' heading. All participants consent to publish the work under the 'Consent  
28 295 to publish' heading.

## 29 296 30 297 **Availability of supporting data**

31  
32  
33  
34  
35  
36  
37  
38  
39  
40  
41  
42  
43  
44  
45  
46  
47  
48  
49  
50  
51  
52  
53  
54  
55  
56  
57  
58  
59  
60  
61  
62  
63  
64  
65

1 298 Supporting data and materials are available in the GigaScience GigaDB database,  
2 299 with the raw sequences deposited in the SRA under the accession number  
3 300 SRP158313.  
4  
5

6 301

### 8 302 **Competing interests**

10 303 The authors declare that they have no competing interests.  
11  
12

13 304

### 15 305 **Funding**

16 306 This study was supported by a grant from the National Natural Science Foundation of  
17 307 China (No. 41506170, No. 31672672, and No. 31872195), Shandong Province Key  
18 308 Research and Invention Program (2017GHY15102, 2017GHY15106), Qingdao  
19 309 Source Innovation Program (17-1-1-57-jch), Marine Fishery Institute of Zhejiang  
20 310 Province, Key Laboratory of Mariculture and Enhancement of Zhejiang Province  
21 311 (2016KF002). Qingdao National Laboratory for Marine Science and Technology  
22 312 (2015ASKJ02, 2015ASKJ02-03-03), STS project (KFZD-SW-106, ZSSD-019).  
23  
24  
25  
26  
27  
28  
29  
30

31 313

### 33 314 **Author Contributions**

34 315 YSX conceived the project. ZZX, DYM collected the samples and extracted the  
35 316 genomic DNA. YSX, JL and JL performed the genome assembly and data analysis.  
36 317 YSX, ZZX, JL, DYM and JL wrote the paper.  
37  
38  
39  
40

41 318

42 319

### 45 320 **Reference**

- 46 321 1. Schembri, P.J. *et al.* Occurrence of barred kinfejaw, *Oplegnathuf fasciatus* (Actinopterygii:  
47 322 Perciformes: Oplegnathidae), in Malta (Central Mediterranean) with a discussion on possible  
48 323 modes of entry. *Acta Ichthyol Piscat* 40,101-104 (2010).  
49  
50  
51  
52  
53  
54  
55 324 2. Mundy, B.C. Checklist of the fishes of the Hawaiian Archipelago. *Bishop Mus Bull Zool* 6,  
56 325 1-704 (2005).  
57  
58  
59  
60 326 3. An, H.S. & Hong, S.W. Genetic diversity of rock bream *Oplegnathus fasciatus* in Southern  
61  
62  
63  
64  
65

- 1  
2  
3  
4  
5  
6  
7  
8  
9  
10  
11  
12  
13  
14  
15  
16  
17  
18  
19  
20  
21  
22  
23  
24  
25  
26  
27  
28  
29  
30  
31  
32  
33  
34  
35  
36  
37  
38  
39  
40  
41  
42  
43  
44  
45  
46  
47  
48  
49  
50  
51  
52  
53  
54  
55  
56  
57  
58  
59  
60  
61  
62  
63  
64  
65
- 327 Korea. *Genes Genom* 30, 451-459 (2008).
- 328 4. Xiao, Y.S. *et al.* Pronounced population genetic differentiation in the rock bream  
329 *Oplegnathus fasciatus* inferred from mitochondrial DNA sequences. *Mitochondrial DNA A*  
330 27, 2045-2052 (2016).
- 331 5. Park, H.S. *et al.* Population Genetic Structure of Rock Bream (*Oplegnathus fasciatus*  
332 Temminck & Schlegel, 1884) Revealed by mtDNA COI Sequence in Korea and China.  
333 *Ocean Sci J* 53, 261-274 (2018).
- 334 6. Xu, D.D. *et al.* Chromosomal mapping of microsatellite repeats in the rock bream fish  
335 *Oplegnathus fasciatus*, with emphasis of their distribution in the neo-Y chromosome. *Mol*  
336 *Cytogenet* 6, 12 (2013).
- 337 7. Xue, R. *et al.* Karyotype and Ag-Nors In Male And Female Of *Oplegnathus Punctatus*.  
338 *Oceanol Limnol Sin* 47, 626-632 (2016).
- 339 8. Xiao, Z.Z. Study on population genetics and culture biology of *Oplegnathus fasciatus*.  
340 Doctor thesis p 162-176 (2015).
- 341 9. Zhang, B.C. *et al.* Rock bream (*Oplegnathus fasciatus*) viperin is a virus-responsive protein  
342 that modulates innate immunity and promotes resistance against megalocytivirus infection.  
343 *Dev Comp Immunol* 45, 35-42 (2014).
- 344 10. L, H. *et al.* Characterization of an Iridovirus Detected in Rock Bream (*Oplegnathus*  
345 *fasciatus* ;Temminck and Schlegel). *Chin J Virol* 27, 158-164 (2011).
- 346 11. Koren, S. *et al.* Canu: scalable and accurate long-read assembly via adaptive k-mer weighting  
347 and repeat separation. *Genome Res* 27, 722 (2017).
- 348 12. Marcais, G. & Kingsford, C. A fast, lock-free approach for efficient parallel counting of  
349 occurrences of k-mers. *Bioinformatics* 27, 764–70 (2011).
- 350 13. Kajitani, R. *et al.* Efficient de novo assembly of highly heterozygous genomes from  
351 whole-genome shotgun short reads. *Genome Res* 24, 1384-1395 (2014).
- 352 14. Sandborn, A.L. *et al.* Chromatin extrusion explains key features of loop and domain  
353 formation in wild-type and engineered genomes. *Proc Natl Acad Sci USA* 112, E6456 (2015).
- 354 15. Prysycz, L. P. & Gabaldón, T. Redundans: an assembly pipeline for highly heterozygous

- 1 355 genomes. *Nucleic Acids Res* 44, e113-e113 (2016).
- 2 356 16. Simão, F. A. *et al.* BUSCO: assessing genome assembly and annotation completeness with
- 3 357 single-copy orthologs. *Bioinformatics* 31, 3210 (2015).
- 4 358 17. Li, H. & Durbin, R. Fast and accurate short read alignment with Burrows–Wheeler transform
- 5 359 *Bioinformatics* 25, 1754-1760 (2009).
- 6 360 18. Benson, G. Tandem repeats finder: a program to analyze DNA sequences. *Nucleic Acids Res*
- 7 361 27, 573–80 (1999).
- 8 362 19. Tarailo-Graovac, M. & Chen, N. Using RepeatMasker to identify repetitive elements in
- 9 363 genomic sequences. In: Editorial board, Baxevanis Andreas D *et al.* (eds.), *Current Protocols*
- 10 364 *in Bioinformatics*, Chapter 4:Unit 4 10 (2009).
- 11 365 20. Jurka, J. *et al.* Repbase Update, a database of eukaryotic repetitive elements. *Cytogenetic*
- 12 366 *Genome Res* 110, 462–67 (2005).
- 13 367 21. Stanke, M. *et al.* AUGUSTUS: a web server for gene finding in eukaryotes. *Nucleic Acids*
- 14 368 *Res* 32(Web Server issue), W309-12 (2004).
- 15 369 22. Cai, Y. *et al.* Computational systems biology methods in molecular biology, chemistry
- 16 370 biology, molecular biomedicine, and biopharmacy. *BioMed Res Int* 2014, 746814 (2014).
- 17 371 23. Flicek, P. *et al.* Ensembl 2014. *Nucleic Acids Res* 42, D749-D755 (2014).
- 18 372 24. Gertz, E. M. *et al.* Composition-based statistics and translated nucleotide searches:
- 19 373 Improving the TBLASTN module of BLAST. *MBC Biology* 4, 41 (2006).
- 20 374 25. Birney, E. *et al.* GeneWise and Genomewise. *Genome Res* 14, 988-995 (2004).
- 21 375 26. Trapnell, C. *et al.* TopHat: discovering splice junctions with RNA-Seq. *Bioinformatics* 25,
- 22 376 105-1111 (2009).
- 23 377 27. Ghosh, S. & Chan, C. K. K. Analysis of RNA-Seq data using TopHat and Cufflinks. *Methods*
- 24 378 *Mole Biol* 1374, 339 (2016).
- 25 379 28. Campbell, M. S. *et al.* Genome Annotation and Curation Using MAKER and MAKER-P.
- 26 380 *Current Protocols in Bioinformatics* 48, 4.11.11 (2014).
- 27 381 29. Lobo, I. Basic Local Alignment Search Tool (BLAST). *J Mol Biol* 215, 403-410 (2008).
- 28 382 30. Harris, M. A. *et al.* The Gene Ontology (GO) database and informatics resource. *Nucleic*
- 29 383 *Acids Res* (2004).
- 30 384 31. Ogata, H. *et al.* KEGG: Kyoto Encyclopedia of Genes and Genomes. *Nucleic Acids Res* 27,



1  
2  
3  
4  
5  
6  
7  
8  
9  
10  
11  
12  
13  
14  
15  
16  
17  
18  
19  
20  
21  
22  
23  
24  
25  
26  
27  
28  
29  
30  
31  
32  
33  
34  
35  
36  
37  
38  
39  
40  
41  
42  
43  
44  
45  
46  
47  
48  
49  
50  
51  
52  
53  
54  
55  
56  
57  
58  
59  
60  
61  
62  
63  
64  
65

385 29-34 (2000).

386 32. Conesa, A. *et al.* Blast2GO: a universal tool for annotation, visualization and analysis in  
387 functional genomics research. *Bioinformatics* 21, 3674 (2005).

388 33. Lowe, T. M. & Eddy, S. R. tRNAscan-SE: a program for improved detection of transfer RNA  
389 genes in genomic sequence. *Nucleic Acids Res* 25, 955-964 (1997).

390 34. Griffiths-Jones, S. *et al.* Rfam: an RNA family database. *Nucleic Acids Res* 31, 439 (2003).

391 35. Lieberman-Aiden, E. *et al.* Comprehensive mapping of long-range interactions reveals  
392 folding principles of the human genome. *Science* 326, 289-293 (2009).

393 36. Rao, S.S.P. *et al.* A 3D map of the human genome at kilobase resolution reveals principles of  
394 chromatin looping. *Cell* 159, 1665-1680 (2014).

395 37. Flot, J.F. *et al.* Contact genomics: scaffolding and phasing (meta) genomes using  
396 chromosome 3D physical signatures. *FEBS Letters* 589, 2966-2974 (2015).

397 38. Burton, J.N. *et al.* Chromosome-scale scaffolding of de novo genome assemblies based on  
398 chromatin interactions. *Nat Biotechnol* 31, 1119-1125 (2013).

399 39. Lobo, I. Basic Local Alignment Search Tool (BLAST). *J Mol Biol* 215, 403-410 (2008).

400 40. Thompson, J. D. *et al.* Multiple sequence alignment using ClustalW and ClustalX. *Curr*  
401 *Protoc Bioinformatics* 2.3. 1-2.3. 22 (2002).

402 41. Guindon, S. *et al.* PhyML: Fast and Accurate Phylogeny Reconstruction by Maximum  
403 Likelihood. *Infect Genet Evol* 9, 384-385 (2009).

404 42. Yang, Z. & Rannala, B. Bayesian estimation of species divergence times under a molecular  
405 clock using multiple fossil calibrations with soft bounds. *Mol Biol Evol* 23, 212-226 (2006).

406 43. Hedges, S. B. *et al.* Tree of life reveals clock-like speciation and diversification. *Mol Biol*  
407 *Evol* 32, 835-845 (2015).

408

Table 1 Summary of *Oplegnathus fasciatus* genome assembly and annotation

| Genome assembly                      | values      |
|--------------------------------------|-------------|
| Contig N50 size (Mb)                 | 2.1         |
| Contig number                        | 1 692       |
| Scaffold N50 size (Mb)               | 33.5        |
| Scaffold N50 number                  | 24          |
| Total length (Mb)                    | 778.7       |
| Genome coverage (X)                  | 314.6       |
| Contig number ( $\geq 1$ Mb)         | 219         |
| Length of contig ( $\geq 1$ Mb) (bp) | 565 184 128 |
| The longest contig (bp)              | 8 891 851   |
| The longest scaffold (bp)            | 38 619 456  |
| Genome annotation                    |             |
| Protein-coding gene number           | 24 003      |
| Mean transcript length (kb)          | 16.1        |
| Mean exons per gene                  | 10.1        |
| Mean exon length (bp)                | 217.7       |
| Mean intron length (bp)              | 1527.4      |

Table 2 The detailed classification of repeat sequences of *Oplegnathus fasciatus*

| Type          | Rebase TEs  |             | TE proteins |             | De novo     |             | Combined TEs |             |
|---------------|-------------|-------------|-------------|-------------|-------------|-------------|--------------|-------------|
|               | Length (bp) | % in genome | Length (bp) | % in genome | Length (bp) | % in genome | Length (bp)  | % in genome |
| DNA           | 39 147 527  | 5.03        | 5 390 266   | 0.69        | 93 089 344  | 11.95       | 124 417 402  | 15.98       |
| LINE          | 23 983 322  | 3.08        | 16 460 762  | 2.11        | 57 167 551  | 7.34        | 85 761 250   | 11.01       |
| SINE          | 875 585     | 0.11        | 0           | 0.00        | 914 559     | 0.12        | 1 747 250    | 0.22        |
| LTR           | 10 163 601  | 1.31        | 5 770 483   | 0.74        | 31 126 639  | 4.00        | 42 465 968   | 5.45        |
| Satellite     | 2 028 992   | 0.26        | 0           | 0.00        | 2 613 480   | 0.34        | 4 361 048    | 0.56        |
| Simple_repeat | 1 556 026   | 0.20        | 0           | 0.00        | 5 179 965   | 0.67        | 6 386 303    | 0.82        |
| Other         | 6 545       | 0.00        | 0           | 0.00        | 0           | 0.00        | 6 545        | 0.00        |
| Unknown       | 331 430     | 0.04        | 0           | 0.00        | 20 636 768  | 2.65        | 20 967 052   | 2.69        |
| Total         | 73 544 786  | 9.44        | 27 613 880  | 3.55        | 183 954 095 | 23.62       | 250 611 845  | 32.18       |

Table 3 Hi-C libraries for chromosome-scale assembly of *Oplegnathus fasciatus*

| Chromosome | Number of contigs | Length of contigs | Length of chromosome |
|------------|-------------------|-------------------|----------------------|
| Chr1       | 36                | 19 852 463        | 19 869 963           |
| Chr2       | 51                | 34 905 999        | 34 930 999           |
| Chr3       | 43                | 33 654 321        | 33 675 321           |
| Chr4       | 74                | 35 290 762        | 35 327 262           |
| Chr5       | 54                | 38 592 956        | 38 619 456           |
| Chr6       | 72                | 38 156 734        | 38 192 234           |
| Chr7       | 60                | 35 029 969        | 35 059 469           |
| Chr8       | 64                | 37 546 719        | 37 578 219           |
| Chr9       | 45                | 31 457 603        | 31 479 603           |
| Chr10      | 52                | 35 302 682        | 35 328 182           |
| Chr11      | 80                | 31 971 344        | 32 010 844           |
| Chr12      | 46                | 30 287 574        | 30 310 074           |
| Chr13      | 52                | 33 665 353        | 33 690 853           |
| Chr14      | 101               | 31 190 130        | 31 240 130           |

|       |       |             |             |
|-------|-------|-------------|-------------|
| Chr15 | 48    | 30 038 946  | 30 062 446  |
| Chr16 | 59    | 28 825 591  | 28 854 591  |
| Chr17 | 33    | 28 220 078  | 28 236 078  |
| Chr18 | 50    | 26 754 155  | 26 778 655  |
| Chr19 | 52    | 34 380 882  | 34 406 382  |
| Chr20 | 52    | 25 675 509  | 25 701 009  |
| Chr21 | 64    | 31 397 692  | 31 429 192  |
| Chr22 | 63    | 30 492 179  | 30 523 179  |
| Chr23 | 70    | 33 514 462  | 33 548 962  |
| Chr24 | 51    | 31 930 140  | 31 956 140  |
| Total | 1 372 | 768 134 243 | 768 808 243 |

Table 4 Genome assembly of *Oplegnathus fasciatus* based on chromosome-length scaffolds

|                                              | Draft scaffolds | Chromosome-length scaffolds based on Hi-C |
|----------------------------------------------|-----------------|-------------------------------------------|
| Length of genome (bp)                        | 778 731 089     | 768 808 243                               |
| Number of contigs                            | 1 692           | 1 372                                     |
| Contigs N50 (bp)                             | 2 149 025       | 2 130 780                                 |
| Number of scaffold                           | /               | 24                                        |
| Scaffold N50 (bp)                            | /               | 33 548 962                                |
| Number of contigs ( $\geq 100$ kb)           | 693             | 708                                       |
| Total length of contigs ( $\geq 100$ kb)     | 735 235 962     | 732 827 446                               |
| Mapping rate of contigs ( $\geq 100$ kb) (%) | /               | 99.67                                     |

## Figure Legends

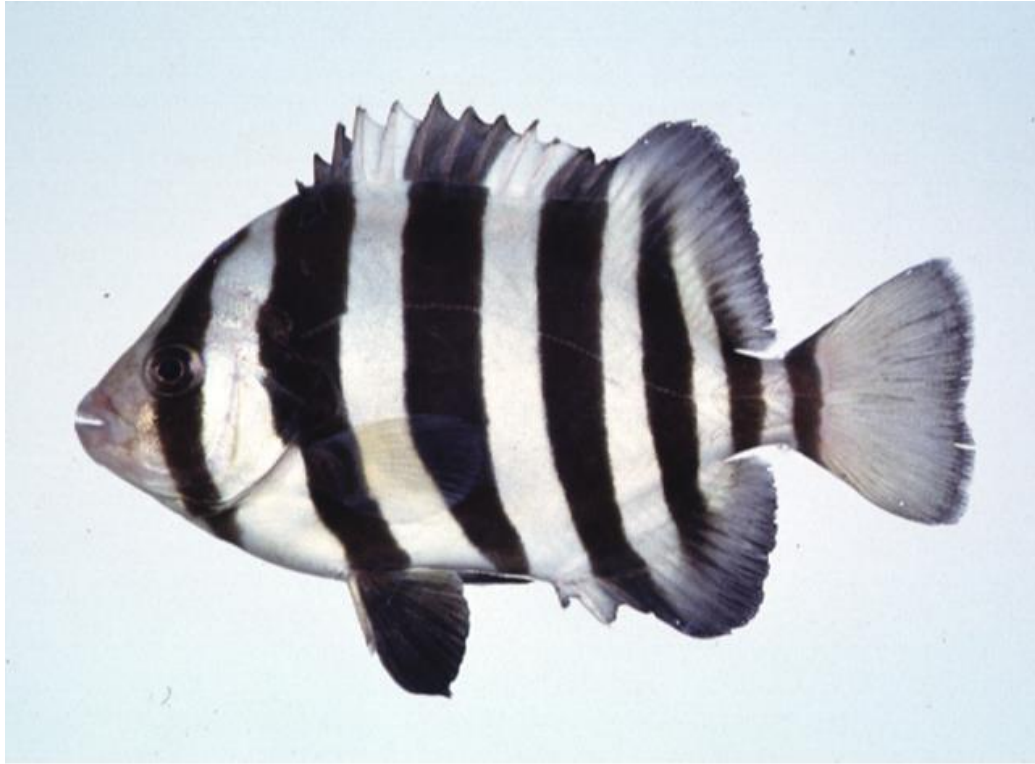

Fig. 1 A representative individual of *O. fasciatus*

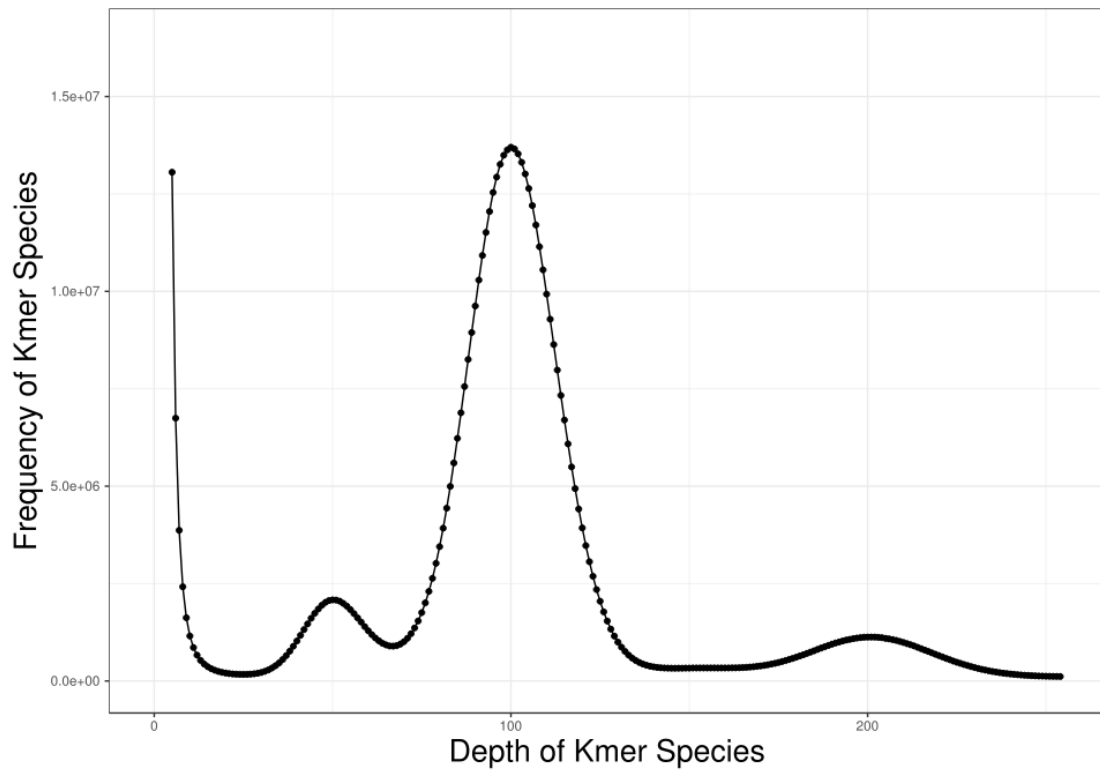

Fig. 2 *k*-mer distribution of the *O. fasciatus* genome



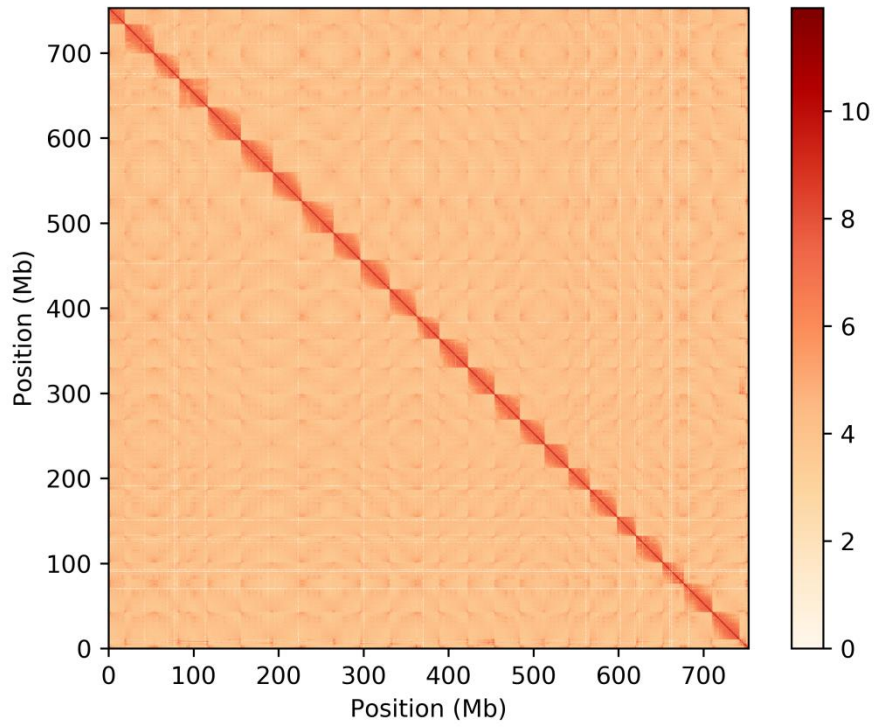

Fig. 3 Hi-C interaction heatmap for *O. fasciatus* reference genome, showing interactions between the 24 chromosomes

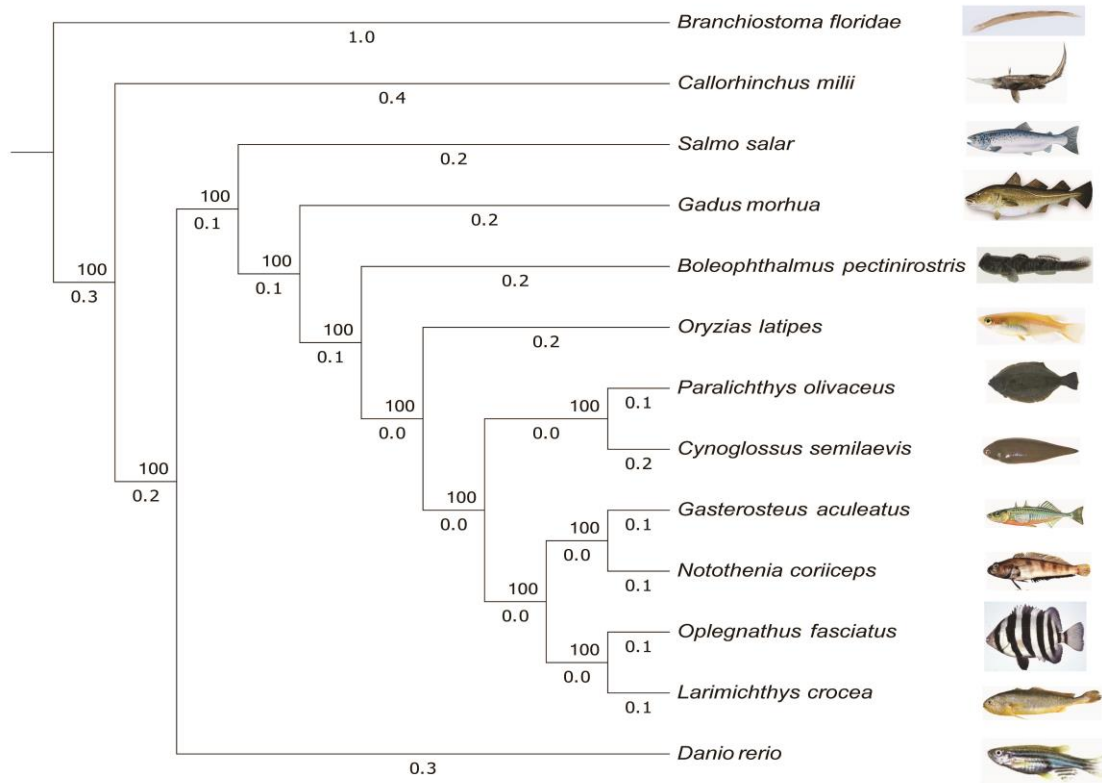

Fig. 4 The phylogenetic relationships of *O. fasciatus* with other fishes

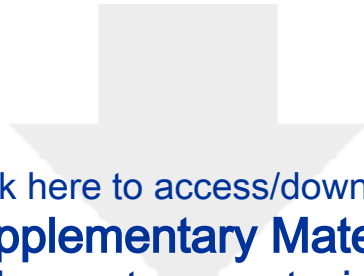

Click here to access/download  
**Supplementary Material**  
4-supplementary materials.docx

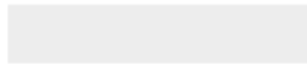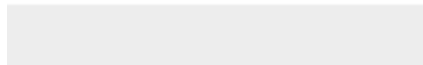

Supplement: giz013_giga-d-18-00300_original_submission.pdf [file giz013_giga-d-18-00300_original_submission.pdf]
