# Supplementary material for: Genome sequence of the barred knifejaw Oplegnathus fasciatus (Temminck & Schlegel, 1844): the first chromosome-level draft genome in the family Oplegnathidae
Source: PubMed Central journal article supplement (PMC6423371; doi:10.1093/gigascience/giz013), 2019-02-01

# GigaScience

## Genome sequence of the barred knifejaw *Oplegnathus fasciatus* (Temminck & Schlegel, 1884): the first chromosome-level draft genome in the family Oplegnathidae --Manuscript Draft--

|                                                      |                                                                                                                                                                                                                                                                                                                                                                                                                                                                                                                                                                                                                                                                                                                                                                                                                                                                                                                                                                                                                                                                                                                                                                                                                                                                                                                                                                                                                                                                                                                                                                                                                                                                                                                                                                                                                                                                                                                                                                                                                                                                                                                                                                                                                                                                                                                                                                                                                                                                                                                                                                                                                   |                     |
|------------------------------------------------------|-------------------------------------------------------------------------------------------------------------------------------------------------------------------------------------------------------------------------------------------------------------------------------------------------------------------------------------------------------------------------------------------------------------------------------------------------------------------------------------------------------------------------------------------------------------------------------------------------------------------------------------------------------------------------------------------------------------------------------------------------------------------------------------------------------------------------------------------------------------------------------------------------------------------------------------------------------------------------------------------------------------------------------------------------------------------------------------------------------------------------------------------------------------------------------------------------------------------------------------------------------------------------------------------------------------------------------------------------------------------------------------------------------------------------------------------------------------------------------------------------------------------------------------------------------------------------------------------------------------------------------------------------------------------------------------------------------------------------------------------------------------------------------------------------------------------------------------------------------------------------------------------------------------------------------------------------------------------------------------------------------------------------------------------------------------------------------------------------------------------------------------------------------------------------------------------------------------------------------------------------------------------------------------------------------------------------------------------------------------------------------------------------------------------------------------------------------------------------------------------------------------------------------------------------------------------------------------------------------------------|---------------------|
| <b>Manuscript Number:</b>                            | GIGA-D-18-00300R1                                                                                                                                                                                                                                                                                                                                                                                                                                                                                                                                                                                                                                                                                                                                                                                                                                                                                                                                                                                                                                                                                                                                                                                                                                                                                                                                                                                                                                                                                                                                                                                                                                                                                                                                                                                                                                                                                                                                                                                                                                                                                                                                                                                                                                                                                                                                                                                                                                                                                                                                                                                                 |                     |
| <b>Full Title:</b>                                   | Genome sequence of the barred knifejaw <i>Oplegnathus fasciatus</i> (Temminck & Schlegel, 1884): the first chromosome-level draft genome in the family Oplegnathidae                                                                                                                                                                                                                                                                                                                                                                                                                                                                                                                                                                                                                                                                                                                                                                                                                                                                                                                                                                                                                                                                                                                                                                                                                                                                                                                                                                                                                                                                                                                                                                                                                                                                                                                                                                                                                                                                                                                                                                                                                                                                                                                                                                                                                                                                                                                                                                                                                                              |                     |
| <b>Article Type:</b>                                 | Data Note                                                                                                                                                                                                                                                                                                                                                                                                                                                                                                                                                                                                                                                                                                                                                                                                                                                                                                                                                                                                                                                                                                                                                                                                                                                                                                                                                                                                                                                                                                                                                                                                                                                                                                                                                                                                                                                                                                                                                                                                                                                                                                                                                                                                                                                                                                                                                                                                                                                                                                                                                                                                         |                     |
| <b>Funding Information:</b>                          | Shandong Province Key Research and Invention Program (2017GHY15102, 2017GHY15106)                                                                                                                                                                                                                                                                                                                                                                                                                                                                                                                                                                                                                                                                                                                                                                                                                                                                                                                                                                                                                                                                                                                                                                                                                                                                                                                                                                                                                                                                                                                                                                                                                                                                                                                                                                                                                                                                                                                                                                                                                                                                                                                                                                                                                                                                                                                                                                                                                                                                                                                                 | Dr. Yongshuang Xiao |
|                                                      | Young Scientists Fund (41506170)                                                                                                                                                                                                                                                                                                                                                                                                                                                                                                                                                                                                                                                                                                                                                                                                                                                                                                                                                                                                                                                                                                                                                                                                                                                                                                                                                                                                                                                                                                                                                                                                                                                                                                                                                                                                                                                                                                                                                                                                                                                                                                                                                                                                                                                                                                                                                                                                                                                                                                                                                                                  | Dr. Yongshuang Xiao |
| <b>Abstract:</b>                                     | <p><b>Background</b><br/>The barred knifejaw (<i>Oplegnathus fasciatus</i>), a member of the Oplegnathidae family of the Centrarchiformes, is a commercially important rocky reef fish native to East Asia. <i>O. fasciatus</i> has become an important fishery resource for offshore cage aquaculture and fish stocking of marine ranching in China, Japan and Korea. Recently, sexual dimorphism in growth with neo-sex chromosome and widespread biotic diseases in <i>O. fasciatus</i> has been received increasing concern. However, adequate genome resources for gaining insight into sex-determining mechanisms and establishing genetically resistant breeding systems for <i>O. fasciatus</i> are lacking. Here, we analysed the entire genome of a female <i>O. fasciatus</i> fish using long-read sequencing and Hi-C data to generate chromosome-length scaffolds and a highly contiguous genome assembly.</p> <p><b>Findings</b><br/>We assembled the <i>O. fasciatus</i> genome with a total of 245.0 Gb of raw reads that were generated using both of PacBio Sequel and Illumina HiSeq 2000 platforms. The final draft genome assembly was approximately 778.7 Mb, which reached a high level of continuity with a contig N50 of 2.1 Mb. The genome size was consistent with the estimated genome size (777.5 Mb) based on k-mer analysis. We combined Hi-C data with a draft genome assembly to generate chromosome-length scaffolds. Twenty-four scaffolds corresponding to the twenty-four chromosomes were assembled to a final size of 768.8 Mb with a contig N50 of 2.1 Mb and a scaffold N50 of 33.5 Mb using 1,372 contigs. The identified repeat sequences accounted for 33.9% of the entire genome, and 24,003 protein-coding genes with an average of 10.1 exons per gene were annotated using de novo methods, with RNA-seq data and homologies to other teleosts. According to phylogenetic analysis using protein-coding genes, <i>O. fasciatus</i> is closely related to <i>Larimichthys crocea</i>, with <i>O. fasciatus</i> diverging from their common ancestor approximately 70.5-88.5 million years ago.</p> <p><b>Conclusions</b><br/>We generated a high-quality draft genome with chromosome assembly for <i>O. fasciatus</i> using long reads by using the PacBio sequencing technologies, which represents the first chromosome-level reference genome for Oplegnathidae species. Assembly of this genome will provide insight into sex-determining mechanisms and serve as a resource for accelerating genome-assisted improvements in resistant breeding systems.</p> |                     |
| <b>Corresponding Author:</b>                         | Yongshuang Xiao<br><br>CHINA                                                                                                                                                                                                                                                                                                                                                                                                                                                                                                                                                                                                                                                                                                                                                                                                                                                                                                                                                                                                                                                                                                                                                                                                                                                                                                                                                                                                                                                                                                                                                                                                                                                                                                                                                                                                                                                                                                                                                                                                                                                                                                                                                                                                                                                                                                                                                                                                                                                                                                                                                                                      |                     |
| <b>Corresponding Author Secondary Information:</b>   |                                                                                                                                                                                                                                                                                                                                                                                                                                                                                                                                                                                                                                                                                                                                                                                                                                                                                                                                                                                                                                                                                                                                                                                                                                                                                                                                                                                                                                                                                                                                                                                                                                                                                                                                                                                                                                                                                                                                                                                                                                                                                                                                                                                                                                                                                                                                                                                                                                                                                                                                                                                                                   |                     |
| <b>Corresponding Author's Institution:</b>           |                                                                                                                                                                                                                                                                                                                                                                                                                                                                                                                                                                                                                                                                                                                                                                                                                                                                                                                                                                                                                                                                                                                                                                                                                                                                                                                                                                                                                                                                                                                                                                                                                                                                                                                                                                                                                                                                                                                                                                                                                                                                                                                                                                                                                                                                                                                                                                                                                                                                                                                                                                                                                   |                     |
| <b>Corresponding Author's Secondary Institution:</b> |                                                                                                                                                                                                                                                                                                                                                                                                                                                                                                                                                                                                                                                                                                                                                                                                                                                                                                                                                                                                                                                                                                                                                                                                                                                                                                                                                                                                                                                                                                                                                                                                                                                                                                                                                                                                                                                                                                                                                                                                                                                                                                                                                                                                                                                                                                                                                                                                                                                                                                                                                                                                                   |                     |

|                                                |                                                                                                                                                                                                                                                                                                                                                                                                                                                                                                                                                                                                                                                                                                                                                                                                                                                                                                                                                                                                                                                                                                                                                                                                                                                                                                                                                                                                                                                                                                                                                                                                                                                                                                                                                                                                                                                                                                                                                                                                                                                                                                                                                                                                                                                                                                                                                                                                                                                                                                                                                                                                                                                                                                                                                                                                                                                                                                                                                                                                                                                                                                                                                                                                                                                                                                                                                                                                  |
|------------------------------------------------|--------------------------------------------------------------------------------------------------------------------------------------------------------------------------------------------------------------------------------------------------------------------------------------------------------------------------------------------------------------------------------------------------------------------------------------------------------------------------------------------------------------------------------------------------------------------------------------------------------------------------------------------------------------------------------------------------------------------------------------------------------------------------------------------------------------------------------------------------------------------------------------------------------------------------------------------------------------------------------------------------------------------------------------------------------------------------------------------------------------------------------------------------------------------------------------------------------------------------------------------------------------------------------------------------------------------------------------------------------------------------------------------------------------------------------------------------------------------------------------------------------------------------------------------------------------------------------------------------------------------------------------------------------------------------------------------------------------------------------------------------------------------------------------------------------------------------------------------------------------------------------------------------------------------------------------------------------------------------------------------------------------------------------------------------------------------------------------------------------------------------------------------------------------------------------------------------------------------------------------------------------------------------------------------------------------------------------------------------------------------------------------------------------------------------------------------------------------------------------------------------------------------------------------------------------------------------------------------------------------------------------------------------------------------------------------------------------------------------------------------------------------------------------------------------------------------------------------------------------------------------------------------------------------------------------------------------------------------------------------------------------------------------------------------------------------------------------------------------------------------------------------------------------------------------------------------------------------------------------------------------------------------------------------------------------------------------------------------------------------------------------------------------|
| <b>First Author:</b>                           | Yongshuang Xiao                                                                                                                                                                                                                                                                                                                                                                                                                                                                                                                                                                                                                                                                                                                                                                                                                                                                                                                                                                                                                                                                                                                                                                                                                                                                                                                                                                                                                                                                                                                                                                                                                                                                                                                                                                                                                                                                                                                                                                                                                                                                                                                                                                                                                                                                                                                                                                                                                                                                                                                                                                                                                                                                                                                                                                                                                                                                                                                                                                                                                                                                                                                                                                                                                                                                                                                                                                                  |
| <b>First Author Secondary Information:</b>     |                                                                                                                                                                                                                                                                                                                                                                                                                                                                                                                                                                                                                                                                                                                                                                                                                                                                                                                                                                                                                                                                                                                                                                                                                                                                                                                                                                                                                                                                                                                                                                                                                                                                                                                                                                                                                                                                                                                                                                                                                                                                                                                                                                                                                                                                                                                                                                                                                                                                                                                                                                                                                                                                                                                                                                                                                                                                                                                                                                                                                                                                                                                                                                                                                                                                                                                                                                                                  |
| <b>Order of Authors:</b>                       | Yongshuang Xiao                                                                                                                                                                                                                                                                                                                                                                                                                                                                                                                                                                                                                                                                                                                                                                                                                                                                                                                                                                                                                                                                                                                                                                                                                                                                                                                                                                                                                                                                                                                                                                                                                                                                                                                                                                                                                                                                                                                                                                                                                                                                                                                                                                                                                                                                                                                                                                                                                                                                                                                                                                                                                                                                                                                                                                                                                                                                                                                                                                                                                                                                                                                                                                                                                                                                                                                                                                                  |
|                                                | Zhizhong Xiao                                                                                                                                                                                                                                                                                                                                                                                                                                                                                                                                                                                                                                                                                                                                                                                                                                                                                                                                                                                                                                                                                                                                                                                                                                                                                                                                                                                                                                                                                                                                                                                                                                                                                                                                                                                                                                                                                                                                                                                                                                                                                                                                                                                                                                                                                                                                                                                                                                                                                                                                                                                                                                                                                                                                                                                                                                                                                                                                                                                                                                                                                                                                                                                                                                                                                                                                                                                    |
|                                                | Jing Liu                                                                                                                                                                                                                                                                                                                                                                                                                                                                                                                                                                                                                                                                                                                                                                                                                                                                                                                                                                                                                                                                                                                                                                                                                                                                                                                                                                                                                                                                                                                                                                                                                                                                                                                                                                                                                                                                                                                                                                                                                                                                                                                                                                                                                                                                                                                                                                                                                                                                                                                                                                                                                                                                                                                                                                                                                                                                                                                                                                                                                                                                                                                                                                                                                                                                                                                                                                                         |
|                                                | Daoyuan Ma                                                                                                                                                                                                                                                                                                                                                                                                                                                                                                                                                                                                                                                                                                                                                                                                                                                                                                                                                                                                                                                                                                                                                                                                                                                                                                                                                                                                                                                                                                                                                                                                                                                                                                                                                                                                                                                                                                                                                                                                                                                                                                                                                                                                                                                                                                                                                                                                                                                                                                                                                                                                                                                                                                                                                                                                                                                                                                                                                                                                                                                                                                                                                                                                                                                                                                                                                                                       |
|                                                | Jun Li                                                                                                                                                                                                                                                                                                                                                                                                                                                                                                                                                                                                                                                                                                                                                                                                                                                                                                                                                                                                                                                                                                                                                                                                                                                                                                                                                                                                                                                                                                                                                                                                                                                                                                                                                                                                                                                                                                                                                                                                                                                                                                                                                                                                                                                                                                                                                                                                                                                                                                                                                                                                                                                                                                                                                                                                                                                                                                                                                                                                                                                                                                                                                                                                                                                                                                                                                                                           |
| <b>Order of Authors Secondary Information:</b> |                                                                                                                                                                                                                                                                                                                                                                                                                                                                                                                                                                                                                                                                                                                                                                                                                                                                                                                                                                                                                                                                                                                                                                                                                                                                                                                                                                                                                                                                                                                                                                                                                                                                                                                                                                                                                                                                                                                                                                                                                                                                                                                                                                                                                                                                                                                                                                                                                                                                                                                                                                                                                                                                                                                                                                                                                                                                                                                                                                                                                                                                                                                                                                                                                                                                                                                                                                                                  |
| <b>Response to Reviewers:</b>                  | <p>GIGA-D-18-00300<br/> Genome sequence of rock bream, <i>Oplegnathus fasciatus</i> (Temminck &amp; Schlegel, 1884): the first draft genome in family Oplegnathidae<br/> Yongshuang Xiao; Zhizhong Xiao; Jing Liu; Daoyuan Ma; Jun Li<br/> GigaScience</p> <p>Dear Dr. Xiao,</p> <p>Your manuscript "Genome sequence of rock bream, <i>Oplegnathus fasciatus</i> (Temminck &amp; Schlegel, 1884): the first draft genome in family Oplegnathidae" (GIGA-D-18-00300) has been assessed by our reviewers. Although it is of interest, we are unable to consider it for publication in its current form. The reviewers have raised a number of points which we believe would improve the manuscript and may allow a revised version to be published in GigaScience. In particular it needs significant editing by a native English speaker as the language needs a lot of work. Please also include details on common names of the species and NCBI taxon/Fishbase IDs, and other identifiers in the paper.</p> <p>Reply:</p> <p>We would like to give sincere thanks to the editor's suggestions. In order to check the accurate species information, we have checked the taxonomy information from the WORMS (World Register of Marine Species) <a href="http://www.marinespecies.org/aphia.php?p=search">http://www.marinespecies.org/aphia.php?p=search</a>, Wikipedia <a href="https://www.wikipedia.org/">https://www.wikipedia.org/</a>, NCBI <a href="https://www.ncbi.nlm.nih.gov/Taxonomy/Browser/wwwtax.cgi?id=163133">https://www.ncbi.nlm.nih.gov/Taxonomy/Browser/wwwtax.cgi?id=163133</a> and Fishes of the World (Fifth Edition) (Joseph S. Nelson, Terry C. Grande and Mark V. Wilson), and all of them supported the taxonomy of the Oplegnathidae. The Oplegnathidae occupied one genus composed of seven species <i>Oplegnathus conwayi</i> (Richardson, 1840), <i>Oplegnathus fasciatus</i> (Temminck &amp; Schlegel, 1844), <i>Oplegnathus insignis</i> (Kner, 1867), <i>Oplegnathus pealopesi</i> (Smith, 1947), <i>Oplegnathus punctatus</i> (Temminck &amp; Schlegel, 1844), <i>Oplegnathus robinsoni</i> (Regan, 1916), <i>Oplegnathus woodwardi</i> (Waite, 1900).</p> <p>Their reports, together with any other comments, are below. Please also take a moment to check our website at <a href="https://giga.editorialmanager.com/">https://giga.editorialmanager.com/</a> for any additional comments that were saved as attachments.</p> <p>If you are able to fully address these points, we would encourage you to submit a revised manuscript to GigaScience. Once you have made the necessary corrections, please submit online at:</p> <p><a href="https://giga.editorialmanager.com/">https://giga.editorialmanager.com/</a></p> <p>If you have forgotten your username or password please use the "Send Login Details" link to get your login information. For security reasons, your password will be reset.</p> <p>Please include a point-by-point within the 'Response to Reviewers' box in the submission system. Please ensure you describe additional experiments that were carried out and include a detailed rebuttal of any criticisms or requested revisions that you disagreed with. Please also ensure that your revised manuscript conforms to the journal style, which can be found in the Instructions for Authors on the journal homepage.</p> |

The due date for submitting the revised version of your article is 08 Jan 2019.

I look forward to receiving your revised manuscript soon.

Best wishes,

Hongling Zhou  
GigaScience  
www.gigasciencejournal.com

Reviewer reports:

Reviewer #1: This manuscript describes the genome assembly and annotation of *O. fasciatus*, with little else by way of analysis. The methods used are mostly appropriate, and the assembly appears to be of high quality.

Some issues and suggestions:

1. The assembly contiguity is repeatedly referred to as 'remarkable', this is perhaps an exaggeration. These values are not extraordinary in the age of long-read sequencing. S Table 4 lists other fish assemblies, but includes almost no current-generation ones, flattering the assembly statistics obtained in this study.

Reply:

We would like to give sincere thanks to the reviewer's suggestions. We have thoroughly revised the manuscript for the description of the quality of the genome assembly. And we have deleted the degree word of "remarkable" as follows:

1) We revised the "which reached a remarkable high level of continuity with contig N50 of 2.1 Mb" as "which reached a high level of continuity with a contig N50 of 2.1 Mb".

2) We revised the "which reached a remarkable high level of continuity with contig N50 length of 2.1 Mb" as "which reached a high level of continuity and a contig N50 of 2.1 Mb".

3) We revised the "which showed a remarkable high level of continuity with contig" as "which showed a high level of continuity with a contig".

4) We revised the "which reached a remarkable high level of continuity with contig" as "which reached a high level of continuity with a contig".

5) We revised the "The contig N50 was remarkable longer than those of most fish" as "Contig N50 was longer than those of most fish".

Line 336-338: Meanwhile, we have highlighted that the important role of long reads in the contig continuity of genome assembly in the text as follows: "Previous studies illuminated the relationship between read length and genome assembly; therefore, we attributed the continuity of the genome primarily to the application of long reads in the assembly".

Table 4: According to the reviewer's comments, we also added the current-generation of other fish assemblies in the Table 4, which included *Lepisosteus oculatus* (Genome Size: 945 Mb, Contig N50: 0.07Mb, Scaffold N50: 6.9Mb), *Sillago sinica* (Genome Size: 534 Mb, Contig N50: 2.6Mb), *Lates calcarifer* (Genome Size: 586 Mb, Contig N50: 1.07Mb, Scaffold N50: 25.85Mb), *Oreochromis niloticus* (Genome Size: 868 Mb, Contig N50: 3.3Mb, Scaffold N50: 37Mb).

2. I will admit I am not an expert on Oplegnathidae. However, according to Wikipedia, the genus *Oplegnathus* contains seven species, and the common name for *O. fasciatus* is 'striped beakfish' or 'barred knifejaw'. The manuscript claims two species (line 68), and the common name 'rock bream'.

Reply:

We agreed with the reviewer's comment on the taxonomy of the Oplegnathidae. The Oplegnathidae occupied one genus composed of seven species *Oplegnathus conwayi* (Richardson, 1840), *Oplegnathus fasciatus* (Temminck & Schlegel, 1844), *Oplegnathus insignis* (Kner, 1867), *Oplegnathus pealopesi* (Smith, 1947), *Oplegnathus punctatus* (Temminck & Schlegel, 1844), *Oplegnathus robinsoni* (Regan, 1916), *Oplegnathus woodwardi* (Waite, 1900). We have checked the taxonomy information from the WORMS (World Register of Marine Species) <http://www.marinespecies.org/aphia.php?p=search>, Wikipedia

<https://www.wikipedia.org/>, NCBI <https://www.ncbi.nlm.nih.gov/Taxonomy/Browser/wwwtax.cgi?id=163133> and *Fishes of the World* (Fifth Edition) (Joseph S. Nelson, Terry C. Grande and Mark V. Wilson), and all of them supported the taxonomy of the Oplegnathidae. It's our mistake in the text for the verification of species numbers. We know two (*Oplegnathus fasciatus* and *O. punctatus*) of seven species existed in the coastal waters of East Asia. We also checked the common name of *O. fasciatus*, the common name of rock bream is incorrect and we revised it as "barred knifejaw" based on the reviewer's comments, NCBI and Wikipedia. We also revised it in the text. We used the common name "barred knifejaw" instead of "rock bream" in the text.

3. Line 109: 'a repeat content of 38.46%', how was this calculated? It does not follow from figure 2.

Reply: The K-mer distribution from the sequencing data could be used for the genome size, heterozygosity and repeat content ratio estimation, mainly from the relative numbers of homozygous, heterozygous and repeated Kmers, using the statistical model described in the previous study (Liu, B. et al. Estimation of genomic characteristics by analyzing k-mer frequency in de novo genome projects. *Quantitative Biology* 35, 62-67 (2013)). We have illuminated the peaks raised by homozygous, heterozygous and repeated K-mers in Figure 2.

4. Line 107/111: The k-mer estimate and the initial assembly yield exactly the same genome size (808.9 Mbp). This is highly unlikely, especially if the genome is highly repetitive, as claimed here.

Reply:

We would like to give sincere thanks to reviewer's suggestions. We have carefully checked our sequencing results and found there was a clerical error in the text.

Line 286: According to the estimation of K-mer, the genome size is 786.46Mb, and after eliminating the influence of K-mer error, we get the genome size is 777.5Mb.

Line 289: According to the assembly of platanus, the contig N50 is 7.19kb with total length of 875.4Mb. And then reached to the level of scaffold N50 is 84.126kb with total length of 744.53Mb.

So, it is a clerical error in the text, and we have revised them in the text.

5. Line 123: I assume the contigs and scaffold listed here, to which the HiC data map, are those of the final (PacBio-based) assembly. However, the only assembly that has been described at this point is the highly fragmented initial one. Perhaps you could restructure this so that the HiC sequencing is described after PacBio sequencing.

Reply:

The reviewer is correct. The genome used here for the Hi-C data evaluation is the genome assembled from the PacBio sequencing data. We moved this part after the PacBio sequencing data assembly.

6. Figure 2 shows a clear bump corresponding to duplicated k-mers (at 200). Is this duplication level still relevant for the final assembly? For example, a lot of sequence is removed (line 136) based on redundancy, and a large fraction of PacBio reads do no map to the final assembly (line 158). Is there a relation with the sex chromosome configuration (X1X1X2X2, line 76)?

Reply: We agree with the reviewer's comment on the repeat content of the final assembly. We noticed that the repeat content of final genome were about 33.9%, which was lower than that from the genome survey estimation (38.5%). The high repetitive elements in repeated regions of chromosomes, such as those in the sex chromosome, might result into fragmented assembly. Those repeated sequences might be removed in the redundancy elimination process. We have added the discussion into our revised manuscript as follows:

Line 437-440: "Note that the mapping ratio might be related to the repetitive content of the *O. fasciatus* genome, especially for the high repeat content in the sex chromosomes<sup>6</sup>. However, how the repetitive elements in the genome influence the karyotypes of this species needs further investigation."

7. Line 140: That the polishing is performed using Pilon should be mentioned here (it is

mentioned in S table 2). Also, 'using NGS data' is ambiguous, as PacBio also qualifies as NGS. This probably refers to Illumina only.

Reply: Thanks a lot for the reviewer's suggestion. We have added the description of Pilon for the sequence polishing in the manuscript. "Using NGS data" referred to Illumina data only here, we therefore clarify the sentence in the manuscript as follows: "The resulting genome assembly was further polished using Illumina NGS data"

8. Figure 4 and S Figure 4 analyze *O. fasciatus* in the context of 'fish species'. While this is technically correct, it is biologically not always the most relevant comparison. Fish species such as ghost shark and lancelet are included, but for example tetrapods (which are more closely related to *O. fasciatus* than the aforementioned fish) are not. In figure 4, these make for less appropriate outgroups (because of their very distant relationship to the other, teleost, fish species). I would suggest including at least e.g. spotted gar to the analysis to fill this gap (and perhaps omit *B. floridae*).

Reply: We agree with the reviewer. We have added the spotted gar and deleted *B. floridae* in our phylogenetic analysis, and re-performed the gene family construction and phylogenetic analysis. The result of phylogeny including the spotted gar was consistent with reviewer's prospection, which filled the gap from the fish evolution process in our study. We would like to give sincere thanks to reviewer's suggestions. The revised phylogenetic results were illuminated in the Figure 4.

8. Figure 4 needs more information in the legend. What do the numbers mean exactly, and how were they calculated? The conclusion drawn from this figure (line 266) is not appropriate, as the phylogenetic position of Notothenioidei is not relevant to the narrative of this manuscript, and reclassification needs more evidence than this sparse phylogenetic tree.

Reply: Thanks a lot for the reviewer's suggestion. We have added more information in the legends for the Figure 4. The descriptions of the phylogenetic analysis were revised in the manuscript. And we agree with the reviewer's suggestion that the phylogenetic position of Notothenioidei is not relevant to the narrative of our manuscript and we deleted it.

9. One of the motivations for sequencing this genome is understanding the fish' sex determining system. This aim is not revisited in the results or Conclusion. How does the choice of a female individual for genome sequencing affect this goal?

Reply:

Thanks a lot for the reviewer's suggestion. We have added the sentence for the importance of genome in our following genetic studies to understand the sex-determining system of the fish species. The reason we chose a female one for the genome assembly because the female ones do not have heterotropic chromosome, which might facilitate the chromosome assembly of X1 and X2. The quality of X1 and X2 could lay a solid foundation for the chromosome analysis in our following studies. We have added the discussion in the conclusion as follows: "As far as we known, the Y chromosomes has always exhibited many specific sequence characteristics compared to X1 and X2, such as repeat content, and those differences might increase the difficulty of the sequence assembly of chromosomes X1 and X2. The chromosome-level genome assembly together with gene annotation data generated for the female fish in this work will provide a valuable resource for further research on sex-determining mechanisms, especially for obtaining an accurate assembly of the Y chromosome in male fish. These results will also accelerate genome-wide association studies in resistant breeding systems."

Typos:

L 102 Hieq -> HiSeq

L 172 RepeatMasker -> RepeatMasker

Reply: Thanks for the reminding from the reviewer. We have revised it in the text.

Reviewer #2: In this manuscript Xiao et al. reports the genome assembly of the rock bream (*O. fasciatus*) a species of increasing economic importance in Asia. This species exhibits sex dimorphism in growth and also a sex determination system based on multiple sex chromosomes X1X1X2X2/X1X2Y, which makes it interesting species to study. The draft genome of the rock bream will be a valuable resource to facilitate

future research aimed at improving relevant traits and understanding of determination systems.

The authors used an adequate amount of sequence data from three different sources (Illumina short reads, PacBio and Hi-C), which allowed them to generate a robust genome assembly. Furthermore, the authors annotated the genome using multiple strategies. Finally, they carried out some phylogenetic analyses including other fish species. The methods followed to obtain the assembly are good in general, and well described.

L33-L35 Please re-phrase, maybe say "sexual dimorphism in growth"

Reply: Thanks a lot for the reviewer's suggestion

Line 37-38 According to the reviewer's comments, we revised the "growth of sexual dimorphism with neo-sex chromosome and widespread biotic" as "sexual dimorphism in growth with neo-sex chromosome and widespread biotic".

L37 ...basing -> based

Reply: Thanks a lot for the reviewer's suggestion, we have revised the manuscript in the text. We revised the "basing" as "based".

L43 "...We assembled the O.fasciatus" <genome?>

Reply: Thanks a lot for the reviewer's suggestion, we have revised the manuscript in the text. We added the "genome" after the "O.fasciatus"

L77 Again please re-phrase "the growth sexual dimorphism"

Reply: Thanks a lot for the reviewer's suggestion, we have revised the manuscript in the text. We revised the "the growth sexual dimorphism" as "sexual dimorphism in growth".

L99-L100 "A whole genome using Illumina DNA seq..." re-phrase

Reply: According to the reviewer's comments, we have revised the manuscript in the text. We revised the "A whole-genome using Illumina DNA sequencing technology was applied to estimate O. fasciatus genome size." as "The whole-genome size of O. fasciatus was estimated based on the Illumina DNA sequencing technology".

L115 Was the blood extracted from the same fish used for pacBio and Illumina?

Reply: Thanks a lot for the reviewer's question. In order to avoid the genetic-background influence of individual difference, especially for the HI-C result, the blood was extracted from the same female fish of O. fasciatus used for pacBio and Illumina.

L162 "the results showed <that> 99.8%..."

Reply: Thanks a lot for the reviewer's suggestion, we have revised the manuscript in the text. We added the "that" after the "showed" as "the result showed that 99.8%....."

L172 Typo Repeatmasker

Reply: We have revised the manuscript in the text. We revised the "Repeatmasker" as "RepeatMasker".

L252 Is not clear how you came up to those 812 orthogroups, and the same for L256

Reply: 21,528 gene families were constructed from the gene family clustering. However, most of the gene families contained more than one gene for species in our studies. To eliminate uncertain effects for the phylogenetic analysis from duplicated genes, we only selected gene families that contain one and only one genes for each species. In our case we obtained 1236 gene families (1236 genes) for the phylogenetic analysis. After removing short gene (length shorter than 100 amino acid (about 300bp)), we obtained 1158 genes for the final analysis.

L266 I don't think the authors should claim that the Notothenioidei should be elevated to the order level, but I would accept that their results suggest or show evidence of this.

Reply: Thanks a lot for the reviewer's suggestion. We have revised our conclusion from the phylogenetic analysis. Indeed, we cannot claim the phylogenetic position of Notothenioidei from our data, but our result could provide useful knowledge for the related studies. We think that the phylogenetic position of Notothenioidei is not relevant to the narrative of our manuscript and we deleted it.

General Comments:

There are many issues with the English throughout the manuscript and these must be

addressed before considering for publication. I strongly encourage the authors to proof-read the manuscript before re-submitting.

Reply: Thanks for the editor's suggestion. We have revised the English throughout the manuscript with the service of AJE (American Journal Experts). We hoped that the English now could meet the standard for the GigaScience. The revision places as follows:

Line 1 we revised "Genome sequence of barred knifejaw,..." as "Genome sequence of the barred knifejaw,...".

Line 3 we revised "the first draft genome in family Oplegnathidae" as "the first chromosome-level draft genome in the family Oplegnathidae".

Line 33 we revised "The barred knifejaw (*Oplegnathus fasciatus*),..." as "The barred knifejaw *Oplegnathus fasciatus*,...".

Line 34 we revised "commercially" as "commercially".

Line 38 we revised "has received" as "has been received".

Line 39-40 we revised the sentence "However, the adequate genome resources to make insight into sex-determining mechanism and to establish genetically based resistant breeding systems for *O. fasciatus* have been lacking." as "However, adequate genome resources for gaining insight into sex-determining mechanisms and establishing genetically based resistant breeding systems for *O. fasciatus* are lacking."

Line 41-43 we revised the sentence "we performed whole genome of female fish for *O. fasciatus* using long-read sequencing and Hi-C data to generate chromosome-length scaffolds with highly contiguous genome assembly." as "we analysed the entire genome of a female *O. fasciatus* fish using long-read sequencing and Hi-C data to generate chromosome-length scaffolds and a highly contiguous genome assembly."

Line 45 we revised ", which" as "that".

Line 46 we revised "both of" as "both the". And we also revised the "Hiseq" as "HiSeq".

Line 48 we added "a" in front of "contig N50".

Line 49-53 we revised the sentence as "We combined Hi-C data with a draft genome assembly to generate chromosome-length scaffolds. Twenty-four scaffolds corresponding to the twenty-four chromosomes were assembled to a final size of 768.8 Mb with a contig N50 of 2.1 Mb and a scaffold N50 of 33.5 Mb using 1,372 contigs." .

Line 53 we revised "account" as "accounted".

Line 55 we revised "annotated using de novo method and" as "annotated using de novo methods, ".

Line 55 we revised "homologies" as "homology". We also revised "with draft" as "with a draft".

Line 56 we deleted both of "the" and "the".

Line 57-58 we revised the sentence "was close related to *Larimichthys crocea* and *O. fasciatus* diverged from their ancestor was at about 70.3-87.3 million years ago." as "is closely related to *Larimichthys crocea*, with *O. fasciatus* diverging from their common ancestor approximately 70.3-87.3 million years ago".

Line 60 we revised the sentence "We generated high-quality draft genome and chromosomes assembly" as "We generated a high-quality draft genome with chromosome assembly".

Line 146 we revised "is" as "represents".

Line 147-149 we revised the sentence "The genome assembly will provide insight into sex-determining mechanism and serve as a resource for accelerating the genome-assisted improvement of resistant breeding systems." as "Assembly of this genome will provide insight into sex-determining mechanisms and serve as a resource for accelerating genome-assisted improvements in resistant breeding systems."

Line 154 we revised "The family Oplegnathidae belongs" as "The Oplegnathidae family".

Line 155 we revised "including only one genus *Oplegnathus* comprised of" as "including only one genus *Oplegnathus*, which is comprised of".

Line 156 we revised "two (*O. fasciatus* and *O. punctatus*) of which" as "two of which (*O. fasciatus* and *O. punctatus*)".

Line 157 we revised "commercial values in East Aisa" as "commercially valuable in East Asia".

Line 158 we deleted "," in both sides of "*O. fasciatus* (Temminck & Schlegel, 1844)".

Line 158 we revised "the two" as "these two".

Line 159 we revised "meters" as "metres".

Line 160 we revised "being distributed in" as "and distributed across".

Line 163-164 we revised "It was reported that the male of *Oplegnathus* has a neo-sex chromosome" as "It has been reported that the male *Oplegnathus* possesses a neo-

sex chromosome”.

Line 164 we revised “, and the” as “. The”.

Line 165 we revised “was” as “is”.

Line 166 we deleted “the” in front of “karyotype analyses”.

Line 166 we revised the “was” as “has been”.

Line 167 we revised “and the male fish showed a faster growth advantage than the female” as “, with male fish exhibiting faster growth than females”. We also revised “may” as “possibly”.

Line 168 we revised “of” as “in”.

Line 171 we revised “for making” as “to gain”. We also revised “accelerating” as “to accelerate”.

Line 172 we revised “improvement of” as “improvements in”.

Line 173 we revised “So far, the genome sequence with the chromosomes assembly” as “So far, a genome sequence with the chromosomal assembly”.

Line 263 we revised “Here we performed” as “Here, we constructed”.

Line 264 we deleted “constructed”.

Line 265 we revised “using” as “used”.

Line 266 we revised “assemblyer Canu” as “assembly program Canu”. We also revised “the” as “this”.

Line 267 we revised “the family Oplegnathidae” as “the Oplegnathidae family”.

Line 270 we revised “improvement of” as “improvements in”.

Line 273 we added “sequencing using” in front of “the Illumina platform”.

Line 276 we revised “sample of” as “samples from”.

Line 277 we deleted “the”.

Line 280 we added “the” in front of “Illumina HiSeq X Ten platform”.

Line 281 we added “the” before “removal of low-quality and redundant reads”.

Line 282 we revised “about” as “approximately”.

Line 283 we deleted “the” in front of “cleaned reads”.

Line 284 we revised “about” as “approximately”.

Line 285 we added “was” in front of “at a depth of 100”.

Line 287 we revised “the” as “an”.

Line 290 we revised “contig N50 7.2 kb and scaffold N50 84.1kb” as “contig N50 of 7.2 kb and a scaffold N50 of 84.1kb”.

Line 292 we added “,” in front of “partly due to”. We also revised “genomics” as “genomic”.

Line 317 we added “the” in front of “PacBio”.

Line 318 we revised “obtain” as “obtained”.

Line 319 we revised “totally 62.8 Gb” as “62.8 Gb in total”. We also revised “a read N50” as “an N50 read”.

Line 321 we revised “The Canu” as “Canu”.

Line 322-323 we revised “As a result, a total length of 875.9 Mb genome assembly was achieved for *O. fasciatus*” as “As a result, a genome assembly with a total length of 875.9 Mb was constructed for *O. fasciatus*”.

Line 323 we deleted “which was”.

Line 324 we revised “the estimated genome size in 17-mer analysis” as “the genome size estimated by 17-mer analysis”.

Line 325 we revised “relative” as “relatively”.

Line 325-326 we revised “the complexity of genome such as heterozygosity” as “the complexity of this genome to factors such as heterozygosity”.

Line 327 we revised “and obtain genome” as “to obtain a”.

Line 328 we revised “the Arrow of Smrtlink 5.0” as “the Arrow tool in SMRT Link 5.0 software”.

Line 329 we deleted “the” in front of “the error correction”.

Line 335 we revised “technologies, and is comparable with” as “technologies and is comparable to”.

Line 341-342 we revised “depended strongly on” as “are strongly dependent upon”.

Line 395-396 we revised the sentence “The genomic DNA for Hi-C library was extracted from the whole-blood cell of *O. fasciatus* as described” as “Genomic DNA was extracted for the Hi-C library from a whole-blood sample of *O. fasciatus* as described”.

Line 397 we revised “digested” as “was digested”.

Line 397 we revised “biotin-labeled” as “biotin-labelled”.

Line 401 we added “were produced” in front of “with Q20 and”.

Line 402 we added “the” in front of “Hi-C data”.



Line 407 we revised “other” as “more”.

Line 409 we revised “those” as “these sequences”.

Line 411 we revised “interactions map” as “the interaction map”.

Line 413 we revised “contigs” as “polished contigs”.

Line 414 we added “were assembled” in front of “corresponding to”.

Line 419 we revised “reached” as “attained”.

Line 427 we added “assembled” in front of “sequences”.

Line 431 we deleted “both of”.

Line 433 we deleted “the” in front of “Minimap2”.

Line 434 we deleted “the” in front of “CLR”.

Line 435 we revised “checked for” as “assessed in the”.

Line 436-437 we revised “sequencing depth were reached to 90.2%, 99.9% and 80.6” as “sequencing depth reached 90.2%, 99.9% and 80.6”.

Line 441-442 we added “the” in front of “O. fasciatus” and “whole-genome” respectively.

Line 443 we deleted “the” in the front of “GATK”. We also deleted “the” in front of “SNP”.

Line 444 we revised “the result” as “and the results”.

Line 445 we revised “heterozygosis and homology” as “heterozygous and homologous”.

Line 446 we revised “yield” as “yielded”.

Line 447 we revised “the estimate from k-mer” as “the k-mer estimate analysis”.

Line 449 we revised “Repeat sequence” as “Repeat sequences”.

Line 502 we deleted “the” in front of “TE-related proteins”.

Line 504 we revised “account” as “accounted”.

Line 505 we revised “included” as “including”.

Line 509 we revised “The long interspersed nuclear elements (LINE) and long terminal repeat (LTR)” as “Long interspersed nuclear elements (LINEs) and long terminal repeats (LTRs)”.

Line 510 we revised “took up 7.3% and 4.0% of the whole genome” as “comprised 7.3% and 4.0% of the whole genome, respectively”.

Line 512 we added “that were” in front of “used for”.

Line 513-514 we revised “High quality of RNA were detected” as “RNA quality was determined”.

Line 514 we added “ratio of ” in front of “absorbance”.

Line 515 we added “using a” in front of “Nanodrop ND-1000”.

Line 516 we added “a” in front of “2100 Bioanalyzer”.

Line 517 we deleted “the process of” in front of “reverse transcription”.

Line 518 we revised “The” as “A”. We also deleted “the manual of” in front of “the Paired-End Sample”.

Line 519 we revised “the library” as “a library”.

Line 525 we revised “prediction” as “predictions”.

Line 527 we revised “of” as “in the”.

Line 530 we revised “to” as “the”.

Line 583 we deleted “the”.

Line 586 we revised “then we” as “we then”. We also deleted “the” in front of “gene”.

Line 589 we added “the” in front of “O. fasciatus genome”.

Line 591 we revised “in” as “of”.

Line 593-596 we revised the sentence “In order to further obtain functional annotation of the protein-coding genes in O. fasciatus genome, we employed local BLASTX and BLASTN programs to align upon the non-redundant protein (NR), non-redundant nucleotide (NT) and Swissprot database with an e-value  $\leq 1e-5$ ” as “To obtain further functional annotation of the protein-coding genes in the O. fasciatus genome, we employed the local BLASTX and BLASTN programs and the Swiss-Prot database with an e-value  $\leq 1e-5$  to align the non-redundant nucleotides (NT) and the non-redundant proteins (NR), respectively”.

Line 597 we revised “Kyoto Encyclopedia of Genes” as “and Kyoto Encyclopaedia of Genes”.

Line 598 we revised “Finally” as “Ultimately”.

Line 601 we added “the” in front of “tRNAscan-SE”.

Line 609 we revised “gene family” as “gene families”.

Line 610 we revised “of” as “the”.

Line 611 we revised “in” as “using”.

Line 774 we revised “relationship” as “relationships”.

Line 775 we revised “single-copy gene” as “single-copy genes”.  
Line 776 we revised “length filter” as “a length filter”. We also deleted “, respectively”.  
Line 778 we revised “sequence of each species” as “sequences for each species”.  
Line 782 we deleted “a” in front of “molecular clock”.  
Line 784-785 we revised “were clustered together with Larimichthys crocea belonged to” as “clustered with Larimichthys crocea in”.  
Line 787 we revised “about” as “approximately”.  
Line 788 we revised “Conclusion” as “Conclusions”.  
Line 791-793 we revised the sentence as “The final draft genome assembly is approximately 778.7 Mb, which was slightly higher than the estimated genome size (777.5 Mb) based on k-mer analysis”.  
Line 793-795 we revised the sentence as “Those contigs were scaffolded to chromosomes using Hi-C data, resulting a genome with a high level of continuity with a contig N50 of 2.1 Mb and a scaffold N50 of 33.5 Mb.”.  
Line 799-800 We revised the sentence “We found the divergence time between *O. fasciatus* and the common ancestor with *Larimichthys crocea* was at about 70.3-87.3 Ma” as “We found that the divergence time between *O. fasciatus* and its the common ancestor with *Larimichthys crocea* was approximately 70.3-87.3 Ma”.

I wonder why the authors chose to sequence a female fish, while the male fish could have had provided the full sequence of the Y chromosome which could've brought insights into sex determination, the identification of sex specific regions, etc. I mention this because you stress that the genome assembly is useful for the understanding of these mechanisms this but then there's no mention of this important topic in the discussion.

Reply:

Thanks for the editor’s concerns. We indeed have a plan for the genome assembly for a male one, after this female genome work. The reason we choose a female one because of the heterotropic chromosome in males. As far as we known, Y chromosomes exhibited lots of specific sequence characters, such as repeat content, comparing to X1 and X2, and those differences might increase the difficulty for the sequence assembly of chromosome X1 and X2. Based on this genome, the male genome assembly will be carried out in the following work, with the aim to get the accurate assembly of Y chromosome.

We have added the discussion in the conclusion in line 364-386 as follows: “As far as we known, the Y chromosomes has always exhibited many specific sequence characteristics compared to X1 and X2, such as repeat content, and those differences might increase the difficulty of the sequence assembly of chromosomes X1 and X2. The chromosome-level genome assembly together with gene annotation data generated for the female fish in this work will provide a valuable resource for further research on sex-determining mechanisms, especially for obtaining an accurate assembly of the Y chromosome in male fish. These results will also accelerate genome-wide association studies in resistant breeding systems.”

Reviewer3:

Further to my previous email, another referee noted that Oplegnathidae is no longer a part of the Perciformes, according to the Betancur-R et al. 2017 phylogenetic classification of fishes, who placed it in the Centrarchiformes. Please also include this detail in the introduction.

Reply:

Thanks for the editor’s suggestions. We have carefully checked the two papers (Betancur-R. R, Broughton RE, Wiley EO, Carpenter K, López JA, Li C, Holcroft NI, Arcila D, Sanciangco M, Cureton II JC, Zhang F, Buser T, Campbell MA, Ballesteros JA, Roa-Varon A, Willis S, Borden WC, Rowley T, Reneau PC, Hough DJ, Lu G, Grande T, Arratia G, Ortí G. The Tree of Life and a New Classification of Bony Fishes. PLOS Currents Tree of Life. 2013 and Ricardo Betancur-R, Edward O. Wiley, Gloria Arratia, Arturo Acero, Nicolas Bailly, Masaki Miya, Guillaume Lecointre and Guillermo Ortí. Phylogenetic classification of bony fishes. 2017) and the book (Fishes of the World (Fifth Editon) (Joseph S. Nelson, Terry C. Grande and Mark V. Wilson)). We agreed with the reviewer’s suggestion and we also agreed with the molecular taxonomy results. We have revised the information in the abstract, introduction and Gene family identification and phylogenetic tree construction sections of the text. We have referenced the paper in the discussion section,

**Additional Information:**

| Question                                                                                                                                                                                                                                                                                                                                                                                                                                                                                                                            | Response   |
|-------------------------------------------------------------------------------------------------------------------------------------------------------------------------------------------------------------------------------------------------------------------------------------------------------------------------------------------------------------------------------------------------------------------------------------------------------------------------------------------------------------------------------------|------------|
| <p>Are you submitting this manuscript to a special series or article collection?</p>                                                                                                                                                                                                                                                                                                                                                                                                                                                | <p>No</p>  |
| <p><b>Experimental design and statistics</b></p> <p>Full details of the experimental design and statistical methods used should be given in the Methods section, as detailed in our <a href="#">Minimum Standards Reporting Checklist</a>. Information essential to interpreting the data presented should be made available in the figure legends.</p> <p>Have you included all the information requested in your manuscript?</p>                                                                                                  | <p>Yes</p> |
| <p><b>Resources</b></p> <p>A description of all resources used, including antibodies, cell lines, animals and software tools, with enough information to allow them to be uniquely identified, should be included in the Methods section. Authors are strongly encouraged to cite <a href="#">Research Resource Identifiers</a> (RRIDs) for antibodies, model organisms and tools, where possible.</p> <p>Have you included the information requested as detailed in our <a href="#">Minimum Standards Reporting Checklist</a>?</p> | <p>Yes</p> |
| <p><b>Availability of data and materials</b></p> <p>All datasets and code on which the conclusions of the paper rely must be either included in your submission or deposited in <a href="#">publicly available repositories</a> (where available and ethically appropriate), referencing such data using a unique identifier in the references and in the “Availability of Data and Materials” section of your manuscript.</p>                                                                                                      | <p>Yes</p> |

Have you have met the above requirement as detailed in our [Minimum Standards Reporting Checklist?](#)

[Click here to view linked References](#)

1 **Genome sequence of the barred knifejaw *Oplegnathus***  
2 ***fasciatus* (Temminck & Schlegel, 1884): the first**  
3 **chromosome-level draft genome in the family Oplegnathidae**

4  
5 Yongshuang Xiao<sup>1,2,3\*</sup> †, Zhizhong Xiao<sup>1,2,3</sup> †, Daoyuan Ma<sup>1,2,3</sup>, Jing Liu<sup>2,3\*</sup>, Jun  
6 Li<sup>1,2,3\*</sup>

7 <sup>1</sup>CAS Key Laboratory of Experimental Marine Biology, Institute of Oceanology,  
8 Chinese Academy of Sciences, 7 Nanhai Road, Qingdao, 266071, China, <sup>2</sup>Laboratory  
9 for Marine Biology and Biotechnology, Qingdao National Laboratory for Marine  
10 Science and Technology, 7 Nanhai Road, Qingdao, 266071, China, <sup>3</sup>Center for Ocean  
11 Mega-Science, Chinese Academy of Sciences, 7 Nanhai Road, Qingdao, 266071,  
12 China

13  
14  
15  
16  
17  
18 \*Correspondence address: Yongshuang Xiao, Mega-Science, Chinese Academy of  
19 Sciences, 7 Nanhai Road, Qingdao, 266071, China; Tel: +86-053282896729; E-mail:  
20 dahaishuang1982@163.com; Jing Liu, Institute of Oceanology, Chinese Academy of  
21 Sciences, 7 Nanhai Road, Qingdao, 266071, China; Tel: +86-053282898790; E-mail:  
22 jliu@qdio.ac.cn; Jun Li, Institute of Oceanology, Chinese Academy of Sciences, 7  
23 Nanhai Road, Qingdao, 266071, China; Tel: +86-053282898718; E-mail:  
24 junli@qdio.ac.cn.

25 †Contributed equally to this work.

26  
27  
28  
29  
30  
31  
32  
33  
34  
35  
36  
37  
38  
39  
40  
41  
42  
43  
44  
45  
46  
47  
48  
49  
50  
51  
52  
53  
54  
55  
56  
57  
58  
59  
60  
61  
62  
63  
64  
65

1 29

2 30

3 31 **Abstract**

4 32 **Background**

5 33 The barred knifejaw (*Oplegnathus fasciatus*), a member of the Oplegnathidae family  
6 34 of the Centrarchiformes, is a commercially important rocky reef fish native to East  
7 35 Asia. *O. fasciatus* has become an important fishery resource for offshore cage  
8 36 aquaculture and fish stocking of marine ranching in China, Japan and Korea. Recently,  
9 37 sexual dimorphism in growth with neo-sex chromosome and widespread biotic  
10 38 diseases in *O. fasciatus* has been received increasing concern. However, adequate  
11 39 genome resources for gaining insight into sex-determining mechanisms and  
12 40 establishing genetically resistant breeding systems for *O. fasciatus* are lacking. Here,  
13 41 we analysed the entire genome of a female *O. fasciatus* fish using long-read  
14 42 sequencing and Hi-C data to generate chromosome-length scaffolds and a highly  
15 43 contiguous genome assembly.

16 44 **Findings**

17 45 We assembled the *O. fasciatus* genome with a total of 245.0 Gb of raw reads that were  
18 46 generated using both of PacBio Sequel and Illumina HiSeq 2000 platforms. The final  
19 47 draft genome assembly was approximately 778.7 Mb, which reached a high level of  
20 48 continuity with a contig N50 of 2.1 Mb. The genome size was consistent with the  
21 49 estimated genome size (777.5 Mb) based on *k*-mer analysis. We combined Hi-C data  
22 50 with a draft genome assembly to generate chromosome-length scaffolds. Twenty-four  
23 51 scaffolds corresponding to the twenty-four chromosomes were assembled to a final  
24 52 size of 768.8 Mb with a contig N50 of 2.1 Mb and a scaffold N50 of 33.5 Mb using  
25 53 1,372 contigs. The identified repeat sequences accounted for 33.9% of the entire  
26 54 genome, and 24,003 protein-coding genes with an average of 10.1 exons per gene  
27 55 were annotated using *de novo* methods, with RNA-seq data and homologies to other  
28 56 teleosts. According to phylogenetic analysis using protein-coding genes, *O. fasciatus*  
29 57 is closely related to *Larimichthys crocea*, with *O. fasciatus* diverging from their  
30 58 common ancestor approximately 70.5-88.5 million years ago.

## 59 **Conclusions**

60 We generated a high-quality draft genome with chromosome assembly for *O.*  
61 *fasciatus* using long reads by using the PacBio sequencing technologies, which  
62 represents the first chromosome-level reference genome for Oplegnathidae species.  
63 Assembly of this genome will provide insight into sex-determining mechanisms and  
64 serve as a resource for accelerating genome-assisted improvements in resistant  
65 breeding systems.

66 *Keywords:* *Oplegnathus fasciatus*; chromosome-level genome assembly; Hi-C  
67 assembly; sex-determining mechanism

## 68 **Data description**

### 69 **Introduction of *O. fasciatus***

70 The Oplegnathidae family belongs to the order Centrarchiformes, including only one  
71 genus *Oplegnathus*, which is comprised of seven species (*O. conwayi*, *O. fasciatus*, *O.*  
72 *insignis*, *O. peaolopesi*, *O. punctatus*, *O. robinsoni*, *O. woodwardi*), two of which (*O.*  
73 *fasciatus* and *O. punctatus*) are commercially valuable in East Asia. The barred  
74 knifejaw *O. fasciatus* (Temminck & Schlegel, 1844) is one of these two species in the  
75 *Oplegnathus*, which is commonly found at the depth of one to ten metres in  
76 association with rocky reefs<sup>1,2</sup>, and distributed across a wide range of shallow waters  
77 around Korea, Japan, China and Hawaii<sup>1,3,4</sup> (Fig. 1). *O. fasciatus* has become an  
78 important fishery resource for offshore cage aquaculture and fish stocking of marine  
79 ranching in China, Japan and Korea<sup>5</sup>. It has been reported that the male of  
80 *Oplegnathus* possesses a neo-sex chromosome, possibly a sex chromosome Y. The  
81 sex chromosome system for *Oplegnathus* is considered to be X<sub>1</sub> X<sub>1</sub> X<sub>2</sub> X<sub>2</sub> / X<sub>1</sub> X<sub>2</sub> Y  
82 based on karyotype analyses<sup>6,7</sup>. Furthermore, sexual dimorphism in growth has been  
83 detected in the *O. fasciatus*, with male fish exhibiting faster growth than females,  
84 possibly be due to the sex chromosome system in *Oplegnathus*<sup>8</sup>. *O. fasciatus* is  
85 vulnerable to viruses (e.g., Iridovirus) and genetic degradation caused by inbreeding  
86 has led to higher susceptibility to diseases<sup>9,10</sup>. It is vital to develop genomic resources  
87 to gain insight into sex-determining mechanisms and to accelerate the

88 genome-assisted improvements in resistant breeding systems.

89 So far, a genome sequence with the chromosomal assembly of *O. fasciatus* has  
90 not been reported. Here, we constructed a high-quality chromosome-level reference  
91 genome assembly for *O. fasciatus* using long reads by using the PacBio DNA  
92 sequencing platform and used a genome assembly strategy by taking advantage of  
93 genome assembly program Canu<sup>11</sup>. This genome assembly of *O. fasciatus* is the first  
94 chromosome-level reference genome constructed for the Oplegnathidae family. The  
95 completeness and continuity of the genome will provide high quality genomic  
96 resources for studies on sex-determining mechanisms and for accelerating the  
97 genome-assisted improvements in resistant breeding systems.

### 99 **Genomic DNA extraction, genome size estimation**

100 High-quality genomic DNA for sequencing using the Illumina platform (Illumina Inc.,  
101 San Diego, CA, USA) and PacBio Sequel sequencing (Pacific Biosciences of  
102 California, Menlo Park, CA, USA) was extracted from fresh muscle tissue and blood  
103 samples from a single female *O. fasciatus*. The fish was collected from the near-shore  
104 area of Qingdao city (Yellow Sea), Shandong province. The whole-genome size of *O.*  
105 *fasciatus* was estimated based on Illumina DNA sequencing technology. A short-insert  
106 library (300~350 bp) was constructed and generated a total of ~90.7 Gb of raw reads  
107 using the standard protocol provided by the Illumina HiSeq X Ten platform (Illumina  
108 Inc., San Diego, CA, USA). After the removal of low-quality and redundant reads, we  
109 obtained approximately ~80.8 Gb of clean data for *de novo* assembly to estimate the  
110 whole-genome size (S Table 1, Fig. 2). All cleaned reads were subjected to 17-mer  
111 frequency distribution analysis<sup>12</sup>. As the total number of *k*-mers was approximately  
112  $8.09 \times 10^{10}$  and the peak of *k*-mers was at a depth of 100, the genome size of *O.*  
113 *fasciatus* was calculated to be 777.5 Mb using the following formula with amendment:  
114 genome size = *k*-mer number / peak depth (Fig. 2). Meanwhile, an estimated  
115 heterozygosity of 0.29% and a repeat content of 38.46% were detected for *O.*  
116 *fasciatus* in this work. A pilot genome assembly was approximately 744.5 Mb with a  
117 contig N50 of 7.2 kb and a scaffold N50 of 84.1kb using the Illumina data and the



1 118 assembly program Platanus package<sup>13</sup> (S Table 2). The GC content was 41% (S Fig.  
2 119 1). This genome assembly was of low-quality, partly due to its high genomic repeat  
3  
4 120 content.  
5  
6 121

## 8 122 **Genome assembly using PacBio long reads**

10 123 Two 20 kb genomic DNA libraries were constructed and sequenced using the PacBio  
11 124 Sequel platform, generating 62.9 Gb raw DNA reads. We obtained 4.8 million  
12  
13 125 subreads (62.8 Gb in total) with an N50 read length of ~22 kb after removing adaptor  
14  
15 126 (S Table 1).  
16  
17

18  
19 127 Canu v1.4 was firstly used to assemble the genome with the  
20  
21 128 Corrected-Error-Rate parameter set at 0.040<sup>11</sup>. As a result, a genome assembly with a  
22  
23 129 total length of 875.9 Mb was constructed for *O. fasciatus*, slightly higher than the  
24  
25 130 genome size estimated by 17-mer analysis based on the Illumina data (S Table 2). We  
26  
27 131 attributed the relatively large genome size of the assembly to the complexity of this  
28  
29 132 genome to factors such as heterozygosity. We therefore applied Redundans v0.13c<sup>14</sup>  
30  
31 133 to remove the sequence redundancy to obtain a genome assembly size of 778.0 Mb.  
32  
33 134 We then used the Arrow tool in SMRT Link 5.0 software with the minCoverage  
34  
35 135 parameter set at 15 to implement error correction based on the PacBio long reads data  
36  
37 136 (Table 1). The resulting genome assembly was further polished using Illumina NGS  
38  
39 137 data, which were used in the genome survey analysis above. The final draft genome  
40  
41 138 assembly was 778.7 Mb, which reached a high level of continuity with a contig N50  
42  
43 139 length of 2.1 Mb (Table 1). The contig N50 of *O. fasciatus* was much higher than  
44  
45 140 those of previous fish genome assemblies constructed using NGS DNA sequencing  
46  
47 141 technologies and is comparable to those of recently reported model fish species (S  
48  
49 142 table 3). Previous studies illuminated the relationship between read length and  
50  
51 143 genome assembly; therefore, we attributed the continuity of the genome primarily to  
52  
53 144 the application of long reads in the assembly.  
54  
55

## 56 145 **Hi-C library construction and chromosome assembly**

58 146 Hi-C is a sequencing-based approach for determining chromosome interactions by  
59  
60 147 calculating the contact frequency between pairs of loci, which are strongly dependent  
61  
62  
63  
64  
65

1 148 upon the one-dimensional distance, in base pairs, between a pair of loci<sup>15, 16</sup>. In this  
2  
3 149 work, we used Hi-C to construct the genome assembly of *O. fasciatus*.

4 150 Genomic DNA was extracted for the Hi-C library from a whole-blood sample of  
5  
6 151 *O. fasciatus* as described<sup>17</sup>. Cells were fixed with formaldehyde and lysed, and the  
7  
8 152 cross-linked DNA was digested with MboI. Sticky ends were biotin-labelled and  
9  
10 153 proximity ligated to form chimeric junctions and then physically sheared to a size of  
11  
12 154 300–500 bp<sup>17</sup>. Chimeric fragments representing the original cross-linked,  
13  
14 155 long-distance physical interactions were then processed into paired-end sequencing  
15  
16 156 libraries, and 629 million 150-bp paired-end Illumina reads (91.5 Gb) were produced  
17  
18 157 with Q20 and Q30 of ~94.0% (S Table 1, S Table 4). By mapping the Hi-C data to the  
19  
20 158 PacBio-based assembly using BWA software, we found that sequencing data with  
21  
22 159 mates mapped to a different contig (or scaffold) and data mapped to a different contig  
23  
24 160 (or scaffold) (map Q5  $\geq$  5) were 593.7 Mb (94.4%), 240.5 Mb (40.5%) and 205.1  
25  
26 161 Mb (34.6%), respectively (S Table 4). We then further employed BWA and Lachesis  
27  
28 162 software to align paired-end reads to filter all base sequences than 500bp from each  
29  
30 163 restriction site<sup>18</sup>. According to the conduct of clustering, ordering, and orienting to the  
31  
32 164 assembly contigs (1,692), these sequences were grouped into 24 chromosome clusters  
33  
34 165 and scaffolded using Lachesis software with tuned parameters<sup>19</sup> (Table 2, Fig. 3).  
35  
36 166 Finally, we constructed the chromosome interactions map using Juicer software and  
37  
38 167 employed the JucieBox to complete the visual correction of the interaction map. We  
39  
40 168 obtained polished 1,756 polished contigs by interrupting misassembly from 1,692  
41  
42 169 contigs. Twenty-four scaffolds were assembled corresponding to the 24 chromosomes  
43  
44 170 of *O. fasciatus* based on the karyotype analyses<sup>6, 7</sup> (Table 2, Fig. 3).

45  
46  
47 171 A final size of 768.8 Mb accounting for the 98.7% draft genome was assembled,  
48  
49 172 which showed a high level of continuity with a contig N50 of 2.1 Mb and a scaffold  
50  
51 173 N50 of 33.5 Mb using 1,372 contigs. The anchor rate of contigs (> 100 kb) to  
52  
53 174 chromosomes was attained up to the 99.7% based on the Hi-C assembly (Table 3).  
54  
55 175 The contig N50 and scaffold N50 of *O. fasciatus* were much higher than those of  
56  
57 176 previous fish genome assemblies constructed using NGS DNA sequencing  
58  
59 177 technologies based on the genome assembly using PacBio long reads and Hi-C  
60  
61  
62  
63  
64  
65

178 assembly (S table 3).

179

## 180 **Genome quality evaluation**

181 To assess the completeness of the assembled *O. fasciatus* genome, we subjected the  
182 assembled sequences to BUSCO version 3 evaluation (BUSCO, actinopterygii\_odb9)  
183 <sup>20</sup>. Overall, 96.6% and 1.5% of the 4,584 expected actinopterygii genes were  
184 identified in the assembled genome as complete and partial BUSCO profiles,  
185 respectively. Approximately 85 genes could be considered missing in our assembly (S  
186 table 5). Among the expected complete actinopterygii genes, 4,259 and 171 were  
187 identified as single copy and duplicated BUSCOs, respectively (S table 5). We then  
188 used Minimap2 to estimate the completeness and homogeneity of genome assembly  
189 based on CLR (Continuous Long Reads) subreads. A high quality of completeness  
190 and homogeneity was assessed in the genome assembly, and the mapping rate,  
191 coverage rate and average sequencing depth reached 90.2%, 99.9% and 80.6,  
192 respectively (S table 6). Note that the mapping ratio might be related to the repetitive  
193 content of the *O. fasciatus* genome, especially for the high repeat content in the sex  
194 chromosomes<sup>6</sup>. However, how the repetitive elements in the genome influence the  
195 karyotypes of this species needs further investigation.

196 To further evaluate the accuracy of the *O. fasciatus* genome assembly, we  
197 aligned the NGS-based short reads from the whole-genome sequencing data against  
198 the reference genome using BWA<sup>21</sup>. We then used GATK to implement SNP calling  
199 and filter work, and the results showed that 99.8% and 0.2% of the  $1.6 \times 10^6$  expected  
200 SNP reads were identified in the assembled genome as heterozygous and homologous  
201 SNPs, respectively. SNP calling on the final assembly also yielded a heterozygosity  
202 rate of 0.20%, supporting the *k*-mer estimate analysis (0.29%) (S table 7).

203

## 204 **Repeat sequences within the *O. fasciatus* genome assembly**

205 To identify tandem repeats, we utilized Tandem Repeat Finder to annotate repetitive  
206 elements in the *O. fasciatus* genome. RepeatModeler (version 1.04) and  
207 LTR\_FINDER<sup>22</sup> were used to construct a *de novo* repeat library with default

1  
2  
3  
4  
5  
6  
7  
8  
9  
10  
11  
12  
13  
14  
15  
16  
17  
18  
19  
20  
21  
22  
23  
24  
25  
26  
27  
28  
29  
30  
31  
32  
33  
34  
35  
36  
37  
38  
39  
40  
41  
42  
43  
44  
45  
46  
47  
48  
49  
50  
51  
52  
53  
54  
55  
56  
57  
58  
59  
60  
61  
62  
63  
64  
65

1 208 parameters. Subsequently, we used RepeatMasker<sup>23</sup> (version 3.2.9) to map our  
2 209 assembled sequences on the Repbase TE (version 14.04)<sup>24</sup> and the *de novo* repeat  
3 210 library to identify known and novel transposable elements (TEs). In addition,  
4 211 TE-related proteins were annotated by using RepeatProteinMask software (version  
5 212 3.2.2)<sup>23</sup>.

6 213 The identified repeat sequences accounted for 33.9% of the *O. fasciatus* genome  
7 214 including repeat sequences with 23.6% of the genome based on the *de novo* repeat  
8 215 library (Table 4). Approximately 23.4% of the *O. fasciatus* genome was identified as  
9 216 interspersed repeats (most often TEs). Among them, DNA transposable elements were  
10 217 the most abundant type of repeat sequences, which occupied 11.5% of the whole  
11 218 genome. Long interspersed nuclear elements (LINEs) and long terminal repeats (LTRs)  
12 219 comprised 7.3% and 4.0% of the whole genome, respectively (Table 4, S Fig. 2).

## 13 220 **RNA preparation and sequencing**

14 221 We sequenced cDNA libraries prepared from the eggs of *O. fasciatus* that were used  
15 222 for genome annotation using Illumina sequencing technologies. RNA quality was  
16 223 determined based on the estimation of the ratio of absorbance at 260nm/280nm (OD =  
17 224 2.0) and the RIN (value = 9.2) by using a Nanodrop ND-1000 spectrophotometer  
18 225 (LabTech, USA) and a 2100 Bioanalyzer (Agilent Technologies, USA), respectively.  
19 226 We used the Clontech SMARTer cDNA synthesis kit to complete reverse transcription.  
20 227 A paired-end library was prepared following the Paired-End Sample Preparation Kit  
21 228 manual (Illumina Inc., San Diego, CA, USA). Finally, a library with an insert length  
22 229 of 300 bp was sequenced by Illumina HiSeq X Ten in 150PE mode (Illumina Inc., San  
23 230 Diego, CA, USA). As a result, we obtained ~42.2 Gb high-quality transcriptome data  
24 231 from RNA-seq (S Table 1, S table 8).

## 25 232 **Gene annotation**

26 233 Gene annotation of the *O. fasciatus* genome was performed using *de novo*,  
27 234 homology-based and transcriptome sequencing-based predictions. We employed  
28 235 Augustus (version 2.5.5)<sup>25</sup> and GenScan (version 1.0)<sup>26</sup> software to predict  
29 236 protein-coding genes in the *O. fasciatus* genome assembly. Protein sequences of

1 237 closely related fish species including *Larimichthys crocea*, *Lates calcarifer*,  
2 238 *Gasterosteus aculeatus*, *Paralichthys olivaceus*, *Cynoglossus semilaevis* and *Gadus*  
3  
4 239 *morhua* were downloaded from Ensembl<sup>27</sup> and aligned against the *O. fasciatus*  
5  
6 240 genome using TBLASTN software<sup>28</sup>. Subsequently, Genewise2.2.0 software<sup>29</sup> was  
7  
8 241 employed to predict potential gene structures on all alignments.

10 242 We also mapped these NGS transcriptome short reads onto our genome assembly  
11  
12 243 using TopHat1.2 software<sup>30</sup>, and then we employed Cufflinks<sup>31</sup> to predict gene  
13  
14 244 structures (S table 9). All gene models were then integrated using MAKER to obtain a  
15  
16 245 consensus gene set<sup>32</sup>. The final total gene set was composed of 24,003 genes with an  
17  
18 246 average of 10.1 exons per gene in the *O. fasciatus* genome (Table 1). The gene  
19  
20 247 number, gene length distribution, CDS length distribution, exon length distribution  
21  
22 248 and intron length distribution were all comparable with those of other teleost fish  
23  
24 249 species (S table 9, S Fig. 3).

27 250 To obtain further functional annotation of the protein-coding genes in the *O.*  
28  
29 251 *fasciatus* genome, we employed the local BLASTX and BLASTN programs and the  
30  
31 252 Swiss-prot database with an e-value  $\leq 1e-5$ <sup>33</sup> to align the non-redundant nucleotide  
32  
33 253 (NT) and non-redundant protein (NR), respectively. We also used Blast2GO software  
34  
35 254 to search the Gene ontology (GO), and Kyoto Encyclopaedia of Genes and Genomes  
36  
37 255 (KEGG) pathway databases<sup>34, 35, 36</sup>. Ultimately, 97.3% (23,364 genes) of the 24,003  
38  
39 256 genes were annotated by at least one database (S Table 10). Four types of non-coding  
40  
41 257 RNAs (microRNAs, transfer RNAs, ribosomal RNAs, and small nuclear RNAs) were  
42  
43 258 also annotated using the tRNAscan-SE and the Rfam database in this study<sup>37, 38</sup> (S  
44  
45 259 Table 11).

### 260 **Gene family identification and phylogenetic tree construction**

50 261 We employed the BLASTP program<sup>39</sup> with an e-value threshold of 1e-5 to identify  
51  
52 262 gene families based on the transcript alignments of each gene from *O. fasciatus* and  
53  
54 263 other fish species, which included *Larimichthys crocea*, *Gadus morhua*, *Paralichthys*  
55  
56 264 *olivaceus*, *Cynoglossus semilaevis*, *Notothenia coriiceps*, *Boleophthalmus*  
57  
58 265 *pectinirostris*, *Lepisosteus oculatus*, *Gasterosteus aculeatus*, *Callorhinchus milii*,  
59  
60 266 *Danio rerio*, *Salmo salar* and *Oryzias latipes*. 21,528 gene families were identified by  
61  
62  
63  
64  
65

1 267 clustering the homologous gene sequences based on H-scores calculated from  
2 268 Bit-score using Hcluster\_sg software (S Fig. 4). Subsequently, we selected 1,236  
3 269 single-copy orthogroups from the above-mentioned species to construct the  
4 270 phylogenetic relationship between *O. fasciatus* and other fish species. We used the  
5 271 ClustalW program<sup>40</sup> to extract and align coding sequences of single-copy genes from  
6 272 the 1,158 orthogroups with a length filter (S Fig. 5). All the alignments were  
7 273 concatenated as a single data set for each species. Nondegenerated sites extracted  
8 274 from the data set were then joined into new sequences for each species to construct a  
9 275 phylogenetic tree based on the maximum-likelihood method implemented in the  
10 276 PhyML package<sup>41</sup> (with the -m PROTGAMMAAUTO model). We used the  
11 277 MCMCtree program to estimate divergence times among species based on the  
12 278 approximate likelihood method<sup>42</sup> and a molecular clock data from the divergence time  
13 279 between medaka from the TimeTree database<sup>43</sup>. According to the phylogenetic  
14 280 analysis, *O. fasciatus* (Eupercaria: Centrarchiformes) clustered with *Larimichthys*  
15 281 *crocea* in the order Perciformes (Eupercaria), which was consistent with the new fish  
16 282 species taxonomy<sup>44</sup> (Fig. 4). The divergence time between *O. fasciatus* and the  
17 283 common ancestor with *Larimichthys crocea* was at approximately 70.5-88.5 Ma.

## 284 **Conclusions**

285 We successfully assembled the genome of *O. fasciatus* and reported the first  
286 chromosome-level genome sequencing, assembly and annotation based on long reads  
287 from the third-generation PacBio Sequel sequencing platform. The final draft genome  
288 assembly is approximately 778.7 Mb, which was slightly higher than the estimated  
289 genome size (777.5 Mb) based on *k*-mer analysis. Those contigs were scaffolded to  
290 chromosomes using Hi-C data, resulting a genome with a high level of continuity with  
291 a contig N50 of 2.1 Mb and a scaffold N50 of 33.5 Mb. The chromosome-level  
292 genome assembly of *O. fasciatus* was the first high-quality genome in the  
293 Oplegnathidae family. We also predicated 24,003 protein-coding genes from the  
294 generated assembly, and 97.3% (23,364 genes) of all protein-coding genes were  
295 annotated. We found that the divergence time between *O. fasciatus* and its the  
296 common ancestor with *Larimichthys crocea* was approximately 70.5-88.5 Ma. As far

1 297 as we known, the Y chromosomes has always exhibited many specific sequence  
2 298 characteristics compared to X1 and X2, such as repeat content, and those differences  
3  
4 299 might increase the difficulty of the sequence assembly of chromosomes X1 and X2.  
5  
6 300 The chromosome-level genome assembly together with gene annotation data  
7  
8 301 generated for the female fish in this work will provide a valuable resource for further  
9  
10 302 research on sex-determining mechanisms, especially for obtaining an accurate  
11  
12 303 assembly of the Y chromosome in male fish. These results will also accelerate  
13  
14 304 genome-wide association studies in resistant breeding systems.  
15  
16  
17 305

### 18 306 **Ethics Statement**

19 307 This research was approved by the Animal Care and Use committee of Chinese  
20  
21 308 Academic Science. All participates consent the study under the 'Ethics, consent and  
22  
23 309 permissions' heading. All participants consent to publish the work under the 'Consent  
24  
25 310 to publish' heading.  
26  
27  
28  
29 311

### 30 312 **Availability of supporting data**

31 313 Supporting data and materials are available in the GigaScience GigaDB database,  
32  
33 314 with the raw sequences deposited in the SRA under the accession number SRP158313  
34  
35 315 and SRP160016.  
36  
37  
38  
39 316

### 40 317 **Competing interests**

41 318 The authors declare that they have no competing interests.  
42  
43  
44  
45 319

### 46 320 **Funding**

47 321 This study was supported by a grant from the National Natural Science Foundation of  
48  
49 322 China (No. 41506170, No. 31672672, and No. 31872195), Shandong Province Key  
50  
51 323 Research and Invention Program (2017GHY15102, 2017GHY15106), Qingdao  
52  
53 324 Source Innovation Program (17-1-1-57-jch), STS (2017, 2018), Marine Fishery  
54  
55 325 Institute of Zhejiang Province, Key Laboratory of Mariculture and Enhancement of  
56  
57 326 Zhejiang Province (2016KF002). Qingdao National Laboratory for Marine Science  
58  
59  
60  
61  
62  
63  
64  
65

1 327 and Technology (2015ASKJ02, 2015ASKJ02-03-03), China Agriculture Research  
2 328 System (CARS-47), STS project (KFZD-SW-106, ZSSD-019).

3  
4 329

5  
6 330 **Author Contributions**

7  
8 331 YSX conceived the project. ZZX, DYM collected the samples and extracted the  
9 332 genomic DNA. YSX, JL and JL performed the genome assembly and data analysis.

10 333 YSX, ZZX, JL, DYM and JL wrote the paper.

11 334

12 335

13 336 **Reference**

14  
15  
16  
17  
18  
19 337 1. Schembri, P.J. *et al.* Occurrence of barred kinfjewaw, *Oplegnathuf fasciatus* (Actinopterygii:  
20 338 Perciformes: Oplegnathidae), in Malta (Central Mediterranean) with a discussion on possible  
21 339 modes of entry. *Acta Ichthyol Piscat* 40,101-104 (2010).

22  
23  
24  
25  
26  
27 340 2. Mundy, B.C. Checklist of the fishes of the Hawaiian Archipelago. *Bishop Mus Bull Zool* 6,  
28 341 1-704 (2005).

29  
30  
31  
32 342 3. An, H.S. & Hong, S.W. Genetic diversity of rock bream *Oplegnathus fasciatus* in Southern  
33 343 Korea. *Genes Genom* 30, 451-459 (2008).

34  
35  
36  
37 344 4. Xiao, Y.S. *et al.* Pronounced population genetic differentiation in the rock bream  
38 345 *Oplegnathus fasciatus* inferred from mitochondrial DNA sequences. *Mitochondrial DNA A*  
39 346 27, 2045-2052 (2016).

40  
41  
42  
43  
44 347 5. Park, H.S. *et al.* Population Genetic Structure of Rock Bream (*Oplegnathus fasciatus*  
45 348 Temminck & Schlegel, 1884) Revealed by mtDNA COI Sequence in Korea and China.  
46 349 *Ocean Sci J* 53, 261-274 (2018).

47  
48  
49  
50  
51 350 6. Xu, D.D. *et al.* Chromosomal mapping of microsatellite repeats in the rock bream fish  
52 351 *Oplegnathus fasciatus*, with emphasis of their distribution in the neo-Y chromosome. *Mol*  
53 352 *Cytogenet* 6, 12 (2013).

54  
55  
56  
57  
58 353 7. Xue, R. *et al.* Karyotype and Ag-Nors In Male And Female Of *Oplegnathus Punctatus*.

1  
2  
3  
4  
5  
6  
7  
8  
9  
10  
11  
12  
13  
14  
15  
16  
17  
18  
19  
20  
21  
22  
23  
24  
25  
26  
27  
28  
29  
30  
31  
32  
33  
34  
35  
36  
37  
38  
39  
40  
41  
42  
43  
44  
45  
46  
47  
48  
49  
50  
51  
52  
53  
54  
55  
56  
57  
58  
59  
60  
61  
62  
63  
64  
65



- 1 354 *Oceanol Limnol Sin* 47, 626-632 (2016).
- 2 355 8. Xiao, Z.Z. Study on population genetics and culture biology of *Oplegnathus fasciatus*.
- 3 356 Doctor thesis p 162-176 (2015).
- 4 357 9. Zhang, B.C. *et al.* Rock bream (*Oplegnathus fasciatus*) viperin is a virus-responsive protein
- 5 358 that modulates innate immunity and promotes resistance against megalocytivirus infection.
- 6 359 *Dev Comp Immunol* 45, 35-42 (2014).
- 7 360 10. L, H. *et al.* Characterization of an Iridovirus Detected in Rock Bream (*Oplegnathus*
- 8 361 *fasciatus* ;Temminck and Schlegel). *Chin J Virol* 27, 158-164 (2011).
- 9 362 11. Koren, S. *et al.* Canu: scalable and accurate long-read assembly via adaptive k-mer weighting
- 10 363 and repeat separation. *Genome Res* 27, 722 (2017).
- 11 364 12. Marçais, G. & Kingsford, C. A fast, lock-free approach for efficient parallel counting of
- 12 365 occurrences of k-mers. *Bioinformatics* 27, 764–70 (2011).
- 13 366 13. Kajitani, R. *et al.* Efficient de novo assembly of highly heterozygous genomes from
- 14 367 whole-genome shotgun short reads. *Genome Res* 24, 1384-1395 (2014).
- 15 368 14. Prysycz, L. P. & Gabaldón, T. Redundans: an assembly pipeline for highly heterozygous
- 16 369 genomes. *Nucleic Acids Res* 44, e113-e113 (2016).
- 17 370 15. Simão, F. A. *et al.* BUSCO: assessing genome assembly and annotation completeness with
- 18 371 single-copy orthologs. *Bioinformatics* 31, 3210 (2015).
- 19 372 16. Li, H. & Durbin, R. Fast and accurate short read alignment with Burrows–Wheeler transform.
- 20 373 *Bioinformatics* 25, 1754-1760 (2009).
- 21 374 17. Benson, G. Tandem repeats finder: a program to analyze DNA sequences. *Nucleic Acids Res*
- 22 375 27, 573–80 (1999).
- 23 376 18. Tarailo-Graovac, M. & Chen, N. Using RepeatMasker to identify repetitive elements in
- 24 377 genomic sequences. In: Editorial board, Baxevanis Andreas D *et al.* (eds.), *Current Protocols*
- 25 378 *in Bioinformatics*, Chapter 4:Unit 4 10 (2009).
- 26 379 19. Jurka, J. *et al.* Repbase Update, a database of eukaryotic repetitive elements. *Cytogenetic*
- 27 380 *Genome Res* 110, 462–67 (2005).
- 28 381 20. Stanke, M. *et al.* AUGUSTUS: a web server for gene finding in eukaryotes. *Nucleic Acids*
- 29 382 *Res* 32(Web Server issue), W309-12 (2004).
- 30 383 21. Cai, Y. *et al.* Computational systems biology methods in molecular biology, chemistry
- 31
- 32
- 33
- 34
- 35
- 36
- 37
- 38
- 39
- 40
- 41
- 42
- 43
- 44
- 45
- 46
- 47
- 48
- 49
- 50
- 51
- 52
- 53
- 54
- 55
- 56
- 57
- 58
- 59
- 60
- 61
- 62
- 63
- 64
- 65

- 1 384 biology, molecular biomedicine, and biopharmacy. *BioMed Res Int* 2014, 746814 (2014).
- 2 385 22. Flicek, P. *et al.* Ensembl 2014. *Nucleic Acids Res* 42, D749-D755 (2014).
- 3
- 4 386 23. Gertz, E. M. *et al.* Composition-based statistics and translated nucleotide searches:
- 5
- 6 387 Improving the TBLASTN module of BLAST. *MBC Biology* 4, 41 (2006).
- 7
- 8 388 24. Birney, E. *et al.* GeneWise and Genomewise. *Genome Res* 14, 988-995 (2004).
- 9
- 10 389 25. Trapnell, C. *et al.* TopHat: discovering splice junctions with RNA-Seq. *Bioinformatics* 25,
- 11
- 12 390 105-1111 (2009).
- 13
- 14 391 26. Ghosh, S. & Chan, C. K. K. Analysis of RNA-Seq data using TopHat and Cufflinks. *Methods*
- 15
- 16 392 *Mole Biol* 1374, 339 (2016).
- 17
- 18 393 27. Campbell, M. S. *et al.* Genome Annotation and Curation Using MAKER and MAKER-P.
- 19
- 20 394 *Current Protocols in Bioinformatics* 48, 4.11.11 (2014).
- 21
- 22
- 23 395 28. Lobo, I. Basic Local Alignment Search Tool (BLAST). *J Mol Biol* 215, 403-410 (2008).
- 24
- 25 396 29. Harris, M. A. *et al.* The Gene Ontology (GO) database and informatics resource. *Nucleic*
- 26
- 27 397 *Acids Res* (2004).
- 28
- 29 398 30. Ogata, H. *et al.* KEGG: Kyoto Encyclopedia of Genes and Genomes. *Nucleic Acids Res* 27,
- 30
- 31 399 29-34 (2000).
- 32
- 33 400 31. Conesa, A. *et al.* Blast2GO: a universal tool for annotation, visualization and analysis in
- 34
- 35 401 functional genomics research. *Bioinformatics* 21, 3674 (2005).
- 36
- 37 402 32. Lowe, T. M. & Eddy, S. R. tRNAscan-SE: a program for improved detection of transfer RNA
- 38
- 39 403 genes in genomic sequence. *Nucleic Acids Res* 25, 955-964 (1997).
- 40
- 41 404 33. Griffiths-Jones, S. *et al.* Rfam: an RNA family database. *Nucleic Acids Res* 31, 439 (2003).
- 42
- 43 405 34. Lieberman-Aiden, E. *et al.* Comprehensive mapping of long-range interactions reveals
- 44
- 45 406 folding principles of the human genome. *Science* 326, 289-293 (2009).
- 46
- 47 407 35. Rao, S.S.P. *et al.* A 3D map of the human genome at kilobase resolution reveals principles of
- 48
- 49 408 chromatin looping. *Cell* 159, 1665-1680 (2014).
- 50
- 51 409 36. Sandborn, A.L. *et al.* Chromatin extrusion explains key features of loop and domain
- 52
- 53 410 formation in wild-type and engineered genomes. *Proc Natl Acad Sci USA* 112, E6456 (2015).
- 54
- 55 411 37. Flot, J.F. *et al.* Contact genomics: scaffolding and phasing (meta) genomes using
- 56
- 57 412 chromosome be 3D physical signatures. *FEBS Letters* 589, 2966-2974 (2015).
- 58
- 59 413 38. Burton, J.N. *et al.* Chromosome-scale scaffolding of de novo genome assemblies based on
- 60
- 61
- 62
- 63
- 64
- 65

1 414 chromatin interactions. *Nat Biotechnol* 31, 1119-1125 (2013).  
2  
3 415 39. Lobo, I. Basic Local Alignment Search Tool (BLAST). *J Mol Biol* 215, 403-410 (2008).  
4  
5 416 40. Thompson, J. D. *et al.* Multiple sequence alignment using ClustalW and ClustalX. *Curr*  
6  
7 417 *Protoc Bioinformatics* 2.3. 1-2.3. 22 (2002).  
8  
9 418 41. Guindon, S. *et al.* PhyML: Fast and Accurate Phylogeny Reconstruction by Maximum  
10  
11 419 Likelihood. *Infect Genet Evol* 9, 384-385 (2009).  
12  
13 420 42. Yang, Z. & Rannala, B. Bayesian estimation of species divergence times under a molecular  
14  
15 421 clock using multiple fossil calibrations with soft bounds. *Mol Biol Evol* 23, 212-226 (2006).  
16  
17 422 43. Hedges, S. B. *et al.* Tree of life reveals clock-like speciation and diversification. *Mol Biol*  
18  
19 423 *Evol* 32, 835-845 (2015).  
20  
21 424 44. Ricardo, B. R. *et al.* Phylogenetic classification of bony fishes. *BMC Evol Biol* 17, 162  
22  
23 425 (2017).  
24  
25 426

[Click here to view linked References](#)1  
2  
3  
4  
5  
6  
7  
8  
9  
10  
11  
12  
13  
14  
15  
16  
17  
18  
19  
20  
21  
22  
23  
24  
25  
26  
27  
28  
29  
30  
31  
32  
33  
34  
35  
36  
37  
38  
39  
40  
41  
42  
43  
44  
45  
46  
47  
48  
49  
50  
51  
52  
53  
54  
55  
56  
57  
58  
59  
60  
61  
62  
63  
64  
65

1 **Genome sequence of [the barred knifejaw](#), *Oplegnathus***  
2 ***fasciatus* (Temminck & Schlegel, 1884): the first**  
3 **[chromosome-level](#) draft genome in [the](#) family Oplegnathidae**

5 Yongshuang Xiao<sup>1,2,3\*</sup> †, Zhizhong Xiao<sup>1,2,3</sup> †, [Daoyuan Ma](#)<sup>1,2,3</sup>, Jing Liu<sup>2,3\*</sup>, Jun  
6 Li<sup>1,2,3\*</sup>

7 <sup>1</sup>CAS Key Laboratory of Experimental Marine Biology, Institute of Oceanology,  
8 Chinese Academy of Sciences, 7 Nanhai Road, Qingdao, 266071, China, <sup>2</sup>Laboratory  
9 for Marine Biology and Biotechnology, Qingdao National Laboratory for Marine  
10 Science and Technology, 7 Nanhai Road, Qingdao, 266071, China, <sup>3</sup>Center for Ocean  
11 Mega-Science, Chinese Academy of Sciences, 7 Nanhai Road, Qingdao, 266071,  
12 China\_

19 \*Correspondence address: Yongshuang Xiao, Mega-Science, Chinese Academy of  
20 Sciences, 7 Nanhai Road, Qingdao, 266071, China; Tel: +86-053282896729; E-mail:  
21 dahaishuang1982@163.com; Jing Liu, Institute of Oceanology, Chinese Academy of  
22 Sciences, 7 Nanhai Road, Qingdao, 266071, China; Tel: +86-053282898790; E-mail:  
23 jliu@qdio.ac.cn; Jun Li, Institute of Oceanology, Chinese Academy of Sciences, 7  
24 Nanhai Road, Qingdao, 266071, China; Tel: +86-053282898718; E-mail:  
25 junli@qdio.ac.cn.

26 †Contributed equally to this work.

删除的内容: rock bream

删除的内容: ,

1  
2  
3  
4  
5  
6  
7  
8  
9  
10  
11  
12  
13  
14  
15  
16  
17  
18  
19  
20  
21  
22  
23  
24  
25  
26  
27  
28  
29  
30  
31  
32  
33  
34  
35  
36  
37  
38  
39  
40  
41  
42  
43  
44  
45  
46  
47  
48  
49  
50  
51  
52  
53  
54  
55  
56  
57  
58  
59  
60  
61  
62  
63  
64  
65

31 **Abstract**

32 **Background**

33 The **barred knifejaw** (*Oplegnathus fasciatus*), a member of the Oplegnathidae family  
34 of the **Centrarchiformes**, is a **commercially** important rocky reef fish native to East  
35 Asia. *O. fasciatus* has become an important fishery resource for offshore cage  
36 aquaculture and fish stocking of marine ranching in China, Japan and Korea. Recently,  
37 **sexual dimorphism in growth** with neo-sex chromosome and widespread biotic  
38 diseases in *O. fasciatus* has **been** received increasing concern. However, **adequate**  
39 genome resources **for gaining** insight into sex-determining mechanisms and  
40 **establishing** genetically resistant breeding systems for *O. fasciatus* **are** lacking. Here,  
41 we **analysed the entire** genome of **a female** *O. fasciatus* **fish** using long-read  
42 sequencing and Hi-C data to generate chromosome-length scaffolds **and a highly**  
43 contiguous genome assembly.

44 **Findings**

45 We assembled the *O. fasciatus* **genome** with a total of 245.0 Gb of raw reads **that** were  
46 generated using both of PacBio Sequel and Illumina **HiSeq** 2000 platforms. The final  
47 draft genome assembly was approximately 778.7 Mb, which reached a **high** level of  
48 continuity with **a** contig N50 of 2.1 Mb. The genome size was consistent with the  
49 estimated genome size (**777.5** Mb) based on *k*-mer analysis. **We combined Hi-C data**  
50 **with a draft genome assembly to generate chromosome-length scaffolds. Twenty-four**  
51 **scaffolds corresponding to the twenty-four chromosomes were assembled to a final**  
52 **size of 768.8 Mb with a contig N50 of 2.1 Mb and a scaffold N50 of 33.5 Mb using**  
53 **1,372 contigs.** The identified repeat sequences accounted for **33.9%** of the **entire**  
54 genome, and **24,003** protein-coding genes with an average of 10.1 exons per gene  
55 were annotated using *de novo* methods, with RNA-seq data and homologies to other  
56 teleosts. **According to phylogenetic analysis using protein-coding genes, *O. fasciatus***  
57 **is closely** related to *Larimichthys crocea*, **with *O. fasciatus* diverging** from their  
58 **common** ancestor **approximately 70.5-88.5** million years ago.

59 **Conclusions**

60 We generated **a** high-quality draft genome, **with** chromosome assembly for *O.*

删除的内容: .

删除的内容: rock bream

删除的内容: Perciformes... is a commercially

删除的内容: growth of ...exual dimorphism in growth with

删除的内容: to

删除的内容: basing

删除的内容: based

删除的内容: have been...re lacking. Here, we performed

删除的内容: fish for .... *fasciatus* fish using long-read

删除的内容: , which

删除的内容: HiSeq

删除的内容: remarkable ...igh level of continuity with a

删除的内容: 32.2

删除的内容: whole ...ntire genome, and 24 ...4,003

删除的内容: the ...hylogenetic analysis using protein-coding

带格式的: 非突出显示

删除的内容: 87

带格式的: 非突出显示

删除的内容: 3

删除的内容: and...with chromosomes

1  
2  
3  
4  
5  
6  
7  
8  
9  
10  
11  
12  
13  
14  
15  
16  
17  
18  
19  
20  
21  
22  
23  
24  
25  
26  
27  
28  
29  
30  
31  
32  
33  
34  
35  
36  
37  
38  
39  
40  
41  
42  
43  
44  
45  
46  
47  
48  
49  
50  
51  
52  
53  
54  
55  
56  
57  
58  
59  
60  
61  
62  
63  
64  
65

118 *fasciatus* using long reads generated using PacBio sequencing technologies, which  
119 represents the first chromosome-level reference genome for Oplegnathidae species.  
120 Assembly of this genome, will provide insight into sex-determining mechanisms and  
121 serve as a resource for accelerating genome-assisted improvements in resistant  
122 breeding systems.

123 *Keywords:* *Oplegnathus fasciatus*; chromosome-level genome assembly; Hi-C  
124 assembly; sex-determining mechanism

## 125 Data description

### 126 Introduction of *O. fasciatus*

127 The Oplegnathidae family belongs to the order Centrarchiformes, including only one  
128 genus *Oplegnathus*, which is comprised of seven species (*O. conwayi*, *O. fasciatus*, *O.*  
129 *insignis*, *O. peaolopesi*, *O. punctatus*, *O. robinsoni*, *O. woodwardi*), two of which (*O.*  
130 *fasciatus* and *O. punctatus*) are commercially valuable in East Asia. The barred  
131 knifejaw, *O. fasciatus* (Temminck & Schlegel, 1844), is one of these two species in the  
132 *Oplegnathus*, which is commonly found at the depth of one to ten metres in  
133 association with rocky reefs<sup>1,2</sup>, and distributed across a wide range of shallow waters  
134 around Korea, Japan, China and Hawaii<sup>1,3,4</sup> (Fig. 1). *O. fasciatus* has become an  
135 important fishery resource for offshore cage aquaculture and fish stocking of marine  
136 ranching in China, Japan and Korea<sup>5</sup>. It has been reported that the male of  
137 *Oplegnathus* possesses a neo-sex chromosome, possibly a sex chromosome Y. The  
138 sex chromosome system for *Oplegnathus* is considered to be X<sub>1</sub>X<sub>1</sub>X<sub>2</sub>X<sub>2</sub>/X<sub>1</sub>X<sub>2</sub>Y  
139 based on karyotype analyses<sup>6,7</sup>. Furthermore, sexual dimorphism in growth has been  
140 detected in the *O. fasciatus*, with male fish exhibiting faster growth than females,  
141 possibly, be due to the sex chromosome system in *Oplegnathus*<sup>8</sup>. *O. fasciatus* is  
142 vulnerable to viruses (e.g., Iridovirus) and genetic degradation caused by inbreeding  
143 has led to higher susceptibility to diseases<sup>9,10</sup>. It is vital to develop genomic resources  
144 to gain insight into sex-determining mechanisms and to accelerate the  
145 genome-assisted improvements in resistant breeding systems.

146 So far, a genome sequence, with the chromosomal assembly of *O. fasciatus* has

删除的内容: is

删除的内容: The genome assembly

删除的内容: the ...enome-assisted improvements of

删除的内容: The family Oplegnathidae belongs...to the order

删除的内容: two

已下移 [2]: (*O. fasciatus* and *O. punctatus*)

已移动(插入) [2]

删除的内容:

删除的内容: that ...re of

删除的内容: values ...aluable in East Asia

删除的内容: rock bream

删除的内容: ...*O. fasciatus* (Temminck & Schlegel,

删除的内容: has ...ossesses a neo-sex chromosome, possibly

删除的内容: was ...s considered to be X<sub>1</sub>X<sub>1</sub>X<sub>2</sub>X<sub>2</sub>/X<sub>1</sub>X<sub>2</sub>Y

删除的内容: the growth

删除的内容: was ...as been detected in the *O. fasciatus*

删除的内容: the ... genome sequence and ...with the

删除的内容: have

1  
2  
3  
4  
5  
6  
7  
8  
9  
10  
11  
12  
13  
14  
15  
16  
17  
18  
19  
20  
21  
22  
23  
24  
25  
26  
27  
28  
29  
30  
31  
32  
33  
34  
35  
36  
37  
38  
39  
40  
41  
42  
43  
44  
45  
46  
47  
48  
49  
50  
51  
52  
53  
54  
55  
56  
57  
58  
59  
60  
61  
62  
63  
64  
65

203 not been reported. Here, we constructed a high-quality chromosome-level reference  
204 genome assembly for *O. fasciatus* using long reads by using the PacBio DNA  
205 sequencing platform, and used a genome assembly strategy by taking advantage of  
206 genome assembly program Canu<sup>11</sup>. This genome assembly of *O. fasciatus* is the first  
207 chromosome-level reference genome constructed for the Oplegnathidae family. The  
208 completeness and continuity of the genome will provide high quality genomic  
209 resources for studies on sex-determining mechanisms and for accelerating the  
210 genome-assisted improvements in resistant breeding systems.

211

212 **Genomic DNA extraction, genome size estimation**

213 High-quality genomic DNA for sequencing using the Illumina platform (Illumina Inc.,  
214 San Diego, CA, USA) and PacBio Sequel sequencing (Pacific Biosciences of  
215 California, Menlo Park, CA, USA) was extracted from fresh muscle tissue and blood  
216 samples from a single female *O. fasciatus*. The fish was collected from the near-shore  
217 area of Qingdao city (Yellow Sea), Shandong province. The whole-genome size of *O.*  
218 *fasciatus* was estimated based on Illumina DNA sequencing technology. A short-insert  
219 library (300~350 bp) was constructed and generated a total of ~90.7 Gb of raw reads  
220 using the standard protocol provided by the Illumina HiSeq X Ten platform (Illumina  
221 Inc., San Diego, CA, USA). After the removal of low-quality and redundant reads, we  
222 obtained approximately ~80.8 Gb of clean data for *de novo* assembly to estimate the  
223 whole-genome size (S Table 1, Fig. 2). All cleaned reads were subjected to 17-mer  
224 frequency distribution analysis<sup>12</sup>. As the total number of *k*-mers was approximately,  
225  $8.09 \times 10^{10}$  and the peak of *k*-mers was at a depth of 100, the genome size of *O.*  
226 *fasciatus* was calculated to be 777.5 Mb using the following formula with amendment:  
227 genome size = *k*-mer number / peak depth (Fig. 2). Meanwhile, an estimated  
228 heterozygosity of 0.29% and a repeat content of 38.46% were detected for *O.*  
229 *fasciatus* in this work. A pilot genome assembly was approximately 744.5 Mb with a  
230 contig N50 of 7.2 kb and a scaffold N50 of 84.1kb using the Illumina data and the  
231 assembly program Platanus package<sup>13</sup> (S Table 2). The GC content was 41% (S Fig.  
232 1). This genome assembly was of low-quality, partly due to its high genomic repeat

- 删除的内容: performed
- 删除的内容: constructed
- 删除的内容: ,
- 删除的内容: using
- 删除的内容: assembler
- 删除的内容: The
- 删除的内容: Oplegnathidae
- 删除的内容: of
- 删除的内容: and Hi-C library construction
- 删除的内容: of
- 带格式的: 字体: 倾斜
- 删除的内容: A whole-genome using Illumina DNA sequencing technology was applied to estimate *O. fasciatus* genome size
- 删除的内容: about
- 删除的内容: the
- 删除的内容: about
- 删除的内容: 808.9
- 删除的内容: the
- 删除的内容: 808.9
- 删除的内容: 777.5
- 删除的内容: s

1  
2  
3  
4  
5  
6  
7  
8  
9  
10  
11  
12  
13  
14  
15  
16  
17  
18  
19  
20  
21  
22  
23  
24  
25  
26  
27  
28  
29  
30  
31  
32  
33  
34  
35  
36  
37  
38  
39  
40  
41  
42  
43  
44  
45  
46  
47  
48  
49  
50  
51  
52  
53  
54  
55  
56  
57  
58  
59  
60  
61  
62  
63  
64  
65

254 content.

255

### 256 **Genome assembly using PacBio long reads**

257 Two 20 kb genomic DNA libraries were constructed and sequenced using [the](#) PacBio  
258 Sequel platform, generating 62.9 Gb raw DNA reads. We [obtained](#) 4.8 million  
259 subreads ([62.8 Gb in total](#)) with [an N50 read](#) length of ~22 kb after removing adaptor  
260 (S Table 1).

261 [Canu v1.4](#) was firstly used to assemble the genome with the  
262 Corrected-Error-Rate parameter set at 0.040<sup>11</sup>. As a result, a [genome assembly with a](#)  
263 total length of 875.9 Mb [was constructed](#) for *O. fasciatus*, [slightly higher than, the](#)  
264 [genome size](#) estimated [by](#) 17-mer analysis based on the Illumina data (S Table 2). [We](#)  
265 [attributed the relatively large genome size of the assembly to the complexity of this](#)  
266 [genome to factors such as heterozygosity](#). We [therefore](#) applied Redundans v0.13c<sup>14</sup>  
267 to remove the sequence redundancy [to obtain a](#) genome assembly size of 778.0 Mb.  
268 We then used [the Arrow tool in SMRT Link 5.0 software](#) with the minCoverage  
269 parameter set at 15 to implement [error correction based on the PacBio long reads data](#)  
270 (Table 1). The resulting genome assembly was further polished using [Illumina NGS](#)  
271 data, which were used in the genome survey analysis above. The final draft genome  
272 assembly was 778.7 Mb, which reached a [high level of continuity with a](#) contig N50  
273 length of 2.1 Mb (Table 1). The contig N50 of *O. fasciatus* was much higher than  
274 those of previous fish genome assemblies constructed using NGS DNA sequencing  
275 technologies [and is comparable to those of recently reported model fish species \(S](#)  
276 [table 3\)](#). [Previous studies illuminated the relationship between read length and](#)  
277 [genome assembly; therefore, we attributed the continuity of the genome primarily to](#)  
278 [the application of long reads in the assembly.](#)

### 279 **Hi-C library construction and chromosome assembly**

280 [Hi-C is a sequencing-based approach for determining chromosome interactions by](#)  
281 [calculating the contact frequency between pairs of loci, which are strongly dependent](#)  
282 [upon the one-dimensional distance, in base pairs, between a pair of loci<sup>15, 16</sup>](#). In this  
283 [work, we used Hi-C to construct the genome assembly of \*O. fasciatus\*.](#)

- 删除的内容: The genomic DNA for Hi-C library was extracted from the whole-blood cell of *O. fasciatus* as described<sup>14</sup>. The cells were fixed with formaldehyde and lysed, and the cross-linked DNA digested with MboI. Sticky ends were biotin-labeled and proximity ligated to form chimeric junctions that were enriched for and then physically sheared to a size of 300–500 bp<sup>14</sup>. Chimeric fragments representing the original cross-linked long-distance physical interactions were then processed into paired-end sequencing libraries, and 629 million 150-bp paired-end Illumina reads (91.5 Gb) with Q20 and Q30 of ~94.0% were produced (S Table 1, S Table 3). As a result, the paired data, data with mate mapped to a different contig (or scaffold) and data with mapped to a different contig (or scaffold) (map Q5 ≥ 5) were 593.7 Mb (94.4%), 240.5 Mb (40.5%) and 205.1 Mb (34.6%), respectively (S Table 3). .
- 带格式的: 字体颜色: 红色
- 带格式的: 字体颜色: 红色
- 带格式的: 字体颜色: 红色
- 带格式的: 字体颜色: 红色
- 删除的内容: totally 62.8 Gb
- 删除的内容: a read N50
- 删除的内容: The
- 删除的内容: genome assembly
- 删除的内容: achieved
- 删除的内容: which was
- 删除的内容: consistent with
- 删除的内容: genome size in
- 删除的内容: <sup>15</sup>
- 删除的内容: and
- 删除的内容: the Arrow of Smrtlink 5.0
- 删除的内容: the
- 删除的内容: remarkable
- 删除的内容: with
- 删除的内容: ,
- 删除的内容: with
- 删除的内容: S Table 4



1  
2  
3  
4  
5  
6  
7  
8  
9  
10  
11  
12  
13  
14  
15  
16  
17  
18  
19  
20  
21  
22  
23  
24  
25  
26  
27  
28  
29  
30  
31  
32  
33  
34  
35  
36  
37  
38  
39  
40  
41  
42  
43  
44  
45  
46  
47  
48  
49  
50  
51  
52  
53  
54  
55  
56  
57  
58  
59  
60  
61  
62  
63  
64  
65

317 Genomic DNA was extracted for the Hi-C library from a whole-blood sample of  
318 *O. fasciatus* as described<sup>17</sup>. Cells were fixed with formaldehyde and lysed, and the  
319 cross-linked DNA was digested with MboI. Sticky ends were biotin-labelled and  
320 proximity ligated to form chimeric junctions and then physically sheared to a size of  
321 300–500 bp<sup>17</sup>. Chimeric fragments representing the original cross-linked,  
322 long-distance physical interactions were then processed into paired-end sequencing  
323 libraries, and 629 million 150-bp paired-end Illumina reads (91.5 Gb) were produced  
324 with Q20 and Q30 of ~94.0% (S Table 1, S Table 4). By mapping the Hi-C data to the  
325 PacBio-based assembly using BWA software, we found that sequencing data with  
326 mates mapped to a different contig (or scaffold) and data mapped to a different contig  
327 (or scaffold) (map Q5 ≥ 5) were 593.7 Mb (94.4%), 240.5 Mb (40.5%) and 205.1  
328 Mb (34.6%), respectively (S Table 4). We then further employed BWA and Lachesis  
329 software to align paired-end reads to filter all base sequences more than 500bp from  
330 each restriction site<sup>18</sup>. According to the conduct of clustering, ordering, and orienting  
331 to the assembly contigs (1 692), these sequences were grouped into 24 chromosome  
332 clusters and scaffolded using Lachesis software with tuned parameters<sup>19</sup> (Table 2, Fig.  
333 3). Finally, we constructed the chromosome interactions map using Juicer software  
334 and employed the JucieBox to complete the visual correction of the interaction map.  
335 We obtained 1 756 polished contigs by interrupting misassembly from 1 692 contigs.  
336 Twenty-four scaffolds were assembled corresponding to the 24 chromosomes of *O.*  
337 *fasciatus* based on the karyotype analyses<sup>6,7</sup> (Table 2, Fig. 3).

338 A final size of 768.8 Mb accounting for the 98.7% draft genome was assembled,  
339 which showed a high level of continuity with a contig N50 of 2.1 Mb and a scaffold  
340 N50 of 33.5 Mb using 1372 contigs. The anchor rate of contigs (> 100 kb) to  
341 chromosomes was attained up to the 99.7% based on the Hi-C assembly (Table 4).  
342 The contig N50 and scaffold N50 of *O. fasciatus* were much higher than those of  
343 previous fish genome assemblies constructed using NGS DNA sequencing  
344 technologies based on the genome assembly using PacBio long reads and Hi-C  
345 assembly (S table 3).

346

带格式的: 非突出显示

带格式的: 非突出显示

1  
2  
3  
4  
5  
6  
7  
8  
9  
10  
11  
12  
13  
14  
15  
16  
17  
18  
19  
20  
21  
22  
23  
24  
25  
26  
27  
28  
29  
30  
31  
32  
33  
34  
35  
36  
37  
38  
39  
40  
41  
42  
43  
44  
45  
46  
47  
48  
49  
50  
51  
52  
53  
54  
55  
56  
57  
58  
59  
60  
61  
62  
63  
64  
65

## 347 **Genome quality evaluation**

348 To assess the completeness of the assembled *O. fasciatus* genome, we subjected the  
349 [assembled](#) sequences to BUSCO version 3 evaluation (BUSCO, actinopterygii\_odb9)  
350 [20](#). Overall, 96.6% and 1.5% of the 4 584 expected actinopterygii genes were  
351 identified in the assembled genome as complete and partial BUSCO profiles,  
352 respectively. Approximately 85 genes could be considered missing in our assembly ([S](#)  
353 [table 5](#)). Among the expected complete actinopterygii genes, 4 259 and 171 were  
354 identified as single copy and duplicated BUSCOs, respectively ([S table 5](#)). We then  
355 used [Minimap2](#) to estimate the completeness and homogeneity of genome assembly  
356 based on [CLR](#) (Continuous Long Reads) subreads. A high quality of completeness  
357 and homogeneity was [assessed in the](#) genome assembly, and the mapping rate,  
358 coverage rate and average sequencing depth [reached](#) [90.2%](#), [99.9%](#) and [80.6%](#),  
359 respectively ([S table 6](#)). [Note that the mapping ratio might be related to the repetitive](#)  
360 [content of the \*O. fasciatus\* genome, especially for the high repeat content in the sex](#)  
361 [chromosomes<sup>6</sup>](#). However, [how the repetitive elements in the genome influence the](#)  
362 [karyotypes of this species needs further investigation](#).

363 To further evaluate the accuracy of [the \*O. fasciatus\*](#) genome assembly, we  
364 aligned the NGS-based short reads from [the](#) whole-genome sequencing data against  
365 the reference genome using [BWA<sup>21</sup>](#). We then used [GATK](#) to implement [SNP calling](#)  
366 and filter work, [and the results](#) showed [that](#) [99.8%](#) and [0.2%](#) of the  $1.6 \times 10^6$  expected  
367 SNP reads were identified in the assembled genome as [heterozygous and homologous](#),  
368 SNPs, respectively. SNP calling on the final assembly also yielded a heterozygosity  
369 rate of 0.20%, supporting [the \*k\*-mer estimate analysis \(0.29%\)](#) ([S table 7](#)).

## 371 **Repeat sequences within the *O. fasciatus* genome assembly**

372 To identify tandem repeats, we utilized Tandem Repeat Finder to annotate repetitive  
373 elements in the *O. fasciatus* genome. RepeatModeler (version 1.04) and  
374 [LTR\\_FINDER<sup>22</sup>](#) were used to construct a *de novo* repeat library with default  
375 parameters. Subsequently, we used [RepeatMasker<sup>23</sup>](#) (version 3.2.9) to map our  
376 assembled sequences on the Repbase TE (version 14.04)[<sup>24</sup>](#) and the *de novo* repeat

删除的内容:<sup>16</sup>

删除的内容:

删除的内容: S Table 5

删除的内容: both of

删除的内容: S Table 5

删除的内容: the

删除的内容: the

删除的内容: checked for

删除的内容: were

删除的内容: to

删除的内容: S Table 6

带格式的: 上标

删除的内容: BWA<sup>17</sup>

删除的内容: the

删除的内容: the

删除的内容:

删除的内容: heterozygosity and homology

删除的内容: the estimate from *k*-mer

删除的内容: S Table 7

删除的内容:<sup>18</sup>

删除的内容: r

删除的内容: !

删除的内容:<sup>9</sup>

删除的内容:<sup>20</sup>

1  
2  
3  
4  
5  
6  
7  
8  
9  
10  
11  
12  
13  
14  
15  
16  
17  
18  
19  
20  
21  
22  
23  
24  
25  
26  
27  
28  
29  
30  
31  
32  
33  
34  
35  
36  
37  
38  
39  
40  
41  
42  
43  
44  
45  
46  
47  
48  
49  
50  
51  
52  
53  
54  
55  
56  
57  
58  
59  
60  
61  
62  
63  
64  
65

400 library to identify known and novel transposable elements (TEs). In addition,  
401 TE-related proteins were annotated by using RepeatProteinMask software (version  
402 3.2.2)<sup>23</sup>

403 **The identified repeat sequences accounted for 33.9% of the *O. fasciatus* genome**  
404 **including repeat sequences with 23.6% of the genome based on the *de novo* repeat**  
405 **library (Table 4). Approximately 23.4% of the *O. fasciatus* genome was identified as**  
406 interspersed repeats (most often TEs). Among them, DNA transposable elements were  
407 the most abundant type of repeat sequences, which occupied 11.5% of the whole  
408 genome. Long interspersed nuclear elements (LINEs) and long terminal repeats (LTRs)  
409 comprised 7.3% and 4.0% of the whole genome, respectively (Table 4, S Fig. 2).

### 410 RNA preparation and sequencing

411 We sequenced cDNA libraries prepared from the eggs of *O. fasciatus* that were used  
412 for genome annotation using Illumina sequencing technologies. RNA quality was  
413 determined based on the estimation of the ratio of absorbance at 260nm/280nm (OD =  
414 2.0) and the RIN (value = 9.2) by using a Nanodrop ND-1000 spectrophotometer  
415 (LabTech, USA) and a 2100 Bioanalyzer (Agilent Technologies, USA), respectively.  
416 We used the Clontech SMARTer cDNA synthesis kit to complete reverse transcription.  
417 A paired-end library was prepared following the Paired-End Sample Preparation Kit  
418 manual (Illumina Inc., San Diego, CA, USA). Finally, a library with an insert length  
419 of 300 bp was sequenced by Illumina HiSeq X Ten in 150PE mode (Illumina Inc., San  
420 Diego, CA, USA). As a result, we obtained ~42.2 Gb high-quality transcriptome data  
421 from RNA-seq (S Table 1, S table 8).

### 422 Gene annotation

423 Gene annotation of the *O. fasciatus* genome was performed using *de novo*,  
424 homology-based and transcriptome sequencing-based predictions. We employed  
425 Augustus (version 2.5.5)<sup>25</sup> and GenScan (version 1.0)<sup>26</sup> software to predict  
426 protein-coding genes in the *O. fasciatus* genome assembly. Protein sequences of  
427 closely related fish species including *Larimichthys crocea*, *Lates calcarifer*,  
428 *Gasterosteus aculeatus*, *Paralichthys olivaceus*, *Cynoglossus semilaevis* and *Gadus*  
429 *morhua* were downloaded from Ensembl<sup>27</sup> and aligned against the *O. fasciatus*

- 删除的内容: the
- 删除的内容: <sup>1</sup>
- 删除的内容: <sup>9</sup>
- 删除的内容: ed
- 删除的内容: The total identified
- 删除的内容: accounted for
- 删除的内容: *O. fasciatus*
- 删除的内容: 2
- 删除的内容: 1
- 删除的内容: The 1
- 删除的内容: took up
- 删除的内容: 2
- 删除的内容: High quality of RNA were detected
- 删除的内容:
- 删除的内容:
- 删除的内容: the process of
- 删除的内容: The
- 删除的内容: the manual of
- 删除的内容: the
- 删除的内容: S Table 8
- 删除的内容: <sup>21</sup>
- 删除的内容: <sup>22</sup>
- 删除的内容: s
- 删除的内容: of
- 删除的内容: <sup>23</sup>
- 删除的内容: to

1  
2  
3  
4  
5  
6  
7  
8  
9  
10  
11  
12  
13  
14  
15  
16  
17  
18  
19  
20  
21  
22  
23  
24  
25  
26  
27  
28  
29  
30  
31  
32  
33  
34  
35  
36  
37  
38  
39  
40  
41  
42  
43  
44  
45  
46  
47  
48  
49  
50  
51  
52  
53  
54  
55  
56  
57  
58  
59  
60  
61  
62  
63  
64  
65

456 genome using TBLASTN software<sup>28</sup>. Subsequently, Genewise2.2.0 software<sup>29</sup> was  
457 employed to predict potential gene structures on all alignments.

458 We also mapped these NGS transcriptome short reads onto our genome assembly  
459 using TopHat1.2 software<sup>30</sup>, and we then employed Cufflinks<sup>31</sup> to predict gene  
460 structures (S table 9). All gene models were then integrated using MAKER to obtain a  
461 consensus gene set<sup>32</sup>. The final total gene set was composed of 24 003 genes with an  
462 average of 10.1 exons per gene in the *O. fasciatus* genome (Table 1). The gene  
463 number, gene length distribution, CDS length distribution, exon length distribution  
464 and intron length distribution were all comparable with those of other teleost fish  
465 species (S table 9, S Fig. 3).

466 To obtain further functional annotation of the protein-coding genes in the *O.*  
467 *fasciatus* genome, we employed the local BLASTX and BLASTN programs and the  
468 Swiss-prot database with an e-value  $\leq 1e-5$ <sup>33</sup> to align the non-redundant nucleotide  
469 (NT) and non-redundant protein (NR), respectively. We also used Blast2GO software  
470 to search the Gene ontology (GO), and Kyoto Encyclopaedia of Genes and Genomes  
471 (KEGG) pathway databases<sup>34, 35, 36</sup>. Ultimately, 97.3% (23 364 genes) of the 24 003  
472 genes were annotated by at least one database (S Table 10). Four types of non-coding  
473 RNAs (microRNAs, transfer RNAs, ribosomal RNAs, and small nuclear RNAs) were  
474 also annotated using the tRNAscan-SE and the Rfam database in this study<sup>37, 38</sup> (S  
475 Table 11).

#### 476 **Gene family identification and phylogenetic tree construction**

477 We employed the BLASTP program<sup>39</sup> with an e-value threshold of 1e-5 to identify  
478 gene families based on the transcript alignments of each gene from *O. fasciatus* and  
479 other fish species, which included *Larimichthys crocea*, *Gadus morhua*, *Paralichthys*  
480 *olivaceus*, *Cynoglossus semilaevis*, *Notothenia coriiceps*, *Boleophthalmus*  
481 *pectinirostris*, *Lepisosteus oculatus*, *Gasterosteus aculeatus*, *Callorhynchus milii*,  
482 *Danio rerio*, *Salmo salar* and *Oryzias latipes*. 21,528 gene families were identified by  
483 clustering the homologous gene sequences based on H-scores calculated from  
484 Bit-score using Hcluster\_sg software (S Fig. 4). Subsequently, we selected 1,236  
485 single-copy orthogroups from the above-mentioned species to construct the

删除的内容: 24...8. Subsequently, Genewise2.2.0 software<sup>25...9</sup>

删除的内容: 26...0, and we then we ...employed Cufflinks<sup>27...1</sup>

删除的内容: in...of other teleost fish species (S Table 9

删除的内容: In order t...o o...btain further

删除的内容: Hi-C assembly and chromosome interactions

Hi-C was a sequencing-based approach for determining chromosome interactions by calculating the contact frequency between pairs of loci, which depended strongly on the one-dimensional distance, in base pairs, between a pair of loci<sup>35, 36</sup>. We employed BWA and Lachesis softwares to align paired-end reads to the draft genome assembly and filtered all base sequences other than 500bp from each restriction site<sup>37</sup>. According to the conduct of clustering, ordering, and orienting to the assembly contigs (1 692), those were grouped into 24 chromosome clusters and scaffolded using Lachesis software with tuned parameters<sup>38</sup> (Table 3, Fig. 3). Finally, we constructed the chromosome interactions map using Juicer software and employed the JucieBox to complete the visual correction of interactions map. We obtained polished 1 756 contigs by interrupting misassembly from the 1 692 contigs. Twenty-four scaffolds corresponding to the 24 chromosomes of *O. fasciatus* based on the karyotype analyses were assembled<sup>6, 7</sup> (Table 3, Fig. 3). A final size of 768.8 Mb accounting for the 98.7% draft genome was assembled, which remarkable high level of continuity with contig N50 of 2.1 Mb and scaffold N50 of 33.5 Mb using 1372 contigs. The anchor rate of contigs (> 100 kb) to chromosomes was reached up to the 99.7% based on the Hi-C assembly (Table 4). The contig N50 and scaffold N50 of *O. fasciatus* were much higher than those of previous fish genome assemblies constructed using NGS DNA sequencing technologies based on the genome assembly using PacBio long reads and Hi-C assembly (S Table 4).

删除的内容: family...based on the transcripts...alignments

带格式的

删除的内容: 23273

删除的内容: 23,270

删除的内容: of ...he homologous gene sequences based on

1  
2  
3  
4  
5  
6  
7  
8  
9  
10  
11  
12  
13  
14  
15  
16  
17  
18  
19  
20  
21  
22  
23  
24  
25  
26  
27  
28  
29  
30  
31  
32  
33  
34  
35  
36  
37  
38  
39  
40  
41  
42  
43  
44  
45  
46  
47  
48  
49  
50  
51  
52  
53  
54  
55  
56  
57  
58  
59  
60  
61  
62  
63  
64  
65

587 phylogenetic relationships between *O. fasciatus* and other fish species. We used the  
588 ClustalW program<sup>40</sup> to extract and align coding sequences of single-copy genes from  
589 the 1,158 orthogroups with a length filter (S Fig. 5). All the alignments were  
590 concatenated as a single data set for each species. Nondegenerated sites extracted  
591 from the data set were then joined into new sequences for each species to construct a  
592 phylogenetic tree based on the maximum-likelihood method implemented in the  
593 PhyML package<sup>41</sup> (with the -m PROTGAMMAAUTO model). We used the  
594 MCMCTree program to estimate divergence times among species based on the  
595 approximate likelihood method<sup>42</sup> and molecular clock data from the divergence time  
596 between medaka from the TimeTree database<sup>43</sup>. According to the phylogenetic  
597 analysis *O. fasciatus* (Eupercaria: Centrarchiformes) clustered with *Larimichthys*  
598 *crocea* in the order Perciformes (Eupercaria), which was consistent with the new fish  
599 species taxonomy<sup>44</sup> (Fig. 4). The divergence time between *O. fasciatus* and the  
600 common ancestor with *Larimichthys crocea* was approximately 70.5-88.5 Ma.

### 601 **Conclusions**

602 We successfully assembled the genome of *O. fasciatus* and reported the first  
603 chromosome-level genome sequencing, assembly and annotation based on long reads  
604 from the third-generation PacBio Sequel sequencing platform. The final draft genome  
605 assembly is approximately 778.7 Mb, which was slightly higher than the estimated  
606 genome size (777.5 Mb) based on *k*-mer analysis. Those contigs were scaffolded to  
607 chromosomes using Hi-C data, resulting a genome with a high level of continuity with  
608 a contig N50 of 2.1 Mb and a scaffold N50 of 33.5 Mb. The chromosome-level  
609 genome assembly of *O. fasciatus* was the first high-quality genome in the  
610 Oplegnathidae family. We also predicated 24,003 protein-coding genes from the  
611 generated assembly, and 97.3% (23,364 genes) of all protein-coding genes were  
612 annotated. We found that the divergence time between *O. fasciatus* and its the  
613 common ancestor with *Larimichthys crocea* was approximately 70.5-88.5 Ma. As far  
614 as we known, the Y chromosomes has always exhibited many specific sequence  
615 characteristics compared to X1 and X2, such as repeat content, and those differences  
616 might increase the difficulty of the sequence assembly of chromosomes X1 and X2.

- 删除的内容: the
- 删除的内容:
- 删除的内容: 765
- 删除的内容: , respectively
- 删除的内容: of
- 删除的内容: a
- 删除的内容: were
- 删除的内容: together
- 删除的内容: belonged to
- 删除的内容: . The taxonomy of Notothenioidei should be elevated to the order level from the Perciformes and be paralleled with Gasterosteiformes
- 删除的内容: at about
- 删除的内容: 70.3-87.3
- 删除的内容: whole
- 删除的内容: accounting for 96.3% of the estimated genome size
- 删除的内容: 808.9
- 删除的内容: also
- 删除的内容: of all species
- 删除的内容: , which reached a remarkable high level of continuity with contig N50 of 2.1 Mb and scaffold N50 of 33.5 Mb
- 删除的内容: The contig N50 was remarkably longer than those of most fish genome assemblies, and was comparable with those of recently reported model fish species.
- 删除的内容: 24
- 删除的内容: Twenty-four scaffolds corresponding to the twenty-four chromosomes were firstly assembled to a final size of 768.8 Mb using 1372 contigs based on the Hi-C assembly.
- 删除的内容: the taxonomy of Notothenioidei should be elevated to the order level and
- 删除的内容: at about
- 删除的内容: 70.3-87.3

1  
2  
3  
4  
5  
6  
7  
8  
9  
10  
11  
12  
13  
14  
15  
16  
17  
18  
19  
20  
21  
22  
23  
24  
25  
26  
27  
28  
29  
30  
31  
32  
33  
34  
35  
36  
37  
38  
39  
40  
41  
42  
43  
44  
45  
46  
47  
48  
49  
50  
51  
52  
53  
54  
55  
56  
57  
58  
59  
60  
61  
62  
63  
64  
65

652 The chromosome-level genome assembly, together with gene annotation data  
653 generated for the female fish in this work will provide, a valuable resource for further  
654 research on sex-determining mechanisms, especially for obtaining an accurate  
655 assembly of the Y chromosome in male fish. These results will also accelerate  
656 genome-wide association studies in resistant breeding systems.

- 删除的内容: The
- 删除的内容: ,
- 删除的内容: ed
- 删除的内容: and
- 删除的内容: for
- 删除的内容: ing
- 删除的内容: the
- 删除的内容: on

657  
658 **Ethics Statement**

659 This research was approved by the Animal Care and Use committee of Chinese  
660 Academic Science. All participants consent the study under the 'Ethics, consent and  
661 permissions' heading. All participants consent to publish the work under the 'Consent  
662 to publish' heading.

663  
664 **Availability of supporting data**

665 Supporting data and materials are available in the GigaScience GigaDB database,  
666 with the raw sequences deposited in the SRA under the accession number  
667 SRP158313.

668  
669 **Competing interests**

670 The authors declare that they have no competing interests.

671  
672 **Funding**

673 This study was supported by a grant from the National Natural Science Foundation of  
674 China (No. 41506170, No. 31672672, and No. 31872195), Shandong Province Key  
675 Research and Invention Program (2017GHY15102, 2017GHY15106), Qingdao  
676 Source Innovation Program (17-1-1-57-jch), STS (2017, 2018), Marine Fishery  
677 Institute of Zhejiang Province, Key Laboratory of Mariculture and Enhancement of  
678 Zhejiang Province (2016KF002). Qingdao National Laboratory for Marine Science  
679 and Technology (2015ASKJ02, 2015ASKJ02-03-03), China Agriculture Research  
680 System (CARS-47), STS project (KFZD-SW-106, ZSSD-019).

681

1  
2  
3  
4  
5  
6  
7  
8  
9  
10  
11  
12  
13  
14  
15  
16  
17  
18  
19  
20  
21  
22  
23  
24  
25  
26  
27  
28  
29  
30  
31  
32  
33  
34  
35  
36  
37  
38  
39  
40  
41  
42  
43  
44  
45  
46  
47  
48  
49  
50  
51  
52  
53  
54  
55  
56  
57  
58  
59  
60  
61  
62  
63  
64  
65

690 **Author Contributions**

691 YSX conceived the project. ZZX, DYM collected the samples and extracted the  
692 genomic DNA. YSX, JL and JL performed the genome assembly and data analysis.  
693 YSX, ZZX, JL, DYM and JL wrote the paper.

694

695

696 **Reference**

697 1. Schembri, P.J. *et al.* Occurrence of barred kinfjew, *Oplegnathus fasciatus* (Actinopterygii:  
698 Perciformes: Oplegnathidae), in Malta (Central Mediterranean) with a discussion on possible  
699 modes of entry. *Acta Ichthyol Piscat* 40,101-104 (2010).

700 2. Mundy, B.C. Checklist of the fishes of the Hawaiian Archipelago. *Bishop Mus Bull Zool* 6,  
701 1-704 (2005).

702 3. An, H.S. & Hong, S.W. Genetic diversity of rock bream *Oplegnathus fasciatus* in Southern  
703 Korea. *Genes Genom* 30, 451-459 (2008).

704 4. Xiao, Y.S. *et al.* Pronounced population genetic differentiation in the rock bream  
705 *Oplegnathus fasciatus* inferred from mitochondrial DNA sequences. *Mitochondrial DNA A*  
706 27, 2045-2052 (2016).

707 5. Park, H.S. *et al.* Population Genetic Structure of Rock Bream (*Oplegnathus fasciatus*  
708 Temminck & Schlegel, 1884) Revealed by mtDNA COI Sequence in Korea and China.  
709 *Ocean Sci J* 53, 261-274 (2018).

710 6. Xu, D.D. *et al.* Chromosomal mapping of microsatellite repeats in the rock bream fish  
711 *Oplegnathus fasciatus*, with emphasis of their distribution in the neo-Y chromosome. *Mol*  
712 *Cytogenet* 6, 12 (2013).

713 7. Xue, R. *et al.* Karyotype and Ag-Nors In Male And Female Of *Oplegnathus Punctatus*.  
714 *Oceanol Limnol Sin* 47, 626-632 (2016).

715 8. Xiao, Z.Z. Study on population genetics and culture biology of *Oplegnathus fasciatus*.  
716 Doctor thesis p 162-176 (2015).

1  
2  
3  
4  
5  
6  
7  
8  
9  
10  
11  
12  
13  
14  
15  
16  
17  
18  
19  
20  
21  
22  
23  
24  
25  
26  
27  
28  
29  
30  
31  
32  
33  
34  
35  
36  
37  
38  
39  
40  
41  
42  
43  
44  
45  
46  
47  
48  
49  
50  
51  
52  
53  
54  
55  
56  
57  
58  
59  
60  
61  
62  
63  
64  
65

717 9. Zhang, B.C. *et al.* Rock bream (*Oplegnathus fasciatus*) viperin is a virus-responsive protein  
718 that modulates innate immunity and promotes resistance against megalocytivirus infection.  
719 *Dev Comp Immunol* 45, 35-42 (2014).

720 10. L, H. *et al.* Characterization of an Iridovirus Detected in Rock Bream (*Oplegnathus*  
721 *fasciatus* ;Temminck and Schlegel). *Chin J Virol* 27, 158-164 (2011).

722 11. Koren, S. *et al.* Canu: scalable and accurate long-read assembly via adaptive k-mer weighting  
723 and repeat separation. *Genome Res* 27, 722 (2017).

724 12. Marcais, G. & Kingsford, C. A fast, lock-free approach for efficient parallel counting of  
725 occurrences of k-mers. *Bioinformatics* 27, 764–70 (2011).

726 13. Kajitani, R. *et al.* Efficient de novo assembly of highly heterozygous genomes from  
727 whole-genome shotgun short reads. *Genome Res* 24, 1384-1395 (2014).

728 14. 

729 15. Prysycz, L. P. & Gabaldón, T. Redundans: an assembly pipeline for highly heterozygous  
730 genomes. *Nucleic Acids Res* 44, e113-e113 (2016).

731 16. Simão, F. A. *et al.* BUSCO: assessing genome assembly and annotation completeness with  
732 single-copy orthologs. *Bioinformatics* 31, 3210 (2015).

733 17. Li, H. & Durbin, R. Fast and accurate short read alignment with Burrows–Wheeler transform.  
734 *Bioinformatics* 25, 1754-1760 (2009).

735 18. Benson, G. Tandem repeats finder: a program to analyze DNA sequences. *Nucleic Acids Res*  
736 27, 573–80 (1999).

737 19. Tarailo-Graovac, M. & Chen, N. Using RepeatMasker to identify repetitive elements in  
738 genomic sequences. In: Editorial board, Baxevanis Andreas D *et al.* (eds.), *Current Protocols*  
739 *in Bioinformatics*, Chapter 4:Unit 4 10 (2009).

740 20. Jurka, J. *et al.* Repbase Update, a database of eukaryotic repetitive elements. *Cytogenetic*  
741 *Genome Res* 110, 462–67 (2005).

742 21. Stanke, M. *et al.* AUGUSTUS: a web server for gene finding in eukaryotes. *Nucleic Acids*  
743 *Res* 32(Web Server issue), W309-12 (2004).

744 22. Cai, Y. *et al.* Computational systems biology methods in molecular biology, chemistry  
745 biology, molecular biomedicine, and biopharmacy. *BioMed Res Int* 2014, 746814 (2014).

746 23. Flicek, P. *et al.* Ensembl 2014. *Nucleic Acids Res* 42, D749-D755 (2014).

已下移 [1]: Sandborn, A.L. *et al.* Chromatin extrusion explains key features of loop and domain formation in wild-type and engineered genomes. *Proc Natl Acad Sci USA* 112, E6456 (2015). .



1  
2  
3  
4  
5  
6  
7 751 24. Gertz, E. M. *et al.* Composition-based statistics and translated nucleotide searches:  
8 752 Improving the TBLASTN module of BLAST. *MBC Biology* 4, 41 (2006).  
9  
10 753 25. Birney, E. *et al.* GeneWise and Genomewise. *Genome Res* 14, 988-995 (2004).  
11  
12 754 26. Trapnell, C. *et al.* TopHat: discovering splice junctions with RNA-Seq. *Bioinformatics* 25,  
13 755 105-1111 (2009).  
14  
15 756 27. Ghosh, S. & Chan, C. K. K. Analysis of RNA-Seq data using TopHat and Cufflinks. *Methods*  
16 757 *Mole Biol* 1374, 339 (2016).  
17  
18 758 28. Campbell, M. S. *et al.* Genome Annotation and Curation Using MAKER and MAKER-P.  
19 759 *Current Protocols in Bioinformatics* 48, 4.11.11 (2014).  
20  
21 760 29. Lobo, I. Basic Local Alignment Search Tool (BLAST). *J Mol Biol* 215, 403-410 (2008).  
22  
23 761 30. Harris, M. A. *et al.* The Gene Ontology (GO) database and informatics resource. *Nucleic*  
24 762 *Acids Res* (2004).  
25  
26 763 31. Ogata, H. *et al.* KEGG: Kyoto Encyclopedia of Genes and Genomes. *Nucleic Acids Res* 27,  
27 764 29-34 (2000).  
28  
29 765 32. Conesa, A. *et al.* Blast2GO: a universal tool for annotation, visualization and analysis in  
30 766 functional genomics research. *Bioinformatics* 21, 3674 (2005).  
31  
32 767 33. Lowe, T. M. & Eddy, S. R. tRNAscan-SE: a program for improved detection of transfer RNA  
33 768 genes in genomic sequence. *Nucleic Acids Res* 25, 955-964 (1997).  
34  
35 769 34. Griffithsjones, S. *et al.* Rfam: an RNA family database. *Nucleic Acids Res* 31, 439 (2003).  
36  
37 770 35. Lieberman-Aiden, E. *et al.* Comprehensive mapping of long-range interactions reveals  
38 771 folding principles of the human genome. *Science* 326, 289-293 (2009).  
39  
40 772 36. Rao, S.S.P. *et al.* A 3D map of the human genome at kilobase resolution reveals principles of  
41 773 chromatin looping. *Cell* 159, 1665-1680 (2014).  
42  
43 774 37. [Sandborn, A.L. \*et al.\* Chromatin extrusion explains key features of loop and domain](#)  
44 775 [formation in wild-type and engineered genomes. \*Proc Natl Acad Sci USA\* 112, E6456 \(2015\).](#)  
45  
46  
47 776 38. Flot, J.F. *et al.* Contact genomics: scaffolding and phasing (meta) genomes using  
48 777 chromosome be 3D physical signatures. *FEBS Letters* 589, 2966-2974 (2015).  
49  
50 778 39. Burton, J.N. *et al.* Chromosome-scale scaffolding of de novo genome assemblies based on  
51 779 chromatin interactions. *Nat Biotechnol* 31, 1119-1125 (2013).  
52  
53 780 40. Lobo, I. Basic Local Alignment Search Tool (BLAST). *J Mol Biol* 215, 403-410 (2008).  
54  
55  
56  
57  
58  
59  
60  
61  
62  
63  
64  
65

已移动(插入) [1]

1  
2  
3  
4  
5  
6  
7  
8  
9  
10  
11  
12  
13  
14  
15  
16  
17  
18  
19  
20  
21  
22  
23  
24  
25  
26  
27  
28  
29  
30  
31  
32  
33  
34  
35  
36  
37  
38  
39  
40  
41  
42  
43  
44  
45  
46  
47  
48  
49  
50  
51  
52  
53  
54  
55  
56  
57  
58  
59  
60  
61  
62  
63  
64  
65

781 41. Thompson, J. D. *et al.* Multiple sequence alignment using ClustalW and ClustalX. *Curr*  
782 *Protoc Bioinformatics* 2.3. 1-2.3. 22 (2002).

783 42. Guindon, S. *et al.* PhyML: Fast and Accurate Phylogeny Reconstruction by Maximum  
784 Likelihood. *Infect Genet Evol* 9, 384-385 (2009).

785 43. Yang, Z. & Rannala, B. Bayesian estimation of species divergence times under a molecular  
786 clock using multiple fossil calibrations with soft bounds. *Mol Biol Evol* 23, 212-226 (2006).

787 [44.](#) Hedges, S. B. *et al.* Tree of life reveals clock-like speciation and diversification. *Mol Biol*  
788 *Evol* 32, 835-845 (2015).

789 45. [Ricardo, B. R. \*et al.\* Phylogenetic classification of bony fishes. \*BMC Evol Biol\* 17, 162](#)  
790 [\(2017\).](#)

791

带格式的: 字体: 倾斜

Table 1 Summary of *Oplegnathus fasciatus* genome assembly and annotation

| Genome assembly                      | values      |
|--------------------------------------|-------------|
| Contig N50 size (Mb)                 | 2.1         |
| Contig number                        | 1,692       |
| Scaffold N50 size (Mb)               | 33.5        |
| Scaffold N50 number                  | 24          |
| Total length (Mb)                    | 778.7       |
| Genome coverage (X)                  | 314.6       |
| Contig number ( $\geq 1$ Mb)         | 219         |
| Length of contig ( $\geq 1$ Mb) (bp) | 565,184,128 |
| The longest contig (bp)              | 8,891,851   |
| The longest scaffold (bp)            | 38,619,456  |
| Genome annotation                    |             |
| Protein-coding gene number           | 24,003      |
| Mean transcript length (kb)          | 16.1        |
| Mean exons per gene                  | 10.1        |
| Mean exon length (bp)                | 217.7       |
| Mean intron length (bp)              | 1527.4      |

Table 2 Hi-C libraries for chromosome-scale assembly of *Oplegnathus fasciatus*

| Chromosome | Number of contigs | Length of contigs | Length of chromosome |
|------------|-------------------|-------------------|----------------------|
| Chr1       | 36                | 19,852,463        | 19,869,963           |
| Chr2       | 51                | 34,905,999        | 34,930,999           |
| Chr3       | 43                | 33,654,321        | 33,675,321           |
| Chr4       | 74                | 35,290,762        | 35,327,262           |
| Chr5       | 54                | 38,592,956        | 38,619,456           |
| Chr6       | 72                | 38,156,734        | 38,192,234           |
| Chr7       | 60                | 35,029,969        | 35,059,469           |
| Chr8       | 64                | 37,546,719        | 37,578,219           |
| Chr9       | 45                | 31,457,603        | 31,479,603           |
| Chr10      | 52                | 35,302,682        | 35,328,182           |
| Chr11      | 80                | 31,971,344        | 32,010,844           |
| Chr12      | 46                | 30,287,574        | 30,310,074           |
| Chr13      | 52                | 33,665,353        | 33,690,853           |

|                        |       |             |             |
|------------------------|-------|-------------|-------------|
| Chr14                  | 101   | 31,190,130  | 31,240,130  |
| Chr15                  | 48    | 30,038,946  | 30,062,446  |
| Chr16                  | 59    | 28,825,591  | 28,854,591  |
| Chr17                  | 33    | 28,220,078  | 28,236,078  |
| Chr18                  | 50    | 26,754,155  | 26,778,655  |
| Chr19                  | 52    | 34,380,882  | 34,406,382  |
| Chr20                  | 52    | 25,675,509  | 25,701,009  |
| Chr21                  | 64    | 31,397,692  | 31,429,192  |
| Chr22                  | 63    | 30,492,179  | 30,523,179  |
| Chr23                  | 70    | 33,514,462  | 33,548,962  |
| Chr24                  | 51    | 31,930,140  | 31,955,140  |
| Unanchored information | 384   | 10,596,846  | -           |
| Total                  | 1,372 | 768,134,243 | 768,808,243 |

Table 3 Genome assembly of *Oplegnathus fasciatus* based on chromosome-length scaffolds

|                                              | Draft scaffolds | Chromosome-length scaffolds based on Hi-C |
|----------------------------------------------|-----------------|-------------------------------------------|
| Length of genome (bp)                        | 778,731,089     | 768,808,243                               |
| Number of contigs                            | 1,692           | 1,372                                     |
| Contigs N50 (bp)                             | 2,149,025       | 2,130,780                                 |
| Number of scaffold                           | /               | 24                                        |
| Scaffold N50 (bp)                            | /               | 33,548,962                                |
| Number of contigs ( $\geq 100$ kb)           | 693             | 708                                       |
| Total length of contigs ( $\geq 100$ kb)     | 735,235,962     | 732,827,446                               |
| Mapping rate of contigs ( $\geq 100$ kb) (%) | /               | 99.67                                     |

Table 4 The detailed classification of repeat sequences of *Oplegnathus fasciatus*

| Type          | Repbse TEs  |             | TE proteins |             | De novo     |             | Combined TEs |             |
|---------------|-------------|-------------|-------------|-------------|-------------|-------------|--------------|-------------|
|               | Length (bp) | % in genome | Length (bp) | % in genome | Length (bp) | % in genome | Length (bp)  | % in genome |
| DNA           | 39,147,527  | 5.03        | 5,390,266   | 0.69        | 93,089,344  | 11.95       | 124,417,402  | 15.98       |
| LINE          | 23,983,322  | 3.08        | 16,460,762  | 2.11        | 57,167,551  | 7.34        | 85,761,250   | 11.01       |
| SINE          | 875,585     | 0.11        | 0           | 0.00        | 914,559     | 0.12        | 1,747,250    | 0.22        |
| LTR           | 10,163,601  | 1.31        | 5,770,483   | 0.74        | 31,126,639  | 4.00        | 42,465,968   | 5.45        |
| Satellite     | 2,028,992   | 0.26        | 0           | 0.00        | 2,613,480   | 0.34        | 4,361,048    | 0.56        |
| Simple_repeat | 1,556,026   | 0.20        | 0           | 0.00        | 5,179,965   | 0.67        | 6,386,303    | 0.82        |
| Other         | 6,545       | 0.00        | 0           | 0.00        | 0           | 0.00        | 6,545        | 0.00        |
| Unknown       | 331,430     | 0.04        | 0           | 0.00        | 20,636,768  | 2.65        | 20,967,052   | 2.69        |
| Total         | 73,544,786  | 9.44        | 27,613,880  | 3.55        | 183,954,095 | 23.62       | 250,611,845  | 32.18       |

## Figure Legends

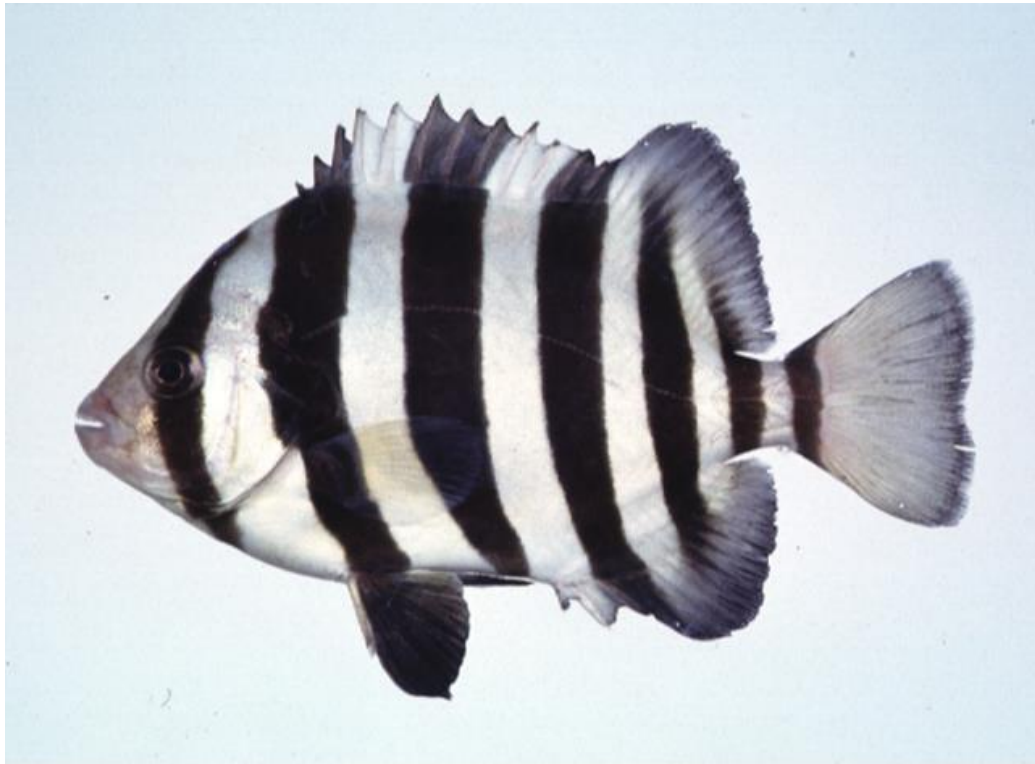

Fig. 1 A representative individual of *O. fasciatus*



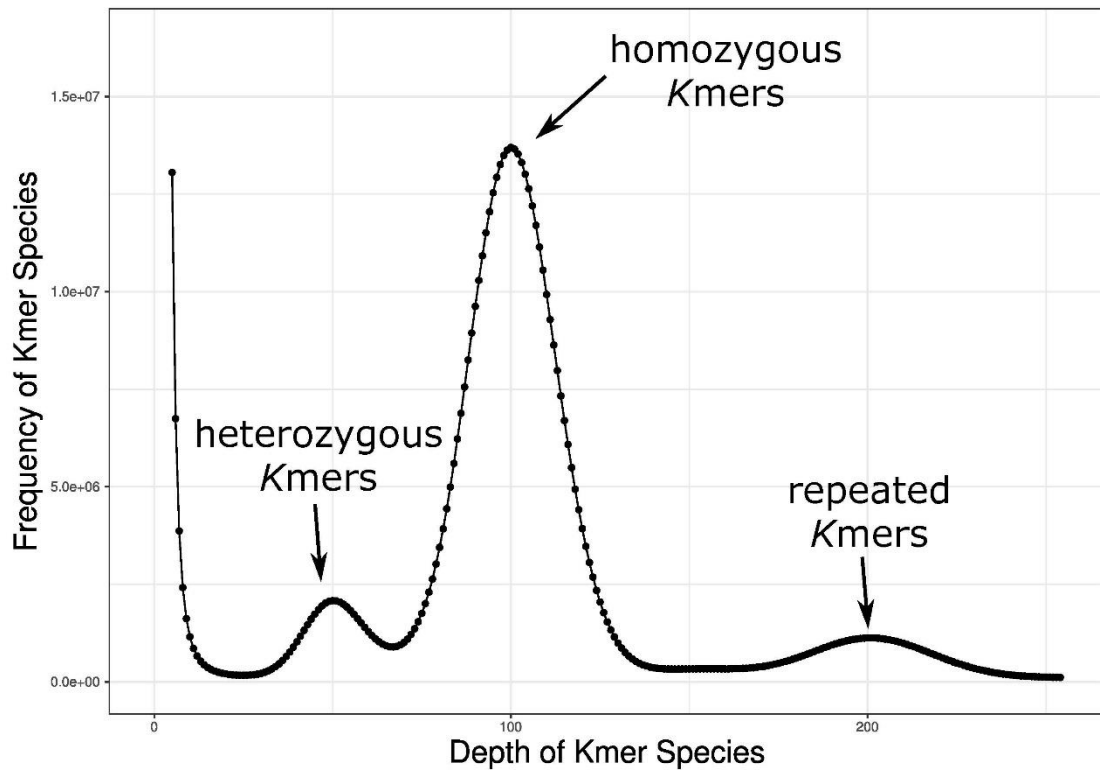

Fig. 2 *k*-mer distribution of the *O. fasciatus* genome

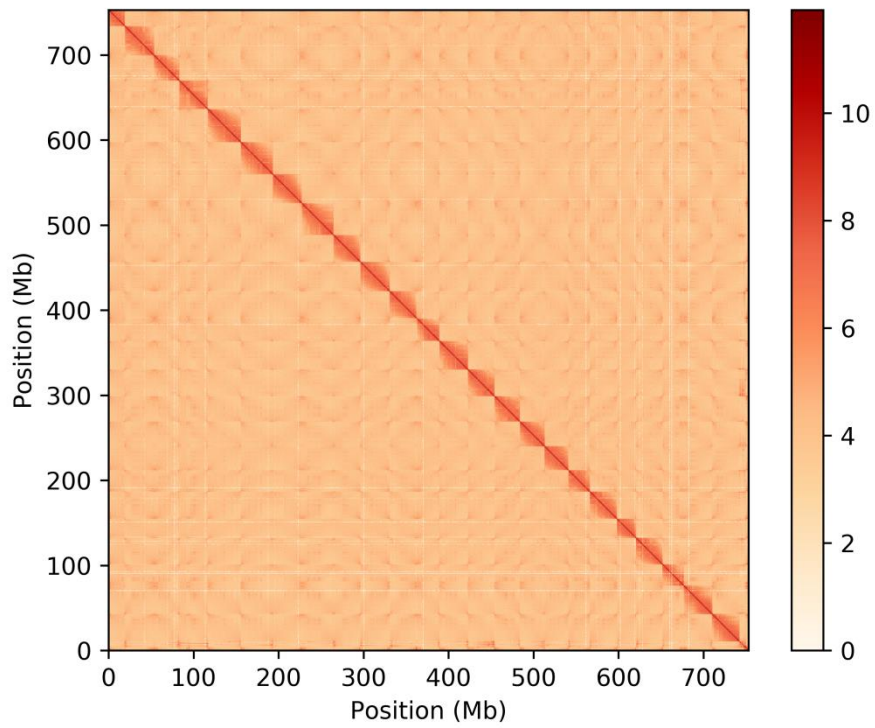

Fig. 3 Hi-C interaction heatmap for *O. fasciatus* reference genome, showing interactions between the 24 chromosomes

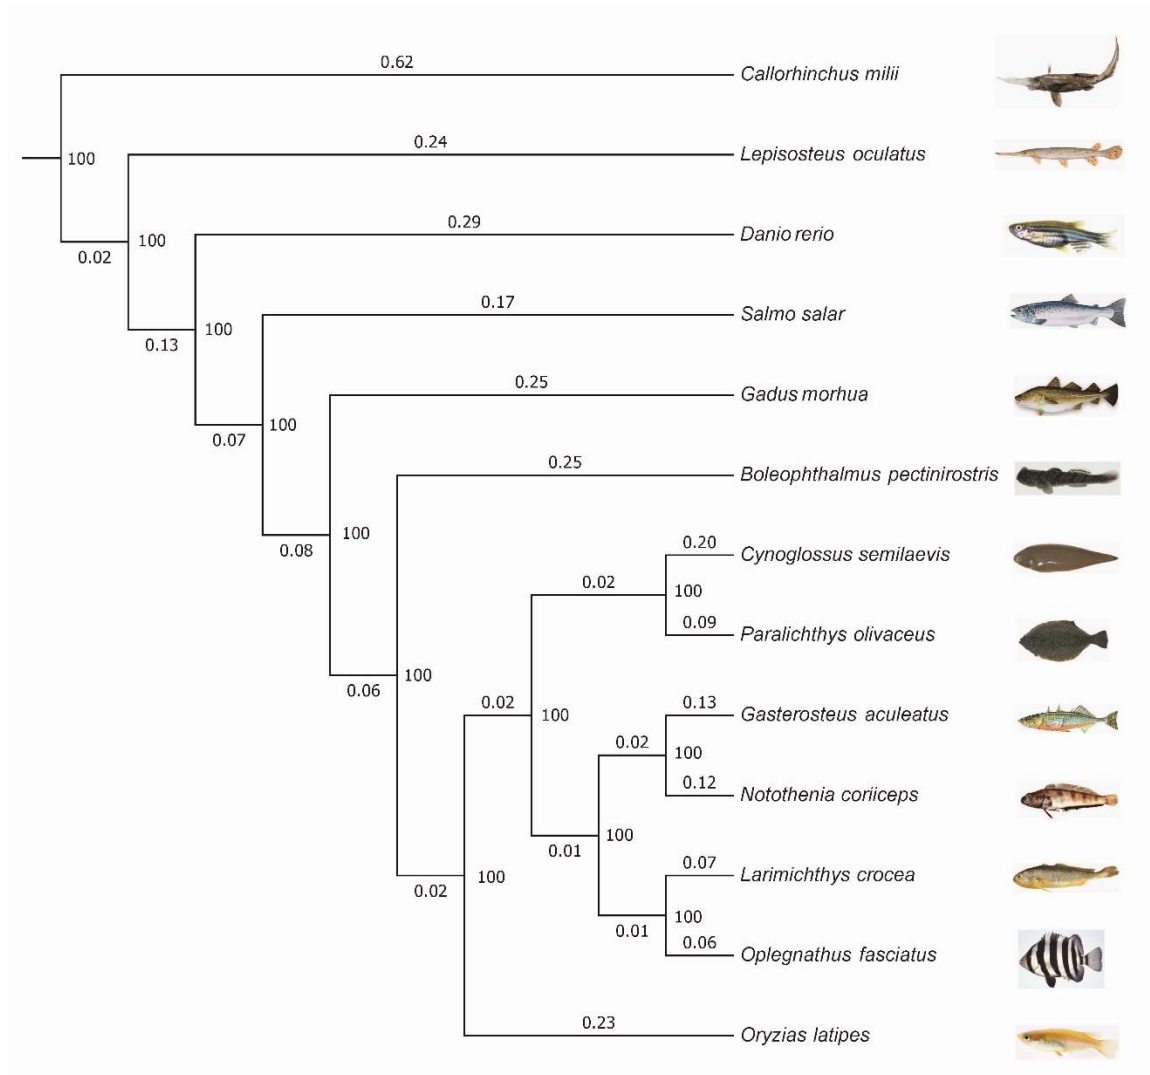

Fig. 4 The phylogenetic relationships of *O. fasciatus* with other fishes. The bootstrap values (larger than 1) calculated from 1000 bootstrap replicates and the branch lengths (smaller than 1) were labelled at and below/above each branch, respectively

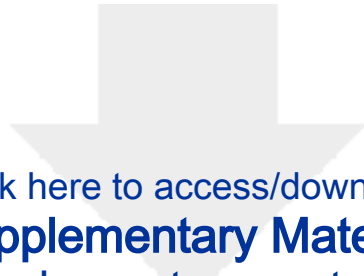

Click here to access/download  
**Supplementary Material**  
4new-supplementary materials.docx

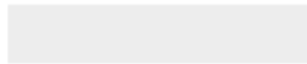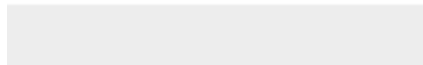

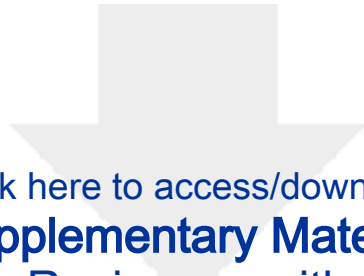

Click here to access/download

**Supplementary Material**

New-Response to Reviewers with point-by-point.doc

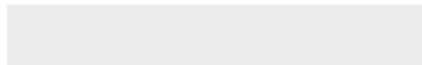

Supplement: giz013_giga-d-18-00300_revision_1.pdf [file giz013_giga-d-18-00300_revision_1.pdf]
