# Supplementary material for: Genome sequence of the barred knifejaw Oplegnathus fasciatus (Temminck & Schlegel, 1844): the first chromosome-level draft genome in the family Oplegnathidae
Source: PubMed Central journal article supplement (PMC6423371; doi:10.1093/gigascience/giz013), 2019-02-01

# GigaScience

## Genome sequence of the barred knifejaw *Oplegnathus fasciatus* (Temminck & Schlegel, 1844): the first chromosome-level draft genome in the family Oplegnathidae --Manuscript Draft--

|                                                      |                                                                                                                                                                                                                                                                                                                                                                                                                                                                                                                                                                                                                                                                                                                                                                                                                                                                                                                                                                                                                                                                                                                                                                                                                                                                                                                                                                                                                                                                                                                                                                                                                                                                                                                                                                                                                                                                                                                                                                                                                                                                                                                                                                                                                                                                                                                                                                                                                                                                                                                                                                                                                   |                        |
|------------------------------------------------------|-------------------------------------------------------------------------------------------------------------------------------------------------------------------------------------------------------------------------------------------------------------------------------------------------------------------------------------------------------------------------------------------------------------------------------------------------------------------------------------------------------------------------------------------------------------------------------------------------------------------------------------------------------------------------------------------------------------------------------------------------------------------------------------------------------------------------------------------------------------------------------------------------------------------------------------------------------------------------------------------------------------------------------------------------------------------------------------------------------------------------------------------------------------------------------------------------------------------------------------------------------------------------------------------------------------------------------------------------------------------------------------------------------------------------------------------------------------------------------------------------------------------------------------------------------------------------------------------------------------------------------------------------------------------------------------------------------------------------------------------------------------------------------------------------------------------------------------------------------------------------------------------------------------------------------------------------------------------------------------------------------------------------------------------------------------------------------------------------------------------------------------------------------------------------------------------------------------------------------------------------------------------------------------------------------------------------------------------------------------------------------------------------------------------------------------------------------------------------------------------------------------------------------------------------------------------------------------------------------------------|------------------------|
| <b>Manuscript Number:</b>                            | GIGA-D-18-00300R2                                                                                                                                                                                                                                                                                                                                                                                                                                                                                                                                                                                                                                                                                                                                                                                                                                                                                                                                                                                                                                                                                                                                                                                                                                                                                                                                                                                                                                                                                                                                                                                                                                                                                                                                                                                                                                                                                                                                                                                                                                                                                                                                                                                                                                                                                                                                                                                                                                                                                                                                                                                                 |                        |
| <b>Full Title:</b>                                   | Genome sequence of the barred knifejaw <i>Oplegnathus fasciatus</i> (Temminck & Schlegel, 1844): the first chromosome-level draft genome in the family Oplegnathidae                                                                                                                                                                                                                                                                                                                                                                                                                                                                                                                                                                                                                                                                                                                                                                                                                                                                                                                                                                                                                                                                                                                                                                                                                                                                                                                                                                                                                                                                                                                                                                                                                                                                                                                                                                                                                                                                                                                                                                                                                                                                                                                                                                                                                                                                                                                                                                                                                                              |                        |
| <b>Article Type:</b>                                 | Data Note                                                                                                                                                                                                                                                                                                                                                                                                                                                                                                                                                                                                                                                                                                                                                                                                                                                                                                                                                                                                                                                                                                                                                                                                                                                                                                                                                                                                                                                                                                                                                                                                                                                                                                                                                                                                                                                                                                                                                                                                                                                                                                                                                                                                                                                                                                                                                                                                                                                                                                                                                                                                         |                        |
| <b>Funding Information:</b>                          | Shandong Province Key Research and Invention Program (2017GHY15102, 2017GHY15106)                                                                                                                                                                                                                                                                                                                                                                                                                                                                                                                                                                                                                                                                                                                                                                                                                                                                                                                                                                                                                                                                                                                                                                                                                                                                                                                                                                                                                                                                                                                                                                                                                                                                                                                                                                                                                                                                                                                                                                                                                                                                                                                                                                                                                                                                                                                                                                                                                                                                                                                                 | Prof. shuang Yong Xiao |
|                                                      | Young Scientists Fund (41506170)                                                                                                                                                                                                                                                                                                                                                                                                                                                                                                                                                                                                                                                                                                                                                                                                                                                                                                                                                                                                                                                                                                                                                                                                                                                                                                                                                                                                                                                                                                                                                                                                                                                                                                                                                                                                                                                                                                                                                                                                                                                                                                                                                                                                                                                                                                                                                                                                                                                                                                                                                                                  | Prof. shuang Yong Xiao |
| <b>Abstract:</b>                                     | <p><b>Background</b><br/>The barred knifejaw (<i>Oplegnathus fasciatus</i>), a member of the Oplegnathidae family of the Centrarchiformes, is a commercially important rocky reef fish native to East Asia. <i>O. fasciatus</i> has become an important fishery resource for offshore cage aquaculture and fish stocking of marine ranching in China, Japan and Korea. Recently, sexual dimorphism in growth with neo-sex chromosome and widespread biotic diseases in <i>O. fasciatus</i> has been received increasing concern. However, adequate genome resources for gaining insight into sex-determining mechanisms and establishing genetically resistant breeding systems for <i>O. fasciatus</i> are lacking. Here, we analysed the entire genome of a female <i>O. fasciatus</i> fish using long-read sequencing and Hi-C data to generate chromosome-length scaffolds and a highly contiguous genome assembly.</p> <p><b>Findings</b><br/>We assembled the <i>O. fasciatus</i> genome with a total of 245.0 Gb of raw reads that were generated using both of PacBio Sequel and Illumina HiSeq 2000 platforms. The final draft genome assembly was approximately 778.7 Mb, which reached a high level of continuity with a contig N50 of 2.1 Mb. The genome size was consistent with the estimated genome size (777.5 Mb) based on k-mer analysis. We combined Hi-C data with a draft genome assembly to generate chromosome-length scaffolds. Twenty-four scaffolds corresponding to the twenty-four chromosomes were assembled to a final size of 768.8 Mb with a contig N50 of 2.1 Mb and a scaffold N50 of 33.5 Mb using 1,372 contigs. The identified repeat sequences accounted for 33.9% of the entire genome, and 24,003 protein-coding genes with an average of 10.1 exons per gene were annotated using de novo methods, with RNA-seq data and homologies to other teleosts. According to phylogenetic analysis using protein-coding genes, <i>O. fasciatus</i> is closely related to <i>Larimichthys crocea</i>, with <i>O. fasciatus</i> diverging from their common ancestor approximately 70.5-88.5 million years ago.</p> <p><b>Conclusions</b><br/>We generated a high-quality draft genome with chromosome assembly for <i>O. fasciatus</i> using long reads by using the PacBio sequencing technologies, which represents the first chromosome-level reference genome for Oplegnathidae species. Assembly of this genome will provide insight into sex-determining mechanisms and serve as a resource for accelerating genome-assisted improvements in resistant breeding systems.</p> |                        |
| <b>Corresponding Author:</b>                         | shuang Yong Xiao<br><br>CHINA                                                                                                                                                                                                                                                                                                                                                                                                                                                                                                                                                                                                                                                                                                                                                                                                                                                                                                                                                                                                                                                                                                                                                                                                                                                                                                                                                                                                                                                                                                                                                                                                                                                                                                                                                                                                                                                                                                                                                                                                                                                                                                                                                                                                                                                                                                                                                                                                                                                                                                                                                                                     |                        |
| <b>Corresponding Author Secondary Information:</b>   |                                                                                                                                                                                                                                                                                                                                                                                                                                                                                                                                                                                                                                                                                                                                                                                                                                                                                                                                                                                                                                                                                                                                                                                                                                                                                                                                                                                                                                                                                                                                                                                                                                                                                                                                                                                                                                                                                                                                                                                                                                                                                                                                                                                                                                                                                                                                                                                                                                                                                                                                                                                                                   |                        |
| <b>Corresponding Author's Institution:</b>           |                                                                                                                                                                                                                                                                                                                                                                                                                                                                                                                                                                                                                                                                                                                                                                                                                                                                                                                                                                                                                                                                                                                                                                                                                                                                                                                                                                                                                                                                                                                                                                                                                                                                                                                                                                                                                                                                                                                                                                                                                                                                                                                                                                                                                                                                                                                                                                                                                                                                                                                                                                                                                   |                        |
| <b>Corresponding Author's Secondary Institution:</b> |                                                                                                                                                                                                                                                                                                                                                                                                                                                                                                                                                                                                                                                                                                                                                                                                                                                                                                                                                                                                                                                                                                                                                                                                                                                                                                                                                                                                                                                                                                                                                                                                                                                                                                                                                                                                                                                                                                                                                                                                                                                                                                                                                                                                                                                                                                                                                                                                                                                                                                                                                                                                                   |                        |

|                                                |                                                                                                                                                                                                                                                                                                                                                                                                                                                                                                                                                                                                                                                                                                                                                                                                                                                                                                                                                                                                                                                                                                                                                                                                                                                                                                                                                                                                                                                                                                                                                                                                                                                                                                                                                                                                                                                                                                                                                                                                                                                                                                                                                                                                                                                                                                                                                                                                                                                                                                                                                                                                                                                                                                                                                                                                                                                                                                                                                                                                                                                                                                                                                                                                                                                                                                                                                                                                                                                                                                                                                                            |
|------------------------------------------------|----------------------------------------------------------------------------------------------------------------------------------------------------------------------------------------------------------------------------------------------------------------------------------------------------------------------------------------------------------------------------------------------------------------------------------------------------------------------------------------------------------------------------------------------------------------------------------------------------------------------------------------------------------------------------------------------------------------------------------------------------------------------------------------------------------------------------------------------------------------------------------------------------------------------------------------------------------------------------------------------------------------------------------------------------------------------------------------------------------------------------------------------------------------------------------------------------------------------------------------------------------------------------------------------------------------------------------------------------------------------------------------------------------------------------------------------------------------------------------------------------------------------------------------------------------------------------------------------------------------------------------------------------------------------------------------------------------------------------------------------------------------------------------------------------------------------------------------------------------------------------------------------------------------------------------------------------------------------------------------------------------------------------------------------------------------------------------------------------------------------------------------------------------------------------------------------------------------------------------------------------------------------------------------------------------------------------------------------------------------------------------------------------------------------------------------------------------------------------------------------------------------------------------------------------------------------------------------------------------------------------------------------------------------------------------------------------------------------------------------------------------------------------------------------------------------------------------------------------------------------------------------------------------------------------------------------------------------------------------------------------------------------------------------------------------------------------------------------------------------------------------------------------------------------------------------------------------------------------------------------------------------------------------------------------------------------------------------------------------------------------------------------------------------------------------------------------------------------------------------------------------------------------------------------------------------------------|
| <b>First Author:</b>                           | shuang Yong Xiao                                                                                                                                                                                                                                                                                                                                                                                                                                                                                                                                                                                                                                                                                                                                                                                                                                                                                                                                                                                                                                                                                                                                                                                                                                                                                                                                                                                                                                                                                                                                                                                                                                                                                                                                                                                                                                                                                                                                                                                                                                                                                                                                                                                                                                                                                                                                                                                                                                                                                                                                                                                                                                                                                                                                                                                                                                                                                                                                                                                                                                                                                                                                                                                                                                                                                                                                                                                                                                                                                                                                                           |
| <b>First Author Secondary Information:</b>     |                                                                                                                                                                                                                                                                                                                                                                                                                                                                                                                                                                                                                                                                                                                                                                                                                                                                                                                                                                                                                                                                                                                                                                                                                                                                                                                                                                                                                                                                                                                                                                                                                                                                                                                                                                                                                                                                                                                                                                                                                                                                                                                                                                                                                                                                                                                                                                                                                                                                                                                                                                                                                                                                                                                                                                                                                                                                                                                                                                                                                                                                                                                                                                                                                                                                                                                                                                                                                                                                                                                                                                            |
| <b>Order of Authors:</b>                       | shuang Yong Xiao                                                                                                                                                                                                                                                                                                                                                                                                                                                                                                                                                                                                                                                                                                                                                                                                                                                                                                                                                                                                                                                                                                                                                                                                                                                                                                                                                                                                                                                                                                                                                                                                                                                                                                                                                                                                                                                                                                                                                                                                                                                                                                                                                                                                                                                                                                                                                                                                                                                                                                                                                                                                                                                                                                                                                                                                                                                                                                                                                                                                                                                                                                                                                                                                                                                                                                                                                                                                                                                                                                                                                           |
|                                                | zhong Zhi Xiao                                                                                                                                                                                                                                                                                                                                                                                                                                                                                                                                                                                                                                                                                                                                                                                                                                                                                                                                                                                                                                                                                                                                                                                                                                                                                                                                                                                                                                                                                                                                                                                                                                                                                                                                                                                                                                                                                                                                                                                                                                                                                                                                                                                                                                                                                                                                                                                                                                                                                                                                                                                                                                                                                                                                                                                                                                                                                                                                                                                                                                                                                                                                                                                                                                                                                                                                                                                                                                                                                                                                                             |
|                                                | Jing Liu                                                                                                                                                                                                                                                                                                                                                                                                                                                                                                                                                                                                                                                                                                                                                                                                                                                                                                                                                                                                                                                                                                                                                                                                                                                                                                                                                                                                                                                                                                                                                                                                                                                                                                                                                                                                                                                                                                                                                                                                                                                                                                                                                                                                                                                                                                                                                                                                                                                                                                                                                                                                                                                                                                                                                                                                                                                                                                                                                                                                                                                                                                                                                                                                                                                                                                                                                                                                                                                                                                                                                                   |
|                                                | yuan Dao Ma                                                                                                                                                                                                                                                                                                                                                                                                                                                                                                                                                                                                                                                                                                                                                                                                                                                                                                                                                                                                                                                                                                                                                                                                                                                                                                                                                                                                                                                                                                                                                                                                                                                                                                                                                                                                                                                                                                                                                                                                                                                                                                                                                                                                                                                                                                                                                                                                                                                                                                                                                                                                                                                                                                                                                                                                                                                                                                                                                                                                                                                                                                                                                                                                                                                                                                                                                                                                                                                                                                                                                                |
|                                                | Jun Li                                                                                                                                                                                                                                                                                                                                                                                                                                                                                                                                                                                                                                                                                                                                                                                                                                                                                                                                                                                                                                                                                                                                                                                                                                                                                                                                                                                                                                                                                                                                                                                                                                                                                                                                                                                                                                                                                                                                                                                                                                                                                                                                                                                                                                                                                                                                                                                                                                                                                                                                                                                                                                                                                                                                                                                                                                                                                                                                                                                                                                                                                                                                                                                                                                                                                                                                                                                                                                                                                                                                                                     |
| <b>Order of Authors Secondary Information:</b> |                                                                                                                                                                                                                                                                                                                                                                                                                                                                                                                                                                                                                                                                                                                                                                                                                                                                                                                                                                                                                                                                                                                                                                                                                                                                                                                                                                                                                                                                                                                                                                                                                                                                                                                                                                                                                                                                                                                                                                                                                                                                                                                                                                                                                                                                                                                                                                                                                                                                                                                                                                                                                                                                                                                                                                                                                                                                                                                                                                                                                                                                                                                                                                                                                                                                                                                                                                                                                                                                                                                                                                            |
| <b>Response to Reviewers:</b>                  | <p>Editor reports:<br/> Your manuscript "Genome sequence of the barred knifejaw <i>Oplegnathus fasciatus</i> (Temminck &amp; Schlegel, 1844): the first chromosome-level draft genome in the family Oplegnathidae" (GIGA-D-18-00300R1) has been re-reviewed by our reviewers. Based on these reports, and my own assessment as Editor, I am pleased to inform you that it is potentially acceptable for publication in GigaScience, once you have carried out some final essential revisions suggested by our reviewers. Please also add the citation details for the GigaDB in the paper.</p> <p>Reply:<br/> Thanks a lot for the editor's suggestion. We have add the citation details for the GigaDB in the paper.<br/> We also have revised the time of our subject as "Oplegnathus fasciatus (Temminck &amp; Schlegel, 1844)".</p> <p>Reviewer reports:<br/> Reviewer #1: The authors have restructured and considerably improved the manuscript, accommodating most of my suggestions. I have some final comments, which are mostly cosmetic:</p> <p>My previous comments 3/4, on the k-mer distribution - now at lines 112: this is still not very clear. I understand that the repeat content is based on fitting a model to the distribution. I do not fully agree that the peak labeled as repeated k-mers should be identified with generic repeat content, I think these are very clearly duplications (which are, of course, technically repeat content).</p> <p>I would suggest to clarify the genome size calculation itself, which is now incorrect (line 112): <math>8.09 \times 10^{10} / 100 = 777.5 \text{ Mb}</math>.</p> <p>Reply:<br/> We agreed with the reviewer's comment on that the peak labeled as repeated k-mers should be identified as generic repeat content. Strictly speaking, the majority of k-mers after the 1.8 times larger than the main depth (100 in our case) were most likely from the repeated regions, including the duplications that mentioned in the comment. That is also the way we estimated the repeat ratio of the genome.<br/> We are sorry that the method for the genome size estimation was not clear enough. To clarify the method, the following formula were used : genome size = <math>(Nk\text{-mer} - Nerror\_k\text{-mer}) / D</math>, where G is genome size, Nk-mer is the number of k-mers, Nerror_k-mer is the number of k-mers with the depth of 1, and D is the k-mer depth. The number of k-mers with depth of 1 were eliminated since k-mers with low depth were likely from the sequencing errors. As a result, the genome size was estimated as 777.5Mb. We have revised the description of genome size estimation method in the manuscript.</p> <p>Line 132, 'complexity ... such as heterozygosity': This does not fit the very low heterozygosity levels just identified from the k-mer profile. Possibly structural variants instead of SNPs? I don't think the high duplication levels can explain this?</p> <p>Reply:<br/> We agreed with the reviewer's comment on that genome complexity derived from the structural variants might also increase size of the genome assembly. So we revised the sentence as "The genome complexity, such as structural variants and heterozygosity might be possible reasons to explain the relative large genome size in the assembly."</p> <p>Line 162: 'filter all base sequences than 500 bp': more than 500 bp? Less than 500 bp?</p> <p>Reply:<br/> We would like to give sincere thanks to reviewer's suggestions. We revised "filter all</p> |

|                                                                                                                                                                                                                                                                                                                                                                                                                                                                                                                                     |                                                                                                                                                                                                                                                                                                                                                                                                                                                                                                                                                                                                                                                                                               |
|-------------------------------------------------------------------------------------------------------------------------------------------------------------------------------------------------------------------------------------------------------------------------------------------------------------------------------------------------------------------------------------------------------------------------------------------------------------------------------------------------------------------------------------|-----------------------------------------------------------------------------------------------------------------------------------------------------------------------------------------------------------------------------------------------------------------------------------------------------------------------------------------------------------------------------------------------------------------------------------------------------------------------------------------------------------------------------------------------------------------------------------------------------------------------------------------------------------------------------------------------|
|                                                                                                                                                                                                                                                                                                                                                                                                                                                                                                                                     | <p>base sequences than 500 bp” as “filter all base sequences more than 500 bp”</p> <p>There is a lot of redundancy between tables 1 &amp; 3, I would suggest either merging these or moving the finer details of the assembly to table 3 (and keep table 1 as an overview of the final results, just N50/genome size/coverage).</p> <p>Reply: Thanks a lot for the reviewer’s suggestion. We have merged the Table 3 to Table 1 to eliminate the information redundancy.</p> <p>Table 2 would be more appropriate in the supplementary information.</p> <p>Reply: Thanks a lot for the reviewer’s comment. The Table 2 was moved into the supplementary data according to the suggestion.</p> |
| <b>Additional Information:</b>                                                                                                                                                                                                                                                                                                                                                                                                                                                                                                      |                                                                                                                                                                                                                                                                                                                                                                                                                                                                                                                                                                                                                                                                                               |
| <b>Question</b>                                                                                                                                                                                                                                                                                                                                                                                                                                                                                                                     | <b>Response</b>                                                                                                                                                                                                                                                                                                                                                                                                                                                                                                                                                                                                                                                                               |
| Are you submitting this manuscript to a special series or article collection?                                                                                                                                                                                                                                                                                                                                                                                                                                                       | No                                                                                                                                                                                                                                                                                                                                                                                                                                                                                                                                                                                                                                                                                            |
| <p><b>Experimental design and statistics</b></p> <p>Full details of the experimental design and statistical methods used should be given in the Methods section, as detailed in our <a href="#">Minimum Standards Reporting Checklist</a>. Information essential to interpreting the data presented should be made available in the figure legends.</p> <p>Have you included all the information requested in your manuscript?</p>                                                                                                  | Yes                                                                                                                                                                                                                                                                                                                                                                                                                                                                                                                                                                                                                                                                                           |
| <p><b>Resources</b></p> <p>A description of all resources used, including antibodies, cell lines, animals and software tools, with enough information to allow them to be uniquely identified, should be included in the Methods section. Authors are strongly encouraged to cite <a href="#">Research Resource Identifiers</a> (RRIDs) for antibodies, model organisms and tools, where possible.</p> <p>Have you included the information requested as detailed in our <a href="#">Minimum Standards Reporting Checklist</a>?</p> | Yes                                                                                                                                                                                                                                                                                                                                                                                                                                                                                                                                                                                                                                                                                           |
| <p><b>Availability of data and materials</b></p> <p>All datasets and code on which the conclusions of the paper rely must be</p>                                                                                                                                                                                                                                                                                                                                                                                                    | Yes                                                                                                                                                                                                                                                                                                                                                                                                                                                                                                                                                                                                                                                                                           |

either included in your submission or deposited in [publicly available repositories](#) (where available and ethically appropriate), referencing such data using a unique identifier in the references and in the “Availability of Data and Materials” section of your manuscript.

Have you have met the above requirement as detailed in our [Minimum Standards Reporting Checklist](#)?

[Click here to view linked References](#)

1 **Genome sequence of the barred knifejaw *Oplegnathus***  
2 ***fasciatus* (Temminck & Schlegel, 1844): the first**  
3 **chromosome-level draft genome in the family Oplegnathidae**

4  
5 Yongshuang Xiao<sup>1,2,3\*</sup> †, Zhizhong Xiao<sup>1,2,3, †</sup>, Daoyuan Ma<sup>1,2,3</sup>, Jing Liu<sup>2,3\*</sup>, Jun  
6 Li<sup>1,2,3\*</sup>

7 <sup>1</sup>Institute of Oceanology, Chinese Academy of Sciences, 7 Nanhai Road, Qingdao,  
8 266071, China, <sup>2</sup> Laboratory for Marine Biology and Biotechnology, Qingdao  
9 National Laboratory for Marine Science and Technology, 7 Nanhai Road, Qingdao,  
10 266071, China, <sup>3</sup>Center for Ocean Mega-Science, Chinese Academy of Sciences, 7  
11 Nanhai Road, Qingdao, 266071, China

12  
13  
14  
15  
16  
17 \*Correspondence address: Yongshuang Xiao, Mega-Science, Chinese Academy of  
18 Sciences, 7 Nanhai Road, Qingdao, 266071, China; Tel: +86-053282896729; E-mail:  
19 dahaishuang1982@163.com; Jing Liu, Institute of Oceanology, Chinese Academy of  
20 Sciences, 7 Nanhai Road, Qingdao, 266071, China; Tel: +86-053282898790; E-mail:  
21 jliu@qdio.ac.cn; Jun Li, Institute of Oceanology, Chinese Academy of Sciences, 7  
22 Nanhai Road, Qingdao, 266071, China; Tel: +86-053282898718; E-mail:  
23 junli@qdio.ac.cn.

24 †Contributed equally to this work.

25 Yongshuang Xiao, ORCID: 0000-0002-1979-4555

26 Zhizhong Xiao, ORCID: 0000-0003-2403-1381

27 Daoyuan Ma, ORCID: 0000-0002-9271-4371

28

1  
2  
3  
4  
5  
6  
7  
8  
9  
10  
11  
12  
13  
14  
15  
16  
17  
18  
19  
20  
21  
22  
23  
24  
25  
26  
27  
28  
29 **Abstract**

30 **Background**

31 The barred knifejaw (*Oplegnathus fasciatus*), a member of the Oplegnathidae family  
32 of the Centrarchiformes, is a commercially important rocky reef fish native to East  
33 Asia. *O. fasciatus* has become an important fishery resource for offshore cage  
34 aquaculture and fish stocking of marine ranching in China, Japan and Korea. Recently,  
35 sexual dimorphism in growth with neo-sex chromosome and widespread biotic  
36 diseases in *O. fasciatus* has been received increasing concern. However, adequate  
37 genome resources for gaining insight into sex-determining mechanisms and  
38 establishing genetically resistant breeding systems for *O. fasciatus* are lacking. Here,  
39 we analysed the entire genome of a female *O. fasciatus* fish using long-read  
40 sequencing and Hi-C data to generate chromosome-length scaffolds and a highly  
41 contiguous genome assembly.

42 **Findings**

43 We assembled the *O. fasciatus* genome with a total of 245.0 Gb of raw reads that were  
44 generated using both PacBio Sequel and Illumina HiSeq 2000 platforms. The final  
45 draft genome assembly was approximately 778.7 Mb, which reached a high level of  
46 continuity with a contig N50 of 2.1 Mb. The genome size was consistent with the  
47 estimated genome size (777.5 Mb) based on *k*-mer analysis. We combined Hi-C data  
48 with a draft genome assembly to generate chromosome-length scaffolds. Twenty-four  
49 scaffolds corresponding to the twenty-four chromosomes were assembled to a final  
50 size of 768.8 Mb with a contig N50 of 2.1 Mb and a scaffold N50 of 33.5 Mb using  
51 1,372 contigs. The identified repeat sequences accounted for 33.9% of the entire  
52 genome, and 24,003 protein-coding genes with an average of 10.1 exons per gene  
53 were annotated using *de novo* methods, with RNA-seq data and homologies to other  
54 teleosts. According to phylogenetic analysis using protein-coding genes, *O. fasciatus*  
55 is closely related to *Larimichthys crocea*, with *O. fasciatus* diverging from their  
56 common ancestor approximately 70.5-88.5 million years ago.

57 **Conclusions**

58 We generated a high-quality draft genome for *O. fasciatus* using long-read PacBio  
59  
60  
61  
62  
63  
64  
65

59 sequencing technology, which represents the first chromosome-level reference  
60 genome for Oplegnathidae species. Assembly of this genome assists research into fish  
61 sex-determining mechanisms and can serve as a resource for accelerating  
62 genome-assisted improvements in resistant breeding systems.

63 *Keywords:* *Oplegnathus fasciatus*; chromosome-level genome assembly; Hi-C  
64 assembly; sex-determining mechanism

## 65 **Data description**

### 66 **Introduction of *O. fasciatus***

67 The Oplegnathidae family belongs to the order Centrarchiformes, including only one  
68 genus *Oplegnathus*, which is comprised of seven species (*O. conwayi*, *O. fasciatus*, *O.*  
69 *insignis*, *O. peaolopesi*, *O. punctatus*, *O. robinsoni*, *O. woodwardi*), two of which (*O.*  
70 *fasciatus* and *O. punctatus*) are commercially valuable in East Asia. The barred  
71 knifejaw *O. fasciatus* (NCBI: txid 163134, Fishbase ID: 1709) (Temminck & Schlegel,  
72 1844) is one of these two species in the *Oplegnathus*, which is commonly found at the  
73 depth of one to ten metres in association with rocky reefs<sup>1,2</sup>, and distributed across a  
74 wide range of shallow waters around Korea, Japan, China and Hawaii<sup>1,3,4</sup> (Fig. 1). *O.*  
75 *fasciatus* has become an important fishery resource for offshore cage aquaculture and  
76 fish stocking of marine ranching in China, Japan and Korea<sup>5</sup>. It has been reported that  
77 the male of *Oplegnathus* possesses a neo-sex chromosome, possibly a sex  
78 chromosome Y. The sex chromosome system for *Oplegnathus* is considered to be X<sub>1</sub>  
79 X<sub>1</sub> X<sub>2</sub> X<sub>2</sub> / X<sub>1</sub> X<sub>2</sub> Y based on karyotype analyses<sup>6,7</sup>. Furthermore, sexual dimorphism  
80 in growth has been detected in the *O. fasciatus*, with male fish exhibiting faster  
81 growth than females, possibly be due to the sex chromosome system in *Oplegnathus*<sup>8</sup>.  
82 *O. fasciatus* is vulnerable to viruses (e.g., Iridovirus) and genetic degradation caused  
83 by inbreeding has led to higher susceptibility to diseases<sup>9,10</sup>. It is vital to develop  
84 genomic resources to gain insight into sex-determining mechanisms and to accelerate  
85 the genome-assisted improvements in resistant breeding systems.

86 So far, a genome sequence with the chromosomal assembly of *O. fasciatus* has  
87 not been reported. Here, we constructed a high-quality chromosome-level reference

1 88 genome assembly for *O. fasciatus* using long reads from the PacBio DNA sequencing  
2 89 platform and a genome assembly strategy taking advantage of the genome assembly  
3 90 program Canu<sup>11</sup>. This genome assembly of *O. fasciatus* is the first chromosome-level  
4 91 reference genome constructed for the Oplegnathidae family. The completeness and  
5 92 continuity of the genome will provide high quality genomic resources for studies on  
6 93 sex-determining mechanisms and for accelerating the genome-assisted improvements  
7 94 in resistant breeding systems.  
8  
9

### 16 96 **Genomic DNA extraction, genome size estimation**

17 97 High-quality genomic DNA for sequencing using the Illumina platform (Illumina Inc.,  
18 98 San Diego, CA, USA) and PacBio Sequel sequencing (Pacific Biosciences of  
19 99 California, Menlo Park, CA, USA) was extracted from fresh muscle tissue and blood  
20 100 samples from a single female *O. fasciatus*. The fish was collected from the near-shore  
21 101 area of Qingdao city (Yellow Sea), Shandong province. The whole-genome size of *O.*  
22 102 *fasciatus* was estimated based on Illumina DNA sequencing technology. A short-insert  
23 103 library (300~350 bp) was constructed and generated a total of ~90.7 Gb of raw reads  
24 104 using the standard protocol provided by the Illumina HiSeq X Ten platform (Illumina  
25 105 Inc., San Diego, CA, USA). After the removal of low-quality and redundant reads, we  
26 106 obtained approximately ~80.8 Gb of clean data for *de novo* assembly to estimate the  
27 107 whole-genome size (S Table 1, Fig. 2). All cleaned reads were subjected to 17-mer  
28 108 frequency distribution analysis<sup>12</sup>. As the total number of *k*-mers were approximately  
29 109  $8.09 \times 10^{10}$  and the peak of *k*-mers was at a depth of 100, the genome size of *O.*  
30 110 *fasciatus* was calculated to be 777.5 Mb using the following formula with amendment:  
31 111  $G = (N_{k\text{-mer}} - N_{\text{error}_k\text{-mer}}) / D$ , where *G* is genome size,  $N_{k\text{-mer}}$  is the number of *k*-mers,  
32 112  $N_{\text{error}_k\text{-mer}}$  is the number of *k*-mers with the depth of 1, and *D* is the *k*-mer depth (Fig.  
33 113 2). Meanwhile, an estimated heterozygosity of 0.29% and a repeat content of 38.46%  
34 114 were detected for *O. fasciatus* in this work. A pilot genome assembly was  
35 115 approximately 744.5 Mb with a contig N50 of 7.2 kb and a scaffold N50 of 84.1kb  
36 116 using the Illumina data and the assembly program Platanus<sup>13</sup> (S Table 2). The GC  
37 117 content was 41% (S Fig. 1). This first attempt at a genome assembly was of  
38  
39  
40  
41  
42  
43  
44  
45  
46  
47  
48  
49  
50  
51  
52  
53  
54  
55  
56  
57  
58  
59  
60  
61  
62  
63  
64  
65



1 118 low-quality, partly due to its high genomic repeat content.

2 119

3  
4 **120 Genome assembly using PacBio long reads**

5  
6 121 Two 20 kb genomic DNA libraries were constructed and sequenced using the PacBio  
7  
8 122 Sequel platform, generating 62.9 Gb raw DNA reads. We obtained 4.8 million  
9  
10 123 subreads (62.8 Gb in total) with an N50 read length of ~22 kb after removing adaptor  
11  
12 124 (S Table 1).

13  
14 125 Canu v1.4 (Canu, RRID:SCR\_015880) was firstly used to assemble the genome  
15  
16 126 with the Corrected-Error-Rate parameter set at 0.040<sup>11</sup>. As a result, a genome  
17  
18 127 assembly with a total length of 875.9 Mb was constructed for *O. fasciatus*, slightly  
19  
20 128 higher than the genome size estimated by 17-mer analysis based on the Illumina data  
21  
22 129 (S Table 2). The genome complexity, such as structural variants and heterozygosity  
23  
24 130 might be possible reasons to explain the relative large genome size in the assembly.  
25  
26 131 We therefore applied Redundans v0.13c<sup>14</sup> to remove the sequence redundancy to  
27  
28 132 obtain a genome assembly size of 778.0 Mb. We then used the Arrow tool in SMRT  
29  
30 133 Link 5.0 software with the minCoverage parameter set at 15 to implement error  
31  
32 134 correction based on the PacBio long reads data (Table 1). The resulting genome  
33  
34 135 assembly was further polished using Illumina NGS data, which were used in the  
35  
36 136 genome survey analysis above. The final draft genome assembly was 778.7 Mb,  
37  
38 137 which reached a high level of continuity with a contig N50 length of 2.1 Mb (Table 1).  
39  
40 138 The contig N50 of *O. fasciatus* was much higher than those of previous fish genome  
41  
42 139 assemblies constructed using NGS DNA sequencing technologies and is comparable  
43  
44 140 to those of recently reported model fish species (S table 3). Previous studies  
45  
46 141 illuminated the relationship between read length and genome assembly; therefore, we  
47  
48 142 attributed the continuity of the genome primarily to the application of long reads in  
49  
50 143 the assembly.

51  
52  
53 **144 Hi-C library construction and chromosome assembly**

54  
55 145 Hi-C is a sequencing-based approach for determining chromosome interactions by  
56  
57 146 calculating the contact frequency between pairs of loci, which are strongly dependent  
58  
59 147 upon the one-dimensional distance, in base pairs, between a pair of loci<sup>15,16</sup>. In this  
60  
61  
62  
63  
64  
65

148 work, we used Hi-C to construct the genome assembly of *O. fasciatus*.

149 Genomic DNA was extracted for the Hi-C library from a whole-blood sample of  
150 *O. fasciatus* as previously described<sup>17</sup>. Cells were fixed with formaldehyde and lysed,  
151 and the cross-linked DNA was digested with MboI. Sticky ends were biotin-labelled  
152 and proximity ligated to form chimeric junctions and then physically sheared to a size  
153 of 300–500 bp<sup>17</sup>. Chimeric fragments representing the original cross-linked,  
154 long-distance physical interactions were then processed into paired-end sequencing  
155 libraries, and 629 million 150-bp paired-end Illumina reads (91.5 Gb) were produced  
156 with Q20 and Q30 of ~94.0% (S Table 1, S Table 4). By mapping the Hi-C data to the  
157 PacBio-based assembly using BWA software (BWA, RRID:SCR\_010910), we found  
158 that sequencing data with mates mapped to a different contig (or scaffold) and data  
159 mapped to a different contig (or scaffold) (map Q5  $\geq$  5) were 593.7 Mb (94.4%),  
160 240.5 Mb (40.5%) and 205.1 Mb (34.6%), respectively (S Table 4). We then further  
161 employed BWA and Lachesis software to align paired-end reads to filter all base  
162 sequences than 500bp from each restriction site<sup>18</sup>. According to the conduct of  
163 clustering, ordering, and orienting to the assembly contigs (1,692), these sequences  
164 were grouped into 24 chromosome clusters and scaffolded using Lachesis software  
165 with tuned parameters<sup>19</sup> (S Table 4, Fig. 3). Finally, we constructed the chromosome  
166 interactions map using Juicer software and employed the JucieBox to complete the  
167 visual correction of the interaction map. We obtained polished 1,756 polished contigs  
168 by interrupting misassembly from 1,692 contigs. Twenty-four scaffolds were  
169 assembled corresponding to the 24 chromosomes of *O. fasciatus* based on the  
170 karyotype analyses<sup>6,7</sup> (S Table 4, Fig. 3).

171 A final size of 768.8 Mb accounting for the 98.7% draft genome was assembled,  
172 which showed a high level of continuity with a contig N50 of 2.1 Mb and a scaffold  
173 N50 of 33.5 Mb using 1,372 contigs. The anchor rate of contigs (> 100 kb) to  
174 chromosomes was attained up to the 99.7% based on the Hi-C assembly (Table 1).  
175 The contig N50 and scaffold N50 of *O. fasciatus* were much higher than those of  
176 previous fish genome assemblies constructed using NGS DNA sequencing  
177 technologies based on the genome assembly using PacBio long reads and Hi-C

178 assembly (S table 3).

179

## 180 **Genome quality evaluation**

181 To assess the completeness of the assembled *O. fasciatus* genome, we subjected the  
182 assembled sequences to BUSCO version 3 evaluation (BUSCO. RRID:SCR\_015008)  
183 (BUSCO, actinopterygii\_odb9)<sup>20</sup>. Overall, 96.6% and 1.5% of the 4,584 expected  
184 actinopterygii genes were identified in the assembled genome as complete and partial  
185 BUSCO profiles, respectively. Approximately 85 genes could be considered missing  
186 in our assembly (S table 5). Among the expected complete actinopterygii genes, 4,259  
187 and 171 were identified as single copy and duplicated BUSCOs, respectively (S table  
188 5). We then used Minimap2 to estimate the completeness and homogeneity of genome  
189 assembly based on CLR (Continuous Long Reads) subreads. A high quality of  
190 completeness and homogeneity was assessed in the genome assembly, and the  
191 mapping rate, coverage rate and average sequencing depth reached 90.2%, 99.9% and  
192 80.6, respectively (S table 6). Note that the mapping ratio might be related to the  
193 repetitive content of the *O. fasciatus* genome, especially for the high repeat content in  
194 the sex chromosomes<sup>6</sup>. However, how the repetitive elements in the genome influence  
195 the karyotypes of this species needs further investigation.

196 To further evaluate the accuracy of the *O. fasciatus* genome assembly, we  
197 aligned the NGS-based short reads from the whole-genome sequencing data against  
198 the reference genome using BWA<sup>21</sup>. We then used GATK (GATK,  
199 RRID:SCR\_001876) to implement SNP calling and filter work, and the results  
200 showed that 99.8% and 0.2% of the  $1.6 \times 10^6$  expected SNP reads were identified in  
201 the assembled genome as heterozygous and homologous SNPs, respectively. SNP  
202 calling on the final assembly also yielded a heterozygosity rate of 0.20%, supporting  
203 the *k*-mer estimate analysis (0.29%) (S table 7).

204

## 205 **Repeat sequences within the *O. fasciatus* genome assembly**

206 To identify tandem repeats, we utilized Tandem Repeat Finder to annotate repetitive  
207 elements in the *O. fasciatus* genome. RepeatModeler (RepeatModeler,

1  
2  
3  
4  
5  
6  
7  
8  
9  
10  
11  
12  
13  
14  
15  
16  
17  
18  
19  
20  
21  
22  
23  
24  
25  
26  
27  
28  
29  
30  
31  
32  
33  
34  
35  
36  
37  
38  
39  
40  
41  
42  
43  
44  
45  
46  
47  
48  
49  
50  
51  
52  
53  
54  
55  
56  
57  
58  
59  
60  
61  
62  
63  
64  
65

1  
2  
3  
4  
5  
6  
7  
8  
9  
10  
11  
12  
13  
14  
15  
16  
17  
18  
19  
20  
21  
22  
23  
24  
25  
26  
27  
28  
29  
30  
208 RRID:SCR\_015027) (version 1.04) and LTR\_FINDER (LTR\_Finder,  
209 RRID:SCR\_015247)<sup>22</sup> were used to construct a *de novo* repeat library with default  
210 parameters. Subsequently, we used RepeatMasker (RepeatMasker,  
211 RRID:SCR\_012954)<sup>23</sup> (version 3.2.9) to map our assembled sequences on the  
212 Repbase TE (version 14.04)<sup>24</sup> and the *de novo* repeat library to identify known and  
213 novel transposable elements (TEs). In addition, TE-related proteins were annotated by  
214 using RepeatProteinMask software (version 3.2.2)<sup>23</sup>.

215 The identified repeat sequences accounted for 33.9% of the *O. fasciatus* genome  
216 including repeat sequences with 23.6% of the genome based on the *de novo* repeat  
217 library (Table 2). Approximately 23.4% of the *O. fasciatus* genome was identified as  
218 interspersed repeats (most often TEs). Among them, DNA transposable elements were  
219 the most abundant type of repeat sequences, which occupied 11.5% of the whole  
220 genome. Long interspersed nuclear elements (LINEs) and long terminal repeats (LTRs)  
221 comprised 7.3% and 4.0% of the whole genome, respectively (Table 2, S Fig. 2).

## 222 **RNA preparation and sequencing**

223 We sequenced cDNA libraries prepared from the eggs of *O. fasciatus* that were used  
224 for genome annotation using Illumina sequencing technology. RNA quality was  
225 determined based on the estimation of the ratio of absorbance at 260nm/280nm (OD =  
226 2.0) and the RIN (value = 9.2) by using a Nanodrop ND-1000 spectrophotometer  
227 (LabTech, USA) and a 2100 Bioanalyzer (Agilent Technologies, USA), respectively.  
228 We used the Clontech SMARTer cDNA synthesis kit to complete reverse transcription.  
229 A paired-end library was prepared following the Paired-End Sample Preparation Kit  
230 manual (Illumina Inc., San Diego, CA, USA). Finally, a library with an insert length  
231 of 300 bp was sequenced by Illumina HiSeq X Ten in 150PE mode (Illumina Inc., San  
232 Diego, CA, USA). As a result, we obtained ~42.2 Gb high-quality transcriptome data  
233 from RNA-seq (S Table 1, S table 8).

## 234 **Gene annotation**

235 Gene annotation of the *O. fasciatus* genome was performed using *de novo*,  
236 homology-based and transcriptome sequencing-based predictions. We employed  
237 Augustus (Augustus, RRID:SCR\_008417) (version 2.5.5)<sup>25</sup> and GenScan

1 238 (GENSCAN, RRID:SCR\_012902) (version 1.0)<sup>26</sup> software to predict protein-coding  
2 239 genes in the *O. fasciatus* genome assembly. Protein sequences of closely related fish  
3  
4 240 species including *Larimichthys crocea*, *Lates calcarifer*, *Gasterosteus aculeatus*,  
5  
6 241 *Paralichthys olivaceus*, *Cynoglossus semilaevis* and *Gadus morhua* were downloaded  
7  
8 242 from Ensembl<sup>27</sup> and aligned against the *O. fasciatus* genome using TBLASTN  
9  
10 243 (TBLASTN, RRID:SCR\_011822) software<sup>28</sup>. Subsequently, Genewise2.2.0  
11  
12 244 (GeneWise, RRID:SCR\_015054) software<sup>29</sup> was employed to predict potential gene  
13  
14 245 structures on all alignments.

16 246 We also mapped these NGS transcriptome short reads onto our genome assembly  
17  
18 247 using TopHat1.2 (TopHat, RRID:SCR\_013035) software<sup>30</sup>, and then we employed  
19  
20 248 Cufflinks (Cufflinks, RRID:SCR\_014597)<sup>31</sup> to predict gene structures (S table 9). All  
21  
22 249 gene models were then integrated using MAKER (MAKER, RRID:SCR\_005309) to  
23  
24 250 obtain a consensus gene set<sup>32</sup>. The final total gene set was composed of 24,003 genes  
25  
26 251 with an average of 10.1 exons per gene in the *O. fasciatus* genome (Table 1). The  
27  
28 252 gene number, gene length distribution, CDS length distribution, exon length  
29  
30 253 distribution and intron length distribution were all comparable with those of other  
31  
32 254 teleost fish species (S table 9, S Fig. 3).

33 255 To obtain further functional annotation of the protein-coding genes in the *O.*  
34  
35 256 *fasciatus* genome, we employed the local BLASTX (BLASTX, RRID:SCR\_001653)  
36  
37 257 and BLASTN (BLASTN, RRID:SCR\_001598) programs and the Swiss-prot database  
38  
39 258 with an e-value  $\leq 1e-5^{33}$  to align the non-redundant nucleotide (NT) and  
40  
41 259 non-redundant protein (NR), respectively. We also used Blast2GO (Blast2GO,  
42  
43 260 RRID:SCR\_005828) software to search the Gene ontology (GO), and Kyoto  
44  
45 261 Encyclopaedia of Genes and Genomes (KEGG) pathway databases<sup>34, 35, 36</sup>. Ultimately,  
46  
47 262 97.3% (23,364 genes) of the 24,003 genes were annotated by at least one database (S  
48  
49 263 Table 10). Four types of non-coding RNAs (microRNAs, transfer RNAs, ribosomal  
50  
51 264 RNAs, and small nuclear RNAs) were also annotated using the tRNAscan-SE  
52  
53 265 (tRNAscan-SE, RRID:SCR\_010835) and the Rfam database<sup>37, 38</sup> (S Table 11).

### 54 266 **Gene family identification and phylogenetic tree construction**

55 267 We employed the BLASTP (BLASTP, RRID:SCR\_001010) program<sup>39</sup> with an  
56  
57  
58  
59  
60  
61  
62  
63  
64  
65

1 268 e-value threshold of 1e-5 to identify gene families based on the transcript alignments  
2  
3 269 of each gene from *O. fasciatus* and other fish species, which included *Larimichthys*  
4  
5 270 *crocea*, *Gadus morhua*, *Paralichthys olivaceus*, *Cynoglossus semilaevis*, *Notothenia*  
6  
7 271 *coriiceps*, *Boleophthalmus pectinirostris*, *Lepisosteus oculatus*, *Gasterosteus*  
8  
9 272 *aculeatus*, *Callorhinchus milii*, *Danio rerio*, *Salmo salar* and *Oryzias latipes*. 21,528  
10  
11 273 gene families were identified by clustering the homologous gene sequences based on  
12  
13 274 H-scores calculated from Bit-score using Hcluster\_sg software (S Fig. 4).  
14  
15 275 Subsequently, we selected 1,236 single-copy orthogroups from the above-mentioned  
16  
17 276 species to construct the phylogenetic relationship between *O. fasciatus* and other fish  
18  
19 277 species. We used the ClustalW (ClustalW, RRID:SCR\_002909) program<sup>40</sup> to extract  
20  
21 278 and align coding sequences of single-copy genes from the 1,158 orthogroups with a  
22  
23 279 length filter (S Fig. 5). All the alignments were concatenated as a single data set for  
24  
25 280 each species. Nondegenerated sites extracted from the data set were then joined into  
26  
27 281 new sequences for each species to construct a phylogenetic tree based on the  
28  
29 282 maximum-likelihood method implemented in the PhyML package<sup>41</sup> (with the -m  
30  
31 283 PROTGAMMAAUTO model). We used the MCMCtree program to estimate  
32  
33 284 divergence times among species based on the approximate likelihood method<sup>42</sup> and  
34  
35 285 molecular clock data from the divergence time between medaka from the TimeTree  
36  
37 286 database<sup>43</sup>. According to the phylogenetic analysis, *O. fasciatus* (Eupercaria:  
38  
39 287 Centrarchiformes) clustered with *Larimichthys crocea* in the order Perciformes  
40  
41 288 (Eupercaria), which was consistent with the new fish species taxonomy<sup>44</sup> (Fig. 4). The  
42  
43 289 divergence time between *O. fasciatus* and the common ancestor with *Larimichthys*  
44  
45 290 *crocea* was at approximately 70.5-88.5 Ma.

## 47 291 **Conclusions**

48  
49 292 We successfully assembled the genome of *O. fasciatus* and reported the first  
50  
51 293 chromosome-level genome sequencing, assembly and annotation based on long reads  
52  
53 294 from the third-generation PacBio Sequel sequencing platform. The final draft genome  
54  
55 295 assembly is approximately 778.7 Mb, which was slightly higher than the estimated  
56  
57 296 genome size (777.5 Mb) based on *k*-mer analysis. Those contigs were scaffolded to  
58  
59 297 chromosomes using Hi-C data, resulting in a genome with a high level of continuity.  
60  
61  
62  
63  
64  
65

1 298 With a contig N50 of 2.1 Mb and a scaffold N50 of 33.5 Mb. The chromosome-level  
2 299 genome assembly of *O. fasciatus* also being the first high-quality genome in the  
3  
4 300 Oplegnathidae family. We also predicted 24,003 protein-coding genes from the  
5  
6 301 generated assembly, and 97.3% (23,364 genes) of all protein-coding genes were  
7  
8 302 annotated. We found that the divergence time between *O. fasciatus* and its common  
9  
10 303 ancestor with *Larimichthys crocea* was approximately 70.5-88.5 Ma. As far as we  
11  
12 304 known, the Y chromosomes has always exhibited many specific sequence  
13  
14 305 characteristics compared to X1 and X2, such as repeat content, and those differences  
15  
16 306 might increase the difficulty of the sequence assembly of chromosomes X1 and X2.  
17  
18 307 The chromosome-level genome assembly together with gene annotation data  
19  
20 308 generated for the female fish in this work will provide a valuable resource for further  
21  
22 309 research on sex-determining mechanisms, especially for obtaining an accurate  
23  
24 310 assembly of the Y chromosome in male fish. These results will also accelerate  
25  
26 311 genome-wide association studies in resistant breeding systems.  
27  
28  
29  
30

### 31 **Ethics Statement**

32  
33 314 This research was approved by the Animal Care and Use committee of the Chinese  
34  
35 315 Academy of Science.  
36

### 37 **Availability of supporting data**

38  
39 317 Supporting data and materials are available in the *GigaScience* GigaDB database[45],  
40  
41 318 with the raw sequences deposited in the SRA under the accession number SRP158313  
42  
43 319 and SRP160016<sup>45</sup>.  
44  
45 320  
46  
47 321

### 48 **Abbreviation**

49  
50 322 BUSCO: Benchmarking Universal Single-Copy Orthologs; CDS: Coding sequence;  
51  
52 323 CLR: Continuous Long Reads; GO: Gene ontology; KEGG: Kyoto Encyclopaedia of  
53  
54 324 Genes and Genomes; LINE: Long interspersed nuclear elements; LTR: Long terminal  
55  
56 325 repeats; NGS: Next Generation Sequencing; NR: non-redundant protein; NT:  
57  
58 326 non-redundant nucleotide; TE: Transposable elements.  
59  
60 327  
61  
62  
63  
64  
65

1 328

2 329 **Competing interests**

3 330 The authors declare that they have no competing interests.

4 331

5 332 **Funding**

6 333 This study was supported by a grant from the National Natural Science Foundation of  
7 334 China (No. 41506170, No. 31672672, and No. 31872195), Shandong Province Key  
8 335 Research and Invention Program (2017GHY15102, 2017GHY15106), Qingdao  
9 336 Source Innovation Program (17-1-1-57-jch), Marine Fishery Institute of Zhejiang  
10 337 Province, Key Laboratory of Mariculture and Enhancement of Zhejiang Province  
11 338 (2016KF002), National Key Research and Development Program (2018YFD0901204),  
12 339 STS project (KFZD-SW-106, ZSSD-019), Qingdao National Laboratory for Marine  
13 340 Science and Technology (2015ASKJ02), China Agriculture Research System  
14 341 (CARS-47).

15 342

16 343 **Author Contributions**

17 344 YSX conceived the project. ZZX, DYM collected the samples and extracted the  
18 345 genomic DNA. YSX, JL and JL performed the genome assembly and data analysis.  
19 346 YSX, ZZX, JL, DYM and JL wrote the paper.

20 347

21 348

22 349 **Reference**

- 23 350 1. Schembri PJ, Bodilis P, Francour P, et al. Occurrence of barred kinfefjaw, *Oplegnathuf*  
24 351 *fasciatus* (Actinopterygii: Perciformes: Oplegnathidae), in Malta (Central Mediterranean)  
25 352 with a discussion on possible modes of entry. *Acta Ichthyol Piscat.* 2010; 40:101-104.
- 26 353 2. Mundy BC. Checklist of the fishes of the Hawaiian Archipelago. *Bishop Mus Bull Zool.* 2005;  
27 354 6: 1-704.
- 28 355 3. An HS, Hong SW. Genetic diversity of rock bream *Oplegnathus fasciatus* in Southern  
29 356 Korea. *Genes Genom.* 2008; 30: 451-459.

30  
31  
32  
33  
34  
35  
36  
37  
38  
39  
40  
41  
42  
43  
44  
45  
46  
47  
48  
49  
50  
51  
52  
53  
54  
55  
56  
57  
58  
59  
60  
61  
62  
63  
64  
65



- 1  
2  
3  
4  
5  
6  
7  
8  
9  
10  
11  
12  
13  
14  
15  
16  
17  
18  
19  
20  
21  
22  
23  
24  
25  
26  
27  
28  
29  
30  
31  
32  
33  
34  
35  
36  
37  
38  
39  
40  
41  
42  
43  
44  
45  
46  
47  
48  
49  
50  
51  
52  
53  
54  
55  
56  
57  
58  
59  
60  
61  
62  
63  
64  
65
- 357 4. Xiao YS, Li J, Ren GJ, et al. Pronounced population genetic differentiation in the rock bream  
358 *Oplegnathus fasciatus* inferred from mitochondrial DNA sequences. *Mitochondrial DNA A*.  
359 2016; 27: 2045-2052 ().
  - 360 5. Park HS, Kim CG, Par YJ, et al. Population Genetic Structure of Rock Bream (*Oplegnathus*  
361 *fasciatus* Temminck & Schlegel, 1844) Revealed by mtDNA COI Sequence in Korea and  
362 China. *Ocean Sci J*. 2018; 53: 261-274.
  - 363 6. Xu DD, Lou B, Bertollo LAC, et al. Chromosomal mapping of microsatellite repeats in the  
364 rock bream fish *Oplegnathus fasciatus*, with emphasis of their distribution in the neo-Y  
365 chromosome. *Mol Cytogenet*. 2013; 6: 12.
  - 366 7. Xue R, An H, Liu QH, et al. Karyotype and Ag-Nors In Male And Female Of *Oplegnathus*  
367 *Punctatus*. *Oceanol Limnol Sin*. 2016; 47: 626-632.
  - 368 8. Xiao ZZ. Study on population genetics and culture biology of *Oplegnathus fasciatus*. Doctor  
369 thesis. 2015. P. 162-176.
  - 370 9. Zhang BC, Zhang J, Xiao ZZ, et al. Rock bream (*Oplegnathus fasciatus*) viperin is a  
371 virus-responsive protein that modulates innate immunity and promotes resistance against  
372 megalocytivirus infection. *Dev Comp Immunol*. 2014; 45: 35-42.
  - 373 10. Li H, Sun ZP, Jiang YL, et al. Characterization of an Iridovirus Detected in Rock Bream  
374 (*Oplegnathus fasciatus*; Temminck and Schlegel). *Chin J Virol*. 2011; 27: 158-164.
  - 375 11. Koren S, Walenz BP, Berlin K, et al. Canu: scalable and accurate long-read assembly via  
376 adaptive k-mer weighting and repeat separation. *Genome Res*. 2017; 27: 722.
  - 377 12. Marcais G, Kingsford C. A fast, lock-free approach for efficient parallel counting of  
378 occurrences of k-mers. *Bioinformatics*. 2011; 27: 764-70.
  - 379 13. Kajitani R, Toshimoto K, Noguchi H, et al. Efficient de novo assembly of highly  
380 heterozygous genomes from whole-genome shotgun short reads. *Genome Res*. 2014; 24:  
381 1384-1395.
  - 382 14. Prysycz LP, Gabaldón T. Redundans: an assembly pipeline for highly heterozygous genomes.  
383 *Nucleic Acids Res*. 2016; 44: e113-e113.
  - 384 15. Simão FA, Waterhouse RM, Ioannidis P, et al. BUSCO: assessing genome assembly and  
385 annotation completeness with single-copy orthologs. *Bioinformatics*. 2015; 31: 3210.

- 1  
2  
3  
4  
5  
6  
7  
8  
9  
10  
11  
12  
13  
14  
15  
16  
17  
18  
19  
20  
21  
22  
23  
24  
25  
26  
27  
28  
29  
30  
31  
32  
33  
34  
35  
36  
37  
38  
39  
40  
41  
42  
43  
44  
45  
46  
47  
48  
49  
50  
51  
52  
53  
54  
55  
56  
57  
58  
59  
60  
61  
62  
63  
64  
65
- 386 16. Li H, Durbin R. Fast and accurate short read alignment with Burrows–Wheeler transform.  
387 *Bioinformatics*. 2009; 25: 1754-1760.
  - 388 17. Benson G. Tandem repeats finder: a program to analyze DNA sequences. *Nucleic Acids Res*  
389 1999; 27: 573-580.
  - 390 18. Tarailo-Graovac M, Chen NS. Using RepeatMasker to identify repetitive elements in  
391 genomic sequences. In: Editorial board, Baxevanis Andreas D et al. (eds.), *Current Protocols*  
392 in Bioinformatics, 2009. p. 5: 4.10.1-4.10.14.
  - 393 19. Jurka, J, Kapitonov VV, Pavlicek A, et al. Repbase Update, a database of eukaryotic  
394 repetitive elements. *Cytogenetic Genome Res*. 2005; 110: 462-467.
  - 395 20. Stanke M, Steinkamp R, Waack S, et al. AUGUSTUS: a web server for gene finding in  
396 eukaryotes. *Nucleic Acids Res*. 2004; 32: 309-312.
  - 397 21. Cai Y, González JV, Liu Z, et al. Computational systems biology methods in molecular  
398 biology, chemistry biology, molecular biomedicine, and biopharmacy. *BioMed Res Int*. 2014;  
399 746814.
  - 400 22. Flicek P, Amode MR, Barrell D, et al. Ensembl 2014. *Nucleic Acids Res*. 2014; 42:  
401 D749-D755.
  - 402 23. Gertz EM, Yu YK, Agarwala R, et al. Composition-based statistics and translated nucleotide  
403 searches: Improving the TBLASTN module of BLAST. *MBC Biology*. 2006; 4: 41.
  - 404 24. Birney E, Clamp M, Durbin R, et al. GeneWise and Genomewise. *Genome Res*. 2004; 14:  
405 988-995.
  - 406 25. Trapnell C, Pachter L, Salzberg SL, et al. TopHat: discovering splice junctions with  
407 RNA-Seq. *Bioinformatics*. 2009; 25: 1105-1111.
  - 408 26. Ghosh S, Chan CKK. Analysis of RNA-Seq data using TopHat and Cufflinks. *Methods Mole*  
409 *Biol*. 2016; 1374.
  - 410 27. Campbell MS, Holt C, Moore B, et al. Genome Annotation and Curation Using MAKER and  
411 MAKER-P. *Current Protocols in Bioinformatics*. 2014; 48: 4.11.11.
  - 412 28. Lobo I. Basic Local Alignment Search Tool (BLAST). *J Mol Biol*. 2008; 215: 403-410.
  - 413 29. Harris MA, Clark J, Ireland A, et al. The Gene Ontology (GO) database and informatics  
414 resource. *Nucleic Acids Res*. 2004; 32: D258-D261.
  - 415 30. Ogata H, Goto S, Sato K, et al. KEGG: Kyoto Encyclopedia of Genes and Genomes. *Nucleic*

- 1 416 *Acids Res.* 1999; 27: 29-34.
- 2 417 31. Conesa A, Götz S, García-Gómez JM, et al. Blast2GO: a universal tool for annotation,  
3 418 visualization and analysis in functional genomics research. *Bioinformatics.* 2005; 21: 3674.
- 4 419 32. Lowe TM, Eddy SR. tRNAscan-SE: a program for improved detection of transfer RNA genes  
5 420 in genomic sequence. *Nucleic Acids Res.* 1997; 25: 955-964.
- 6 421 33. Griffiths-jones S, Bateman A, Marshall M, et al. Rfam: an RNA family database. *Nucleic  
7 422 Acids Res.* 2003; 31: 439.
- 8 423 34. Lieberman-Aiden E, Van Berkum NL, Williams L, et al. Comprehensive mapping of  
9 424 long-range interactions reveals folding principles of the human genome. *Science.* 2009; 326:  
10 425 289-293.
- 11 426 35. Rao SSP, Huntley MH, Durand NC, et al. A 3D map of the human genome at kilobase  
12 427 resolution reveals principles of chromatin looping. *Cell.* 2014; 159: 1665-1680.
- 13 428 36. Sandborn AL, Rao SSP, Huang SC, et al. Chromatin extrusion explains key features of loop  
14 429 and domain formation in wild-type and engineered genomes. *Proc Natl Acad Sci USA.* 2015;  
15 430 112: E6456.
- 16 431 37. Flot JF, Marie-Nelly H, Koszul R, et al. Contact genomics: scaffolding and phasing (meta)  
17 432 genomes using chromosome be 3D physical signatures. *FEBS Letters.* 2015; 589: 2966-2974.
- 18 433 38. Burton JN, Adey A, Patwardhan RP, et al. Chromosome-scale scaffolding of de novo genome  
19 434 assemblies based on chromatin interactions. *Nat Biotechnol.* 2013; 31: 1119-1125.
- 20 435 39. Lobo I. Basic Local Alignment Search Tool (BLAST). *J Mol Biol.* 2008; 215: 403-410.
- 21 436 40. Thompson JD, Gibson TJ, Higgins DG, et al. Multiple sequence alignment using ClustalW  
22 437 and ClustalX. *Curr Protoc Bioinformatics.* 2002; 2.3. 1-2.3. 22.
- 23 438 41. Guindon S, Dufayard JF, Hordijk W, et al. PhyML: Fast and Accurate Phylogeny  
24 439 Reconstruction by Maximum Likelihood. *Infect Genet Evol.* 2009; 9: 384-385.
- 25 440 42. Yang Z, Rannala B. Bayesian estimation of species divergence times under a molecular clock  
26 441 using multiple fossil calibrations with soft bounds. *Mol Biol Evol.* 2006; 23: 212-226.
- 27 442 43. Hedges SB, Marin J, Suleski M, et al. Tree of life reveals clock-like speciation and  
28 443 diversification. *Mol Biol Evol.* 2015; 32: 835-845.
- 29 444 44. Betancur-R R, Wiley E, Bailly N, et al. Phylogenetic classification of bony fishes. *BMC Evol  
30 445 Biol.* 2017; 17: 162.

1  
2  
3  
4  
5  
6  
7  
8  
9  
10  
11  
12  
13  
14  
15  
16  
17  
18  
19  
20  
21  
22  
23  
24  
25  
26  
27  
28  
29  
30  
31  
32  
33  
34  
35  
36  
37  
38  
39  
40  
41  
42  
43  
44  
45  
46  
47  
48  
49  
50  
51  
52  
53  
54  
55  
56  
57  
58  
59  
60  
61  
62  
63  
64  
65

446 45. Xiao YS, Xiao ZZ, Ma DY, et al. Supporting data for "Genome sequence of the barred  
447 knifefish *Oplegnathus fasciatus* (Temminck & Schlegel, 1844): the first chromosome-level  
448 draft genome in the family Oplegnathidae". GigaScience Database. 2019.  
449 <http://dx.doi.org/10.5524/100556>.

450

Table 1 Summary of *Oplegnathus fasciatus* genome assembly and annotation

| Genome assembly                              |                 |                                              |
|----------------------------------------------|-----------------|----------------------------------------------|
|                                              | Draft scaffolds | Chromosome-length scaffolds<br>based on Hi-C |
| Length of genome (bp)                        | 778,731,089     | 768,808,243                                  |
| Number of contigs                            | 1,692           | 1,372                                        |
| Contigs N50 (bp)                             | 2,149,025       | 2,130,780                                    |
| Number of scaffold                           | /               | 24                                           |
| Scaffold N50 (bp)                            | /               | 33,548,962                                   |
| Genome coverage (X)                          | 314.6           |                                              |
| Number of contigs ( $\geq 100$ kb)           | 693             | 708                                          |
| Total length of contigs ( $\geq 100$ kb)     | 735,235,962     | 732,827,446                                  |
| Mapping rate of contigs ( $\geq 100$ kb) (%) | /               | 99.67                                        |
| Genome annotation                            |                 |                                              |
| Protein-coding gene number                   | 24,003          |                                              |
| Mean transcript length (kb)                  | 16.1            |                                              |
| Mean exons per gene                          | 10.1            |                                              |
| Mean exon length (bp)                        | 217.7           |                                              |
| Mean intron length (bp)                      | 1527.4          |                                              |

Table 2 The detailed classification of repeat sequences of *Oplegnathus fasciatus*

| Type          | Rebase TEs  |             | TE proteins |             | De novo     |             | Combined TEs |             |
|---------------|-------------|-------------|-------------|-------------|-------------|-------------|--------------|-------------|
|               | Length (bp) | % in genome | Length (bp) | % in genome | Length (bp) | % in genome | Length (bp)  | % in genome |
| DNA           | 39,147,527  | 5.03        | 5,390,266   | 0.69        | 93,089,344  | 11.95       | 124,417,402  | 15.98       |
| LINE          | 23,983,322  | 3.08        | 16,460,762  | 2.11        | 57,167,551  | 7.34        | 85,761,250   | 11.01       |
| SINE          | 875,585     | 0.11        | 0           | 0.00        | 914,559     | 0.12        | 1,747,250    | 0.22        |
| LTR           | 10,163,601  | 1.31        | 5,770,483   | 0.74        | 31,126,639  | 4.00        | 42,465,968   | 5.45        |
| Satellite     | 2,028,992   | 0.26        | 0           | 0.00        | 2,613,480   | 0.34        | 4,361,048    | 0.56        |
| Simple_repeat | 1,556,026   | 0.20        | 0           | 0.00        | 5,179,965   | 0.67        | 6,386,303    | 0.82        |
| Other         | 6,545       | 0.00        | 0           | 0.00        | 0           | 0.00        | 6,545        | 0.00        |
| Unknown       | 331,430     | 0.04        | 0           | 0.00        | 20,636,768  | 2.65        | 20,967,052   | 2.69        |
| Total         | 73,544,786  | 9.44        | 27,613,880  | 3.55        | 183,954,095 | 23.62       | 250,611,845  | 32.18       |

## Figure Legends

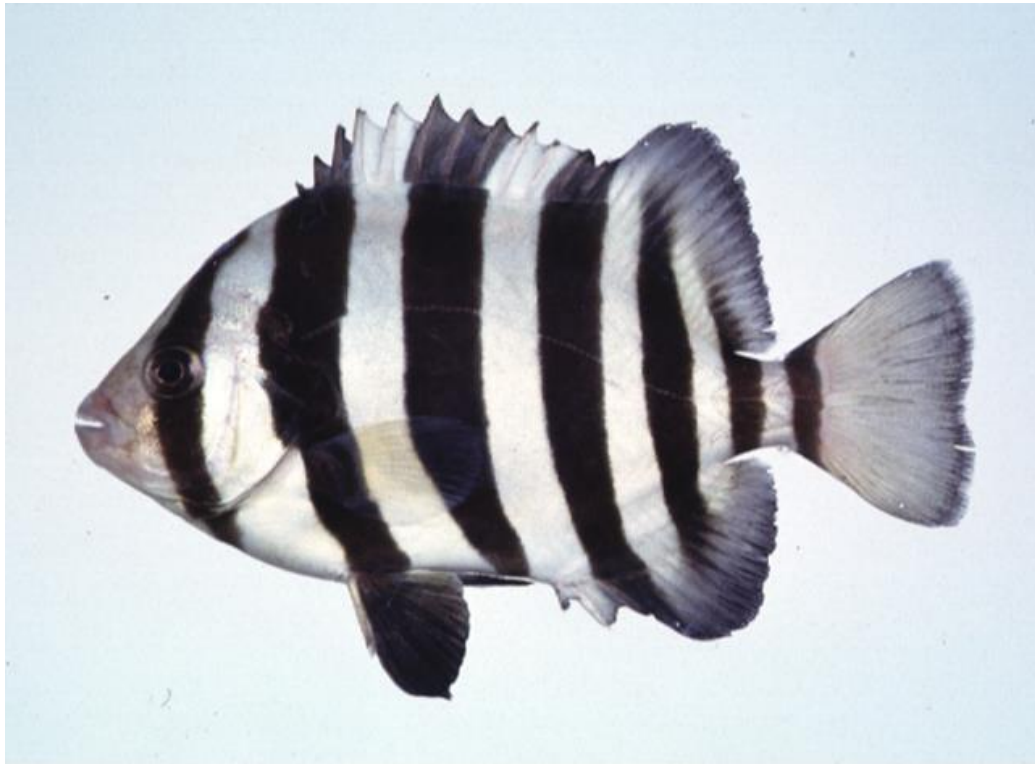

Fig. 1 A representative individual of *O. fasciatus*

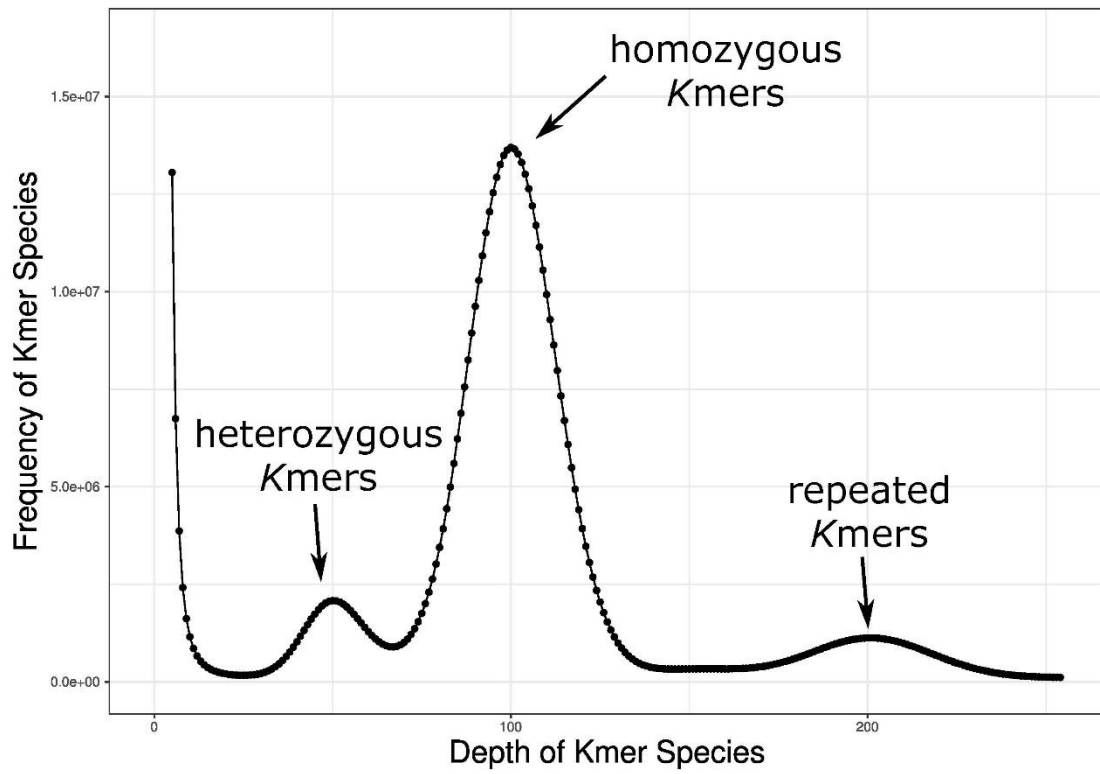

Fig. 2 *k*-mer distribution of the *O. fasciatus* genome



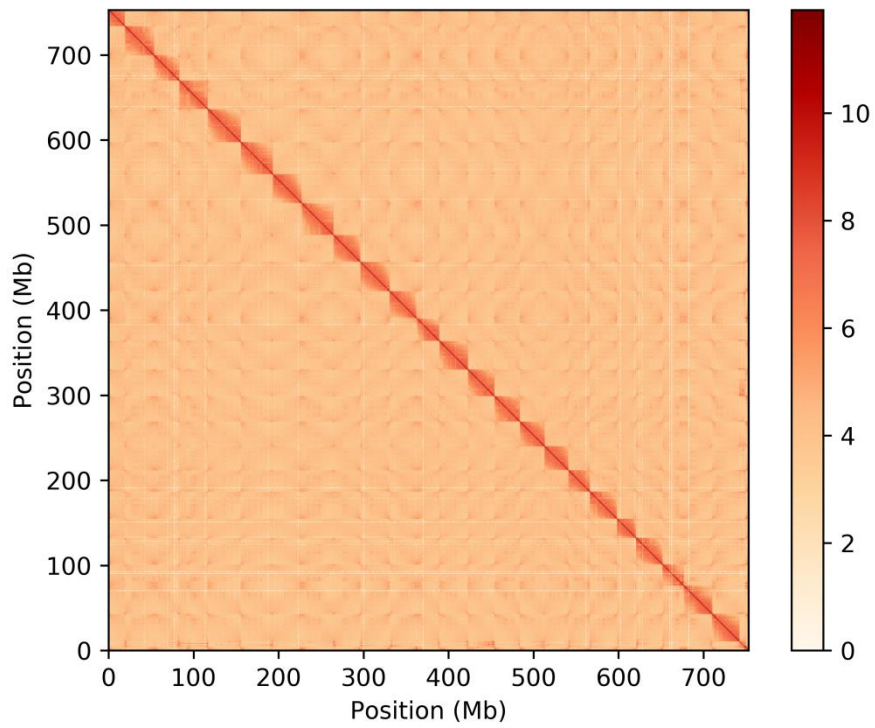

Fig. 3 Hi-C interaction heatmap for *O. fasciatus* reference genome, showing interactions between the 24 chromosomes

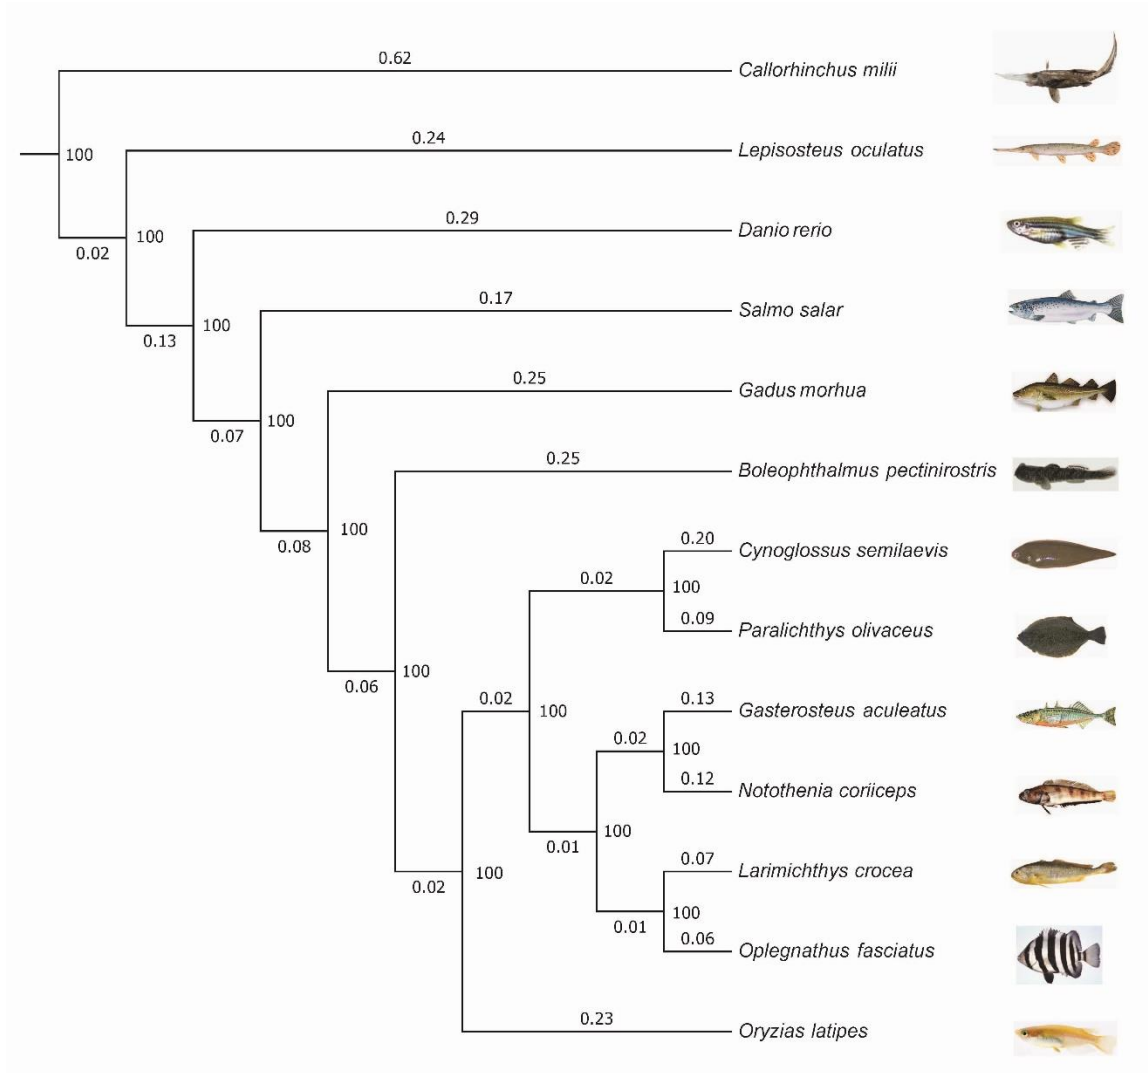

Fig. 4 The phylogenetic relationships of *O. fasciatus* with other fishes. The bootstrap values (larger than 1) calculated from 1000 bootstrap replicates and the branch lengths (smaller than 1) were labelled at and below/above each branch, respectively

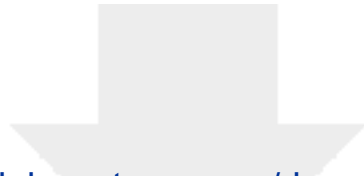

[Click here to access/download](#)

**Supplementary Material**

**New manuscript-tracked changes.docx**

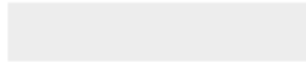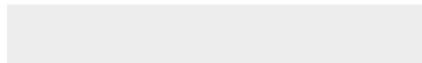

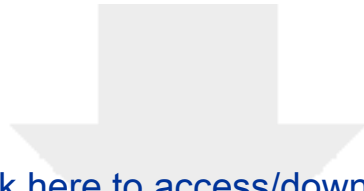

Click here to access/download  
**Supplementary Material**  
4new-new-supplementary materials.docx

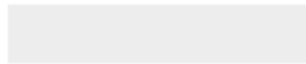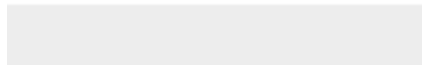

Supplement: giz013_giga-d-18-00300_revision_2.pdf [file giz013_giga-d-18-00300_revision_2.pdf]
